# Supplementary material for: Er-Xian Decoction Stimulates Osteoblastic Differentiation of Bone Mesenchymal Stem Cells in Ovariectomized Mice and Its Gene Profile Analysis
Source: Stem Cells Int. 2016 Mar 15;2016:4079210. doi: 10.1155/2016/4079210 (PMC4811212; doi:10.1155/2016/4079210)
Supplement: Supplementary file 1 — Supplement 1: Information of all genes whose expressions were changed (more than 1.5-fold) among Sham, OVX and EXD groups. [file 4079210.f1.xls]

## Sheet: OVX vs Sham and EXD down >=1.5
SEQ_ID	p-value ( T Test unpaired [Mo] Vs [Zheng] P <= 0.05 FC >=1.5 )	FCAbsolute ( T Test unpaired [Mo] Vs [Zheng] P <= 0.05 FC >=1.5 )	regulation ( T Test unpaired [Mo] Vs [Zheng] P <= 0.05 FC >=1.5 )	p-value ( T Test unpaired [Deng] Vs [Mo] P <= 0.05 FC >=1.5 )	FCAbsolute ( T Test unpaired [Deng] Vs [Mo] P <= 0.05 FC >=1.5 )	regulation ( T Test unpaired [Deng] Vs [Mo] P <= 0.05 FC >=1.5 )	[Deng](raw)	[Mo](raw)	[Zheng](raw)	[Deng_1, Deng](raw)	[Deng_2, Deng](raw)	[Deng_3, Deng](raw)	[Mo_1, Mo](raw)	[Mo_2, Mo](raw)	[Mo_3, Mo](raw)	[Zheng_1, Zheng](raw)	[Zheng_2, Zheng](raw)	[Zheng_3, Zheng](raw)	ACCESSION	GENE_NAME	SYNONYM	DESCRIPTION	GENE_ID	CHROMOSOME	START	STOP	GO biological process	GO cellular component	GO molecular function	UniGene	TIGRID	EnsemblID
AB093278	0.00056864	1.88875	down	0.000155723	2.08231	up	266.698	127.796	242.232	280.425	240.637	279.033	131.313	124.079	127.995	269.589	217.865	239.24	AB093278	Ttll5	1700048H13Rik,2310009M18Rik,4930556H18Rik,AI428864,D630041K24Rik,R75373,STAMP,mKIAA0998	Mus musculus mRNA for mKIAA0998 protein.	320244	chr12	87165659	87394850	GO:0006464(protein modification process)		GO:0004835(tubulin-tyrosine ligase activity);GO:0016874(ligase activity)	Mm.132172	TC1590432///TC1593105///NP736985///TC1606424	ENSMUST00000095536///ENSMUST00000040179///ENSMUST00000040273
AF228705	0.0046787	1.72131	down	0.0127983	1.6839	up	294.286	175.116	299.164	315.822	318.416	248.622	207.541	163.336	154.47	311.134	282.213	304.146	AF228705	Nfat5	AI225870,B130038B15Rik,CAG-8,CAG80,NFATL1,OREBP,TonEBP,mKIAA0827,nfatz	Mus musculus NFATz1 (Nfatz1) mRNA, complete cds.	54446	chr8	109862407	109879634	GO:0001816(cytokine production);GO:0006350(transcription);GO:0006351(transcription, DNA-dependent);GO:0006355(regulation of transcription, DNA-dependent);GO:0045449(regulation of transcription);GO:0045944(positive regulation of transcription from RNA polymerase II promoter)	GO:0005634(nucleus);GO:0005737(cytoplasm)	GO:0003677(DNA binding);GO:0003700(transcription factor activity);GO:0005515(protein binding)	Mm.402984///Mm.390057	TC1594797///TC1610645///TC1618944///TC1575421///TC1605597	ENSMUST00000075922///ENSMUST00000077440
AF352180	7.4055e-05	1.80007	down	1.84358e-05	1.93509	up	473.488	244.673	440.656	454.538	481.402	484.523	238.756	253.856	241.407	421.32	465.687	434.962	AF352180	Pcm1	2600002H09Rik,9430077F19Rik,C030044G17Rik,MGC170660	alt '2600002H09Rik#9430077F19Rik#C030044G17Rik#MGC170660'	18536	chr8	42343144	42416274		GO:0005856(cytoskeleton)		Mm.117896	TC1575336///TC1782024///TC1599157	ENSMUST00000045218
AF374167	0.00409154	2.16569	down	0.0291652	1.60432	up	73.7809	46.4479	99.303	78.7473	63.4513	79.144	37.9171	57.5054	43.9211	91.9202	97.985	108.004	AF374167	Acaca	A530025K05Rik,Acac,Acc1,Gm738	alt 'A530025K05Rik#Acac#Acc1#Gm738'	107476	chr11	83986819	84009189	GO:0006633(fatty acid biosynthetic process);GO:0008152(metabolic process);GO:0008610(lipid biosynthetic process)		GO:0000166(nucleotide binding);GO:0003824(catalytic activity);GO:0003989(acetyl-CoA carboxylase activity);GO:0004075(biotin carboxylase activity);GO:0005524(ATP binding);GO:0009374(biotin binding);GO:0016874(ligase activity);GO:0030145(manganese ion binding);GO:0046872(metal ion binding)	Mm.31374	TC1723643///TC1602014	ENSMUST00000103201
AF461114	0.00514977	1.70327	down	0.0118084	2.05434	up	164.393	78.7618	133.935	163.187	124.026	205.967	81.1016	87.1802	68.0035	119.18	135.493	147.134	AF461114	Fmr1	FMRP,Fmr-1	alt 'FMRP#Fmr-1'	14265	chrX	65931729	65971136	GO:0006810(transport);GO:0007417(central nervous system development);GO:0051028(mRNA transport)	GO:0005634(nucleus)	GO:0003723(RNA binding);GO:0005515(protein binding)	Mm.3451	NP059158///NP361886	ENSMUST00000088546
AF502585	0.0157907	1.57401	down	0.00348306	1.74734	up	218.872	124.714	198.139	224.413	187.116	245.086	124.67	115.481	133.989	181.948	240.694	171.774	AF502585	Hisppd2a	B430315C20Rik,mKIAA0377	Mus musculus KIAA0377-like protein mRNA, complete cds.	327655	chr2	121136296	121176749			GO:0003993(acid phosphatase activity)	Mm.386076	TC1670668///TC1580092	ENSMUST00000052029///ENSMUST00000038906
AJ242720	0.0244938	1.91082	down	0.0233378	2.41982	up	226.28	92.7602	173.925	158.527	216.485	303.827	75.0822	124.433	78.7653	154.163	161.87	205.742	AJ242720	Rb1cc1	2900055E04Rik,5930404L04Rik,Cc1,DRAGOU14,FIP200,LaXp180	Mus musculus mRNA for partial LaXp180 protein.	12421	chr1	6252914	6265656	GO:0001889(liver development);GO:0001934(positive regulation of protein amino acid phosphorylation);GO:0006350(transcription);GO:0006355(regulation of transcription, DNA-dependent);GO:0007049(cell cycle);GO:0007254(JNK cascade);GO:0007507(heart development);GO:0043066(negative regulation of apoptosis);GO:0045786(negative regulation of progression through cell cycle);GO:0045793(positive regulation…	GO:0005634(nucleus);GO:0005737(cytoplasm)	GO:0005515(protein binding)	Mm.293811	TC1667062///TC1627593///TC1615385///TC1574566///TC1653373	ENSMUST00000027040
AJ400622	0.0023073	1.57743	down	0.00688126	1.75076	up	632.965	357.385	565.725	569.144	775.171	554.58	356.495	345.608	370.052	610.554	588.929	497.692	AJ400622	Tmeff1	A830033E11,M7365,Tr1	Mus musculus partial mRNA for tomoregulin-1 (M7365) (TR-1 gene).	230157	chr4	48598064	48676003	GO:0007275(multicellular organismal development)	GO:0016020(membrane);GO:0016021(integral to membrane)	GO:0004867(serine-type endopeptidase inhibitor activity)	Mm.440248	TC1635873///TC1574275	ENSMUST00000030032
AK004560	0.0437545	1.55952	down	0.0279767	1.80659	up	425.748	238.257	364.836	495.186	354.335	427.722	266.909	273.51	174.352	389.91	369.616	334.983	AK004560	Tanc1	1200003E16Rik,Tanc,mKIAA1728	Mus musculus adult male lung cDNA, RIKEN full-length enriched library, clone:1200003E16 product:hypothetical Serine-rich region containing protein, full insert sequence.	66860	chr2	59679796	59684206			GO:0003677(DNA binding);GO:0005488(binding)	Mm.27917	TC1575754///TC1595239	ENSMUST00000037526///ENSMUST00000056900
AK006330	0.000333146	2.00218	down	0.000985626	3.00963	up	115.042	37.868	75.5713	139.217	94.2687	111.639	40.2324	33.5255	39.8461	74.5706	74.574	77.5694	AK006330	Gpr160	1700025D19Rik,GPCR150	Mus musculus adult male testis cDNA, RIKEN full-length enriched library, clone:1700025D19 product:weakly similar to PUTATIVE G PROTEIN-COUPLED RECEPTOR [Homo sapiens], full insert sequence.	71862	chr3	30754871	30796087	GO:0007165(signal transduction);GO:0007186(G-protein coupled receptor protein signaling pathway)	GO:0016020(membrane);GO:0016021(integral to membrane)	GO:0001584(rhodopsin-like receptor activity);GO:0004871(signal transducer activity);GO:0004872(receptor activity);GO:0004930(G-protein coupled receptor activity)	Mm.272019	TC1583275	ENSMUST00000046748
AK008554	0.0379422	1.64487	down	0.0332709	1.85987	up	275.149	147.17	240.463	359.844	232.349	233.254	115.715	144.488	181.305	289.907	218.885	212.596	AK008554	Aasdhppt	2010309J24Rik,2810407B07Rik,AASD-PPT,CGI-80,LYS2,LYS5	Mus musculus adult male small intestine cDNA, RIKEN full-length enriched library, clone:2010309J24 product:similar to PROTEINX0005 [Homo sapiens], full insert sequence.	67618	chr9	4295092	4309454	GO:0008150(biological_process);GO:0009059(macromolecule biosynthetic process)	GO:0005575(cellular_component)	GO:0000287(magnesium ion binding);GO:0003674(molecular_function);GO:0008897(phosphopantetheinyltransferase activity);GO:0016740(transferase activity)	Mm.33970	TC1619823///TC1606673///TC1596359	ENSMUST00000051589
AK008974	0.0419148	1.97259	down	0.00314596	3.44881	up	157.045	45.4184	91.1526	181.272	115.173	174.691	39.8639	38.5771	57.8143	117.897	93.95	61.6103	AK008974	Lipn	2210418G03Rik,Lipl4	Mus musculus adult male stomach cDNA, RIKEN full-length enriched library, clone:2210418G03 product:hypothetical alpha/beta-Hydrolases structure containing protein, full insert sequence.	70166	chr19	34141847	34155648	GO:0006629(lipid metabolic process)		GO:0003824(catalytic activity);GO:0004771(sterol esterase activity);GO:0016787(hydrolase activity);GO:0016789(carboxylic ester hydrolase activity)	Mm.75602	TC1697044	ENSMUST00000025682
AK012269	0.00102305	1.71301	down	0.011088	2.09615	up	70.0079	32.6787	55.9624	82.957	49.8588	77.2079	35.736	31.4164	30.8837	60.7522	54.3449	52.7901	AK012269	Trim59	2310035M22Rik,2700022F13Rik,Mrf1,TSBF1	Mus musculus 11 days embryo whole body cDNA, RIKEN full-length enriched library, clone:2700022F13 product:hypothetical B-box zinc finger domain/RING finger containing protein, full insert sequence.	66949	chr3	68839893	68848664		GO:0005622(intracellular);GO:0016020(membrane);GO:0016021(integral to membrane)	GO:0005515(protein binding);GO:0008270(zinc ion binding);GO:0046872(metal ion binding)	Mm.176695	TC1575209	ENSMUST00000042499
AK014419	0.000740844	1.58845	down	0.00543543	2.02161	up	233.332	113.737	180.816	234.98	282.057	182.96	108.112	113.701	119.397	194.308	168.899	179.241	AK014419	Nup205	3830404O05Rik,AV248391,mKIAA0225	Mus musculus 18 days pregnant adult female placenta and extra embryonic tissue cDNA, RIKEN full-length enriched library, clone:3830404O05 product:hypothetical protein, full insert sequence.	70699	chr6	35127617	35155651		GO:0016021(integral to membrane);GO:0019867(outer membrane)	GO:0015288(porin activity)	Mm.261208	TC1580583///TC1606913	ENSMUST00000043815
AK014446	0.00717178	1.52953	down	0.0355319	1.85963	up	1267.54	656.551	1007.62	935.467	1779.95	1087.19	610.847	707.119	651.686	1118.43	874.033	1030.38	AK014446	Pvr	3830421F03Rik,CD155,D7Ertd458e,HVED,PVS,Taa1,Tage4,mE4,necl-5	Mus musculus 18 days pregnant adult female placenta and extra embryonic tissue cDNA, RIKEN full-length enriched library, clone:3830421F03 product:hypothetical protein, full insert sequence.	52118	chr7	20501112	20506441	GO:0016337(cell-cell adhesion);GO:0016477(cell migration)	GO:0005575(cellular_component)	GO:0004872(receptor activity);GO:0005515(protein binding)	Mm.227506	TC1576466///TC1602216///TC1756958	ENSMUST00000043517
AK014525	0.00743378	2.55502	down	6.72914e-06	2.44584	up	302.563	123.723	326.394	300.871	293.656	313.163	124.957	118.479	127.734	402.867	357.01	219.307	AK014525	Vcan	5430420N07Rik,9430051N09,Cspg2,DPEAAE,NG2,PG-M,PG-M(V0),PG-M(V1),hdf	Mus musculus 0 day neonate skin cDNA, RIKEN full-length enriched library, clone:4631420C02 product:chondroitin sulfate proteoglycan 2, full insert sequence.	13003	chr13	89827889	89882117	GO:0007155(cell adhesion);GO:0007507(heart development)	GO:0005578(proteinaceous extracellular matrix)	GO:0005509(calcium ion binding);GO:0005529(sugar binding);GO:0005540(hyaluronic acid binding)	Mm.158700	TC1613353///TC1670653///TC1623993///TC1588416///TC1591070	ENSMUST00000022114///ENSMUST00000099342
AK014886	0.0297915	1.52144	down	0.00400791	1.89663	up	298.438	157.231	240.44	253.216	319.93	322.17	138.192	155.627	177.875	193.44	268.155	259.724	AK014886	Lrrk2	4921513O20Rik,9330188B09Rik,AW561911,D630001M17Rik,Gm927,cI-46	Mus musculus adult male testis cDNA, RIKEN full-length enriched library, clone:4921513O20 product:hypothetical Serine/Threonine protein kinase containing protein, full insert sequence.	66725	chr15	91610808	91646555	GO:0006468(protein amino acid phosphorylation);GO:0007264(small GTPase mediated signal transduction)	GO:0005575(cellular_component);GO:0005622(intracellular)	GO:0000166(nucleotide binding);GO:0004672(protein kinase activity);GO:0004674(protein serine/threonine kinase activity);GO:0005096(GTPase activator activity);GO:0005488(binding);GO:0005515(protein binding);GO:0005524(ATP binding);GO:0005525(GTP binding);GO:0016301(kinase activity);GO:0016740(transferase activity)	Mm.37558	TC1584532	ENSMUST00000060642
AK014960	0.00524722	2.01937	down	0.00817662	1.88012	up	330.407	177.972	354.671	329.661	304.267	357.293	219.388	144.924	169.604	368.606	368.389	327.017	AK014960	Setd2	4921524K10Rik,BC031601,KMT3A	Mus musculus adult male testis cDNA, RIKEN full-length enriched library, clone:4921524K10 product:hypothetical protein, full insert sequence.	235626	chr9	110463619	110473239		GO:0005634(nucleus)	GO:0016491(oxidoreductase activity);GO:0046914(transition metal ion binding)	Mm.288949	TC1698441	ENSMUST00000035068
AK016269	0.0209482	1.91083	down	0.00467857	1.51236	up	71.388	47.0492	92.3675	72.2832	62.994	78.8867	45.0699	46.1123	49.9653	111.444	63.8634	101.795	AK016269	Dnajc10	1200006L06Rik,D2Ertd706e,ERdj5,JPDI	Mus musculus adult male testis cDNA, RIKEN full-length enriched library, clone:4930571C17 product:DKFZp434J1813 protein, full insert sequence.	66861	chr2	80155622	80164945	GO:0006457(protein folding);GO:0045454(cell redox homeostasis)	GO:0005783(endoplasmic reticulum)	GO:0031072(heat shock protein binding);GO:0051082(unfolded protein binding)	Mm.21762	TC1572355///TC1608544///TC1664345	ENSMUST00000099971///ENSMUST00000028392
AK028505	0.0279749	1.50751	down	0.0181497	1.82693	up	84.9663	46.6789	69.434	72.0489	81.3179	101.532	48.4096	36.6656	54.9615	72.6435	67.9647	67.6937	AK028505	Rad18	2810024C04Rik,Rad18sc	Mus musculus 0 day neonate skin cDNA, RIKEN full-length enriched library, clone:4632409J05 product:RAD18 homolog (S.cerevisiae), full insert sequence.	58186	chr6	112576409	112646642	GO:0006281(DNA repair);GO:0006512(ubiquitin cycle);GO:0006974(response to DNA damage stimulus)	GO:0000785(chromatin);GO:0005634(nucleus)	GO:0003676(nucleic acid binding);GO:0003677(DNA binding);GO:0005515(protein binding);GO:0008270(zinc ion binding);GO:0016874(ligase activity);GO:0046872(metal ion binding)	Mm.103812	NP374983///TC1603079	ENSMUST00000068487
AK029261	0.040126	1.72863	down	0.042797	1.8987	up	101.755	51.4548	91.2811	101.648	66.1699	137.449	56.0487	46.5572	51.7585	111.203	99.7394	62.901	AK029261	Cpeb3	4831444O18Rik,KIAA0940,mKIAA0940	Mus musculus 0 day neonate head cDNA, RIKEN full-length enriched library, clone:4831444O18 product:KIAA0940 PROTEIN homolog [Homo sapiens], full insert sequence.	208922	chr19	37095780	37272598	GO:0008150(biological_process)	GO:0005575(cellular_component)	GO:0000166(nucleotide binding);GO:0003674(molecular_function);GO:0003676(nucleic acid binding);GO:0003723(RNA binding)	Mm.391176	NP738074	ENSMUST00000044716
AK030323	0.0256218	2.00854	down	0.0095683	2.9315	up	291.831	97.4417	198.174	190.128	342.114	343.251	116.089	99.5415	76.6944	264.848	157.293	172.382	AK030323	Bnc2	5031434M05Rik,8430420F16Rik,MGC124423,MGC124424	Mus musculus 11 days pregnant adult female ovary and uterus cDNA, RIKEN full-length enriched library, clone:5031434M05 product:CDNA FLJ20043 FIS, CLONE COL00430 homolog [Homo sapiens], full insert sequence.	242509	chr4	83920998	84320990	GO:0006350(transcription);GO:0006355(regulation of transcription, DNA-dependent);GO:0008150(biological_process)	GO:0005622(intracellular);GO:0005634(nucleus)	GO:0003676(nucleic acid binding);GO:0003677(DNA binding);GO:0008270(zinc ion binding);GO:0046872(metal ion binding)	Mm.190774	TC1585674	ENSMUST00000102820
AK031097	0.0175785	2.05922	down	0.0254466	2.13619	up	106.115	49.1935	101.049	105.758	75.8905	136.696	38.4011	47.5761	61.6034	89.7271	127.55	85.87	AK031097	Ppm1l	3222401G13,5930404J21Rik,AI481720,AW045850,KIAA4175,PP2C,PP2Cepsilon,Pp2ce,Ppp2ce,mKIAA4175	Mus musculus 13 days embryo forelimb cDNA, RIKEN full-length enriched library, clone:5930404J21 product:unclassifiable, full insert sequence.	242083	chr3	69358392	69364724	GO:0000165(MAPKKK cascade);GO:0006470(protein amino acid dephosphorylation);GO:0007178(transmembrane receptor protein serine/threonine kinase signaling pathway)	GO:0008287(protein serine/threonine phosphatase complex);GO:0016020(membrane);GO:0016021(integral to membrane)	GO:0000287(magnesium ion binding);GO:0003824(catalytic activity);GO:0004721(phosphoprotein phosphatase activity);GO:0004722(protein serine/threonine phosphatase activity);GO:0005515(protein binding);GO:0015071(protein phosphatase type 2C activity);GO:0016787(hydrolase activity);GO:0030145(manganese ion binding);GO:0046872(metal ion binding)	Mm.40577	TC1575595///TC1627305///TC1597780	ENSMUST00000029355
AK031315	0.00102804	1.87157	down	0.00914727	1.83828	up	325.787	175.632	327.955	316.838	266.437	394.085	197.612	167.221	162.063	343.728	337.566	302.572	AK031315	Rabgap1	Gapcena,KIAA4104,MGC30493,mKIAA4104	Mus musculus 13 days embryo male testis cDNA, RIKEN full-length enriched library, clone:6030405K23 product:spermatid perinuclear RNA binding protein, full insert sequence.	227800	chr2	37298804	37343686		GO:0005622(intracellular)	GO:0005097(Rab GTPase activator activity)	Mm.383192	TC1592577///TC1584107///TC1578140	ENSMUST00000061179///ENSMUST00000066055
AK032099	0.00413274	1.5369	down	0.0390825	1.86311	up	491.291	253.809	389.869	695.275	361.189	417.41	227.9	260.297	273.228	422.342	390.401	356.863	AK032099	Dmxl2	6330586A12,6430411K14Rik,E130119P06Rik,mKIAA0856	Mus musculus adult male medulla oblongata cDNA, RIKEN full-length enriched library, clone:6330586A12 product:hypothetical Trp-Asp repeat (WD-repeat) structure containing protein, full insert sequence.	235380	chr9	54270979	54349433	GO:0008150(biological_process)	GO:0008021(synaptic vesicle)	GO:0017137(Rab GTPase binding)	Mm.93636	TC1587772///TC1598580///TC1653829	ENSMUST00000047765
AK032181	0.021776	1.56039	down	0.0238003	1.77301	up	65.8892	37.0938	57.3782	71.9278	74.4088	51.331	38.9685	29.6448	42.6682	63.1457	56.4911	52.4979	AK032181	BC059842	6430407N22,ENSMUSG00000058432,MGC69654,Szt2	Mus musculus adult male olfactory brain cDNA, RIKEN full-length enriched library, clone:6430407N22 product:inferred: KIAA0467 protein {Homo sapiens}, full insert sequence.	230676	chr4	118035347	118047729				Mm.358875	TC1713342	ENSMUST00000048601
AK032388	0.00120488	1.54383	down	0.0151815	1.95394	up	172.606	86.1302	133.053	130.931	159.74	227.146	84.6639	91.6966	82.0302	129.058	144.093	126.007	AK032388	Sdccag1	1500011I12Rik,4933405E14Rik	Mus musculus adult male olfactory brain cDNA, RIKEN full-length enriched library, clone:6430532E20 product:similar to SEROLOGICALLY DEFINED COLON CANCER ANTIGEN 1 [Homo sapiens], full insert sequence.	66244	chr12	70412529	70424639		GO:0005634(nucleus)		Mm.243943///Mm.46705	TC1606156///TC1630839	ENSMUST00000021368
AK032552	0.0304409	1.73268	down	0.0354694	2.367	up	89.7368	37.0243	62.4245	132.558	66.4609	70.1919	49.8808	29.4582	31.734	64.2115	58.6049	64.457	AK032552	Cacna1d	8430418G19Rik,C79217,Cacnl1a2,Cchl1a,Cchl1a2,D-LTCC	Mus musculus adult male olfactory brain cDNA, RIKEN full-length enriched library, clone:6430592L07 product:VOLTAGE-GATED CALCIUM CHANNEL PORE FORMING SUBUNIT CAV1.3 ALPHA1D (FRAGMENT) homolog [Rattus norvegicus], full insert sequence.	12289	chr14	30853124	30859164	GO:0006810(transport);GO:0006811(ion transport);GO:0006813(potassium ion transport);GO:0006816(calcium ion transport);GO:0007188(G-protein signaling, coupled to cAMP nucleotide second messenger);GO:0007605(sensory perception of sound)	GO:0005887(integral to plasma membrane);GO:0005891(voltage-gated calcium channel complex);GO:0008076(voltage-gated potassium channel complex);GO:0016020(membrane);GO:0016021(integral to membrane)	GO:0005216(ion channel activity);GO:0005244(voltage-gated ion channel activity);GO:0005245(voltage-gated calcium channel activity);GO:0005249(voltage-gated potassium channel activity);GO:0005262(calcium channel activity);GO:0005509(calcium ion binding);GO:0008331(high voltage-gated calcium channel activity)	Mm.9772	TC1600954///TC1690167///TC1580567	ENSMUST00000057695
AK033352	0.0385593	1.75418	down	0.00464708	2.46638	up	426.174	176.44	305.827	446.22	441.284	391.019	130.321	220.003	178.996	329.211	245.461	342.809	AK033352	Alkbh8	4930562C03Rik,8030431D03Rik,9430088N01Rik,Abh8,MGC10235	Mus musculus 15 days embryo embryonic body below diaphragm cDNA, RIKEN full-length enriched library, clone:8230401I12 product:similar to HYPOTHETICAL 75.2 KDA PROTEIN [Macaca fascicularis], full insert sequence.	67667	chr9	3335477	3385846	GO:0008152(metabolic process)		GO:0000166(nucleotide binding);GO:0003676(nucleic acid binding);GO:0008168(methyltransferase activity);GO:0016740(transferase activity)	Mm.116968	TC1609496///TC1578514///TC1777783	ENSMUST00000053407
AK034871	0.0250201	1.62421	down	0.0018369	2.05296	up	343.503	168.226	274.278	319.101	337.114	374.295	156.87	149.866	197.941	309.073	295.285	218.477	AK034871	Vcan	5430420N07Rik,9430051N09,Cspg2,DPEAAE,NG2,PG-M,PG-M(V0),PG-M(V1),hdf	Mus musculus 12 days embryo embryonic body between diaphragm region and neck cDNA, RIKEN full-length enriched library, clone:9430051N09 product:chondroitin sulfate proteoglycan 2, full insert sequence.	13003	chr13	89850287	89882117	GO:0007155(cell adhesion);GO:0007507(heart development)	GO:0005578(proteinaceous extracellular matrix)	GO:0005509(calcium ion binding);GO:0005529(sugar binding);GO:0005540(hyaluronic acid binding)	Mm.158700	TC1613353///TC1670653///TC1623993///TC1588416///TC1591070	ENSMUST00000022114///ENSMUST00000099342
AK035724	0.0139834	1.64787	down	0.0240046	1.69978	up	208.38	122.936	200.335	193.013	182.156	249.972	131.863	140.024	96.9203	215.158	193.938	191.907	AK035724	2310035C23Rik	6430401N10,mKIAA1468	Mus musculus adult male urinary bladder cDNA, RIKEN full-length enriched library, clone:9530096F24 product:hypothetical ARM repeat structure containing protein, full insert sequence.	227446	chr1	107560489	107650652			GO:0005488(binding)	Mm.337339	TC1621955	ENSMUST00000086721
AK035728	0.00714526	1.50379	down	0.0368692	1.68441	up	357.277	207.261	311.67	476.328	283.534	311.969	194.193	231.365	196.224	280.556	312.583	341.871	AK035728	Ccnc	AI451004,AU020987,CG1C	Mus musculus adult male urinary bladder cDNA, RIKEN full-length enriched library, clone:9530096J03 product:cyclin C, full insert sequence.	51813	chr4	21654876	21659727	GO:0000074(regulation of progression through cell cycle);GO:0000910(cytokinesis);GO:0006350(transcription);GO:0006355(regulation of transcription, DNA-dependent);GO:0007049(cell cycle);GO:0051301(cell division)	GO:0005634(nucleus)		Mm.278584	TC1593551///TC1577607	ENSMUST00000102997
AK038365	0.015946	1.50867	down	0.00117915	2.07419	up	152.307	73.234	111.07	174.863	143.039	139.018	68.5456	70.3388	80.8176	95.3202	108.416	129.474	AK038365	N/A	N/A	Mus musculus 16 days neonate thymus cDNA, RIKEN full-length enriched library, clone:A130099A10 product:peptide N-glycanase homolog (S.cerevisiae), full insert sequence.	N/A	chr14	17081827	17115813
AK039170	0.033152	1.76653	down	0.00534817	2.39201	up	220.017	93.3327	163.497	246.75	192.662	220.638	70.6411	115.1	94.2572	185.345	174.568	130.576	AK039170	Gorab	AI467484,NTKL-BP1,Scyl1bp1	Mus musculus adult male hypothalamus cDNA, RIKEN full-length enriched library, clone:A230104G01 product:hypothetical protein, full insert sequence.	98376	chr1	165315039	165333772		GO:0005737(cytoplasm)	GO:0005515(protein binding)	Mm.32901	TC1578067	ENSMUST00000045138
AK039264	0.000608522	1.6977	down	0.00208268	1.78317	up	299.692	166.929	284.209	272.187	350.232	276.657	166.099	166.918	167.769	289.322	307.41	255.896	AK039264	Krit1	2010007K12Rik,A630036P20Rik,AA432855,AI450393,AI643869,BB155247,BB235701,Ccm1,Krit1A,Krit1B	Mus musculus adult male spinal cord cDNA, RIKEN full-length enriched library, clone:A330009E21 product:KRIT1 homolog [Mus musculus], full insert sequence.	79264	chr5	3803188	3836894		GO:0005856(cytoskeleton)	GO:0005083(small GTPase regulator activity);GO:0005488(binding);GO:0005515(protein binding)	Mm.32368	TC1638455///TC1585377///TC1612689	ENSMUST00000080085
AK039440	0.00330752	1.71849	down	0.0112956	1.56433	up	490.264	314.322	537.13	484.487	442.772	543.533	328.055	348.493	266.419	555.264	506.464	549.663	AK039440	Polr3a	9330175N20Rik,BC053071,MGC62420,RPC1,RPC155	Mus musculus adult male spinal cord cDNA, RIKEN full-length enriched library, clone:A330043C08 product:hypothetical protein, full insert sequence.	218832	chr14	25303024	25306268	GO:0006350(transcription)	GO:0005634(nucleus)	GO:0003677(DNA binding);GO:0003899(DNA-directed RNA polymerase activity)	Mm.343610///Mm.395588///Mm.399136	TC1770398///TC1610622///TC1586120	ENSMUST00000100828
AK039576	0.00812563	2.05982	down	0.00090155	2.36443	up	136.466	57.6278	120.394	154.071	119.264	136.063	50.6822	59.9357	62.2656	151.154	95.4211	114.608	AK039576	Kif13a	4930505I07Rik,KIAA4109,mKIAA4109	Mus musculus adult male spinal cord cDNA, RIKEN full-length enriched library, clone:A330065I17 product:kinesin 13A, full insert sequence.	16553	chr13	46844456	46848347	GO:0006810(transport);GO:0007017(microtubule-based process);GO:0007018(microtubule-based movement);GO:0015031(protein transport)	GO:0005871(kinesin complex);GO:0005874(microtubule);GO:0005875(microtubule associated complex)	GO:0000166(nucleotide binding);GO:0003774(motor activity);GO:0003777(microtubule motor activity);GO:0005524(ATP binding)	Mm.342703	TC1712239///TC1604166///TC1638207	ENSMUST00000056978
AK044769	0.0438831	1.85527	down	0.0411047	1.9964	up	172.651	89.0186	158.984	145.759	212.734	159.458	78.6647	125.394	62.9973	179.88	150.004	147.067	AK044769	Macf1	ABP620,Acf7,Aclp7,MACF,R74989,mACF7,mKIAA0465	Mus musculus adult retina cDNA, RIKEN full-length enriched library, clone:A930041F10 product:actin-crosslinking protein 7, full insert sequence.	11426	chr4	123109240	123130272	GO:0001707(mesoderm formation);GO:0005975(carbohydrate metabolic process);GO:0006620(posttranslational protein targeting to membrane);GO:0006928(cell motility);GO:0007050(cell cycle arrest);GO:0007163(establishment and/or maintenance of cell polarity);GO:0016055(Wnt receptor signaling pathway)	GO:0005856(cytoskeleton);GO:0015629(actin cytoskeleton);GO:0015630(microtubule cytoskeleton)	GO:0003779(actin binding);GO:0004553(hydrolase activity, hydrolyzing O-glycosyl compounds);GO:0005509(calcium ion binding);GO:0005515(protein binding);GO:0008017(microtubule binding)	Mm.402299	TC1595900///TC1592346	ENSMUST00000068523///ENSMUST00000084301
AK044921	0.0291139	2.12538	down	0.0200821	1.59551	up	155.011	98.2303	213.451	147.985	169.273	147.777	77.1089	104.822	112.76	237.895	140.311	262.146	AK044921	Vwf	6820430P06Rik,AI551257,B130011O06Rik,C630030D09,F8VWF,VWD	Mus musculus 9.5 days embryo parthenogenote cDNA, RIKEN full-length enriched library, clone:B130011O06 product:VON WILLEBRAND FACTOR (FRAGMENT) homolog [Saguinus bicolor], full insert sequence.	22371	chr6	125502980	125554794	GO:0001889(liver development);GO:0001890(placenta development);GO:0007155(cell adhesion);GO:0007596(blood coagulation);GO:0007599(hemostasis);GO:0030168(platelet activation);GO:0051260(protein homooligomerization)	GO:0005576(extracellular region);GO:0005578(proteinaceous extracellular matrix);GO:0005615(extracellular space);GO:0005783(endoplasmic reticulum)	GO:0001948(glycoprotein binding);GO:0005178(integrin binding);GO:0005515(protein binding);GO:0005518(collagen binding);GO:0019865(immunoglobulin binding);GO:0042803(protein homodimerization activity);GO:0047485(protein N-terminus binding);GO:0051087(chaperone binding)	Mm.22339	TC1595884///TC1597015///TC1596730	ENSMUST00000001995
AK045203	0.0268415	1.94043	down	0.0290126	2.18832	up	150.717	69.8349	131.317	188.855	116.509	146.786	79.4444	46.3379	83.7225	135.895	120.213	137.842	AK045203	Mtpap	0610027A18Rik,AW551379,Papd1	Mus musculus 9.5 days embryo parthenogenote cDNA, RIKEN full-length enriched library, clone:B130046L03 product:hypothetical protein, full insert sequence.	67440	chr18	4375589	4383521	GO:0006350(transcription);GO:0006397(mRNA processing)	GO:0005739(mitochondrion)	GO:0003676(nucleic acid binding);GO:0003723(RNA binding);GO:0004652(polynucleotide adenylyltransferase activity);GO:0016740(transferase activity)	Mm.49826	TC1576340///TC1601615	ENSMUST00000025077
AK045851	0.000975039	1.73848	down	0.00254343	1.82274	up	387.697	211.234	368.248	456.344	348.1	358.646	212.19	201.739	219.774	397.236	380.318	327.192	AK045851	Trp53bp1	53BP1,MGC100303,m53BP1	Mus musculus adult male corpora quadrigemina cDNA, RIKEN full-length enriched library, clone:B230314P12 product:similar to TUMOR SUPPRESSOR P53-BINDING PROTEIN 1 (P53-BINDING PROTEIN 1) (53BP1) [Homo sapiens], full insert sequence.	27223	chr2	121041402	121097105	GO:0006281(DNA repair);GO:0006350(transcription);GO:0006355(regulation of transcription, DNA-dependent);GO:0006974(response to DNA damage stimulus)	GO:0000776(kinetochore);GO:0005622(intracellular);GO:0005634(nucleus);GO:0005657(replication fork)	GO:0003677(DNA binding);GO:0003684(damaged DNA binding);GO:0005515(protein binding);GO:0008134(transcription factor binding)	Mm.215389	TC1586204///TC1705812	ENSMUST00000065020///ENSMUST00000037243
AK045873	0.00965157	1.65063	down	0.0316045	1.61888	up	78.9803	48.2043	79.6736	64.1119	73.3519	99.477	54.8696	46.8532	42.8902	72.2051	92.8506	73.9653	AK045873	Dopey1	B130005I07Rik,BC035275,C130028L17,D9Ertd809e,KIAA1117,MGC49390	Mus musculus adult male corpora quadrigemina cDNA, RIKEN full-length enriched library, clone:B230316B03 product:hypothetical P-loop containing nucleotide triphosphate hydrolases structure containing protein, full insert sequence.	320615	chr9	86360785	86414162	GO:0006118(electron transport)		GO:0004497(monooxygenase activity);GO:0005506(iron ion binding);GO:0016787(hydrolase activity);GO:0020037(heme binding)	Mm.432607	TC1643846///TC1612479///TC1596817	ENSMUST00000034987
AK049283	0.0202982	2.22498	down	0.00174274	2.22594	up	329.892	148.014	340.25	287.561	378.66	323.455	153.388	127.98	162.675	409.472	218.964	392.313	AK049283	Usp9x	5730589N07Rik,AA407302,AA407699,AL022658,AL022749,Dffrx,FAF-X,Fafl	Mus musculus ES cells cDNA, RIKEN full-length enriched library, clone:C330019F14 product:ubiquitin specific protease 9, X chromosome, full insert sequence.	22284	chrX	12648623	12700636	GO:0006511(ubiquitin-dependent protein catabolic process);GO:0006512(ubiquitin cycle)	GO:0005737(cytoplasm)	GO:0004221(ubiquitin thiolesterase activity);GO:0008233(peptidase activity);GO:0008234(cysteine-type peptidase activity);GO:0016787(hydrolase activity)	Mm.242646	TC1604048///TC1572338	ENSMUST00000078385///ENSMUST00000089302
AK049633	0.00496132	1.70345	down	0.0277879	1.5532	up	332.039	212.794	361.159	303.861	403.12	289.135	193.231	197.599	247.552	393.202	362.363	327.911	AK049633	Hinfp	AA589481,DKFZp434F162,HiNF-P,Mizf	Mus musculus 12 days embryo spinal cord cDNA, RIKEN full-length enriched library, clone:C530010C09 product:hypothetical Zinc finger, C2H2 type containing protein, full insert sequence.	102423	chr9	44103755	44113712	GO:0006350(transcription);GO:0006355(regulation of transcription, DNA-dependent)	GO:0005622(intracellular);GO:0005634(nucleus)	GO:0003676(nucleic acid binding);GO:0003677(DNA binding);GO:0008270(zinc ion binding);GO:0046872(metal ion binding)	Mm.24570	TC1583027	ENSMUST00000034629
AK052301	0.00562404	1.72515	down	0.022864	1.51645	up	81.6003	53.8027	92.5389	89.1429	87.0215	68.6366	62.7618	49.5364	49.1099	81.8806	95.8188	99.9173	AK052301	Tln2	5730421P04Rik,AI507121,AI787438,AL118320,MGC100340,mKIAA0320	Mus musculus 13 days embryo heart cDNA, RIKEN full-length enriched library, clone:D330023F04 product:hypothetical Band 4.1 family containing protein, full insert sequence.	70549	chr9	67240258	67276610	GO:0007016(cytoskeletal anchoring);GO:0007155(cell adhesion)	GO:0001726(ruffle);GO:0005856(cytoskeleton);GO:0005925(focal adhesion);GO:0015629(actin cytoskeleton);GO:0045202(synapse)	GO:0003779(actin binding);GO:0005198(structural molecule activity);GO:0005200(structural constituent of cytoskeleton);GO:0005488(binding);GO:0005515(protein binding)	Mm.33645	TC1582188///TC1632792	ENSMUST00000085405///ENSMUST00000039662
AK053076	0.00416926	1.95841	down	0.0428129	1.93456	up	243.423	122.696	237.448	166.08	236.977	327.212	102.345	116.289	149.453	229.335	249.743	233.267	AK053076	Als2cl	79H19D,79H19E,BC022645,D930044G19Rik,mRn.49018	Mus musculus 15 days embryo head cDNA, RIKEN full-length enriched library, clone:D930044G19 product:hypothetical MORN motif/Vacuolar sorting protein 9 (VPS9) domain containing protein, full insert sequence.	235633	chr9	110782677	110803028	GO:0007032(endosome organization and biogenesis);GO:0008104(protein localization)	GO:0016023(cytoplasmic membrane-bound vesicle)	GO:0005515(protein binding);GO:0017112(Rab guanyl-nucleotide exchange factor activity);GO:0017137(Rab GTPase binding);GO:0042802(identical protein binding)	Mm.86338	TC1578936///TC1710340	ENSMUST00000084926
AK053279	0.00586847	1.75026	down	0.0314306	1.61455	up	876.629	536.226	940.371	673.544	1055.26	901.081	554.212	585.548	468.92	975.563	799.657	1045.89	AK053279	Usp9x	5730589N07Rik,AA407302,AA407699,AL022658,AL022749,Dffrx,FAF-X,Fafl	Mus musculus 0 day neonate eyeball cDNA, RIKEN full-length enriched library, clone:E130006I06 product:ubiquitin specific protease 9, X chromosome, full insert sequence.	22284	chrX	12706606	12709666	GO:0006511(ubiquitin-dependent protein catabolic process);GO:0006512(ubiquitin cycle)	GO:0005737(cytoplasm)	GO:0004221(ubiquitin thiolesterase activity);GO:0008233(peptidase activity);GO:0008234(cysteine-type peptidase activity);GO:0016787(hydrolase activity)	Mm.242646	TC1604048///TC1572338	ENSMUST00000078385///ENSMUST00000089302
AK053672	0.0302479	1.67535	down	0.00868149	2.2173	up	95.2735	43.4917	71.7814	105.618	100.302	79.9013	32.1769	47.5681	50.7302	74.8698	62.7235	77.7508	AK053672	Dmxl2	6330586A12,6430411K14Rik,E130119P06Rik,mKIAA0856	Mus musculus 0 day neonate eyeball cDNA, RIKEN full-length enriched library, clone:E130119P06 product:hypothetical G-protein beta WD-40 repeats containing protein, full insert sequence.	235380	chr9	54263451	54349433	GO:0008150(biological_process)	GO:0008021(synaptic vesicle)	GO:0017137(Rab GTPase binding)	Mm.93636	TC1587772///TC1598580///TC1653829	ENSMUST00000047765
AK076641	0.0159488	1.88122	down	0.00292494	1.61862	up	95.5895	59.0776	113.136	103.638	96.1214	87.0093	60.8631	63.4001	52.9697	132.671	124.064	82.6746	AK076641	Ttc39a	4922503N01Rik,MGC37599	Mus musculus adult male testis cDNA, RIKEN full-length enriched library, clone:4922503N01 product:hypothetical P-loop containing nucleotide triphosphate hydrolases structure containing protein, full insert sequence.	230603	chr4	109088252	109117350			GO:0003676(nucleic acid binding)	Mm.33091	TC1579656	ENSMUST00000064129
AK077220	0.0477506	1.5387	down	0.0142127	1.73033	up	97.5558	57.1539	87.2696	98.4641	103.631	90.5719	43.7655	63.166	64.5302	101.213	75.1302	85.4659	AK077220	Mbtps2	9630032G22Rik,AI662535,MGC25655	Mus musculus adult male testis cDNA, RIKEN full-length enriched library, clone:4933435M21 product:weakly similar to MEMBRANE-BOUND TRANSCRIPTION FACTOR SITE 2 PROTEASE (EC 3.4.24.-) (SITE-2 PROTEASE) (STEROL-REGULATORY ELEMENT-BINDING PROTEINS INTRAMEMBRANE PROTEASE) [Cricetulus griseus], full insert sequence.	270669	chrX	153973302	154006937	GO:0006508(proteolysis);GO:0006629(lipid metabolic process);GO:0008202(steroid metabolic process);GO:0008203(cholesterol metabolic process)	GO:0005622(intracellular);GO:0016020(membrane);GO:0016021(integral to membrane)	GO:0003676(nucleic acid binding);GO:0004222(metalloendopeptidase activity);GO:0005515(protein binding);GO:0008233(peptidase activity);GO:0008237(metallopeptidase activity);GO:0008270(zinc ion binding);GO:0016787(hydrolase activity);GO:0046872(metal ion binding)	Mm.37577	TC1581144///TC1588555	ENSMUST00000058098///ENSMUST00000065806
AK078282	0.0276297	1.6226	down	0.00599274	2.0238	up	208.673	103.157	167.783	248.678	190.699	186.643	122.874	89.5155	97.0812	158.969	203.077	141.303	AK078282	Gm3435	FLJ11152	Mus musculus adult male olfactory brain cDNA, RIKEN full-length enriched library, clone:6430567E09 product:similar to CDNA FLJ11152 FIS, CLONE PLACE1006901 (FRAGMENT) [Homo sapiens], full insert sequence.	100041621	chr17	15115831	15126375
AK079855	0.000590046	1.57257	down	0.00651971	1.68244	up	366.502	216.037	339.869	361.223	308.517	429.766	228.679	211.193	208.238	361.971	320.377	337.259	AK079855	Mib1	DIP-1,E430019M12Rik,MGC18948,Mib,mKIAA1323	Mus musculus 0 day neonate thymus cDNA, RIKEN full-length enriched library, clone:A430093K07 product:unclassifiable, full insert sequence.	225164	chr18	10813979	10816845	GO:0001568(blood vessel development);GO:0001701(in utero embryonic development);GO:0001756(somitogenesis);GO:0001841(neural tube formation);GO:0001947(heart looping);GO:0006512(ubiquitin cycle);GO:0007219(Notch signaling pathway);GO:0007507(heart development);GO:0045665(negative regulation of neuron differentiation);GO:0045807(positive regulation of endocytosis)	GO:0016020(membrane);GO:0031410(cytoplasmic vesicle)	GO:0005515(protein binding);GO:0008270(zinc ion binding);GO:0016874(ligase activity);GO:0046872(metal ion binding)	Mm.21500	TC1610778///TC1584694///TC1576637	ENSMUST00000052838
AK080296	0.0179229	1.69632	down	0.00224629	2.34255	up	170.616	73.4328	123.967	162.566	159.127	190.156	58.5208	78.8641	82.9135	132.074	135.302	104.524	AK080296	5530601H04Rik	AI835882	Mus musculus 3 days neonate thymus cDNA, RIKEN full-length enriched library, clone:A630040C03 product:RIKEN cDNA 5530601H04 gene, full insert sequence.	71445	chrX	102236739	102265435				Mm.242968	TC1597339///TC1691513
AK081304	0.013863	2.27534	down	0.0400929	1.7583	up	130.368	76.0704	169.266	115.697	143.656	131.75	91.4241	84.8723	51.9149	155.014	198.81	153.975	AK081304	Col11a1	C530001D20Rik,cho	Mus musculus 16 days embryo head cDNA, RIKEN full-length enriched library, clone:C130002K24 product:procollagen, type XI, alpha 1, full insert sequence.	12814	chr3	113733457	113797828	GO:0001502(cartilage condensation);GO:0006029(proteoglycan metabolic process);GO:0006817(phosphate transport);GO:0007155(cell adhesion);GO:0030199(collagen fibril organization)	GO:0005578(proteinaceous extracellular matrix);GO:0005581(collagen);GO:0005737(cytoplasm)	GO:0005198(structural molecule activity);GO:0005201(extracellular matrix structural constituent);GO:0030020(extracellular matrix structural constituent conferring tensile strength)	Mm.209715	NP1476528///TC1579972	ENSMUST00000092155
AK081990	0.0145385	2.22621	down	0.000621107	2.06785	up	398.319	192.839	441.865	384.252	435.822	374.883	204.961	171.132	202.424	542.98	485.39	297.225	AK081990	Igsf10	6530405F15Rik,9030224D03,AA409708,AA536958,AI414626,Adlican2,CMF608	Mus musculus 16 days embryo head cDNA, RIKEN full-length enriched library, clone:C130092D21 product:hypothetical Immunoglobulin and major histocompatibility complex domain/Immunoglobulin C-2 type/Immunoglobulin-like/Immunoglobulin subtype containing protein, full insert sequence.	242050	chr3	59121846	59132793	GO:0001503(ossification)		GO:0005515(protein binding)	Mm.444186///Mm.436533	TC1612178///TC1652098	ENSMUST00000039419
AK082292	0.0251944	1.51003	down	0.0254551	1.54929	up	122.044	79.518	118.718	135.962	117.934	112.236	96.8733	66.0623	75.6183	122.803	123.358	109.993	AK082292	Lsm11	2210404M20Rik,AV079530	Mus musculus 0 day neonate cerebellum cDNA, RIKEN full-length enriched library, clone:C230033K11 product:hypothetical Small nuclear ribonucleoprotein (Sm protein) containing protein, full insert sequence.	72290	chr11	45744581	45758437	GO:0006397(mRNA processing);GO:0008380(RNA splicing);GO:0016071(mRNA metabolic process)	GO:0005634(nucleus);GO:0005732(small nucleolar ribonucleoprotein complex);GO:0030529(ribonucleoprotein complex)	GO:0003723(RNA binding)	Mm.249827	TC1583650	ENSMUST00000062458
AK082565	0.0164823	1.85093	down	0.0454566	1.87562	up	88.9782	47.1315	85.873	102.977	62.205	101.753	34.7459	52.6049	54.0436	96.3399	79.6944	81.5847	AK082565	Fkbp15	BB131447,C430014M02Rik,FKBO133,FKBP133,KIAA0674,MGC169330,mKIAA0674	Mus musculus 0 day neonate cerebellum cDNA, RIKEN full-length enriched library, clone:C230064E22 product:hypothetical protein KIAA0674 (fragment) homolog [Homo sapiens], full insert sequence.	338355	chr4	61979659	62021528	GO:0006457(protein folding)	GO:0005884(actin filament);GO:0030424(axon);GO:0030426(growth cone)	GO:0003755(peptidyl-prolyl cis-trans isomerase activity);GO:0016853(isomerase activity)	Mm.357792	TC1598143///TC1614287///TC1597838///TC1625791///TC1598153///TC1597176	ENSMUST00000098033///ENSMUST00000084527///ENSMUST00000084528
AK083281	0.00138507	2.66802	down	0.0333465	2.12622	up	152.54	69.4465	183.788	102.241	143.302	212.078	58.4289	84.2185	65.6921	194.958	194.515	161.892	AK083281	Hs6st2	6OST2	Mus musculus adult male hippocampus cDNA, RIKEN full-length enriched library, clone:C630033N10 product:heparan sulfate 6-O-sulfotransferase 2, full insert sequence.	50786	chrX	48740388	49033654		GO:0005615(extracellular space);GO:0016020(membrane);GO:0016021(integral to membrane)	GO:0016740(transferase activity)	Mm.252561	TC1611936///TC1707269///TC1591327
AK084907	0.0128099	1.73886	down	0.0310734	1.77583	up	214.955	120.219	207.425	169.278	203.683	271.904	108.08	104.844	147.732	209.816	182.106	230.353	AK084907	Xpo4	B430309A01Rik,mKIAA1721	Mus musculus 13 days embryo lung cDNA, RIKEN full-length enriched library, clone:D430008F02 product:exportin 4, full insert sequence.	57258	chr14	58248193	58283793	GO:0006810(transport);GO:0015031(protein transport)	GO:0005634(nucleus)	GO:0005488(binding)	Mm.202747	TC1761282///TC1612652	ENSMUST00000089482
AK086699	0.0177451	1.69314	down	0.00353954	1.64868	up	548.849	333.774	570.564	513.693	595.956	536.899	290.602	347.142	363.578	489.145	709.774	512.773	AK086699	Farp2	AI465173,BC009153,D030026M03Rik,Fir,KIAA0793,mKIAA0793	Mus musculus 15 days embryo head cDNA, RIKEN full-length enriched library, clone:D930046G03 product:hypothetical Serine-rich region/Band 4.1 family containing protein, full insert sequence.	227377	chr1	95408701	95477871	GO:0007242(intracellular signaling cascade);GO:0016322(neuron remodeling);GO:0016601(Rac protein signal transduction);GO:0035023(regulation of Rho protein signal transduction)	GO:0005622(intracellular);GO:0005737(cytoplasm);GO:0005856(cytoskeleton);GO:0016020(membrane)	GO:0005085(guanyl-nucleotide exchange factor activity);GO:0005089(Rho guanyl-nucleotide exchange factor activity);GO:0005488(binding);GO:0008092(cytoskeletal protein binding)	Mm.243091	TC1578281	ENSMUST00000041983
AK086914	0.00432993	1.87935	down	0.000746733	1.50243	up	307.166	204.308	388.079	294.048	297.97	329.481	213.001	195.286	204.637	368.928	468.216	327.094	AK086914	Gpc4	9530073D23Rik,AF311610,AI385680,AI661372,K-glypican	Mus musculus 0 day neonate lung cDNA, RIKEN full-length enriched library, clone:E030011F10 product:unclassifiable, full insert sequence.	14735	chrX	49404067	49405714		GO:0005578(proteinaceous extracellular matrix);GO:0005615(extracellular space);GO:0016020(membrane)	GO:0048503(GPI anchor binding)	Mm.1528///Mm.434818	TC1581967	ENSMUST00000033450
AK087179	0.00600424	1.65715	down	0.0475199	1.82001	up	164.337	86.7354	144.59	106.918	218.251	167.843	80.3727	88.5525	91.2811	163.363	148.712	121.696	AK087179	Osmr	OSMRB	Mus musculus 0 day neonate lung cDNA, RIKEN full-length enriched library, clone:E030032F15 product:oncostatin receptor, full insert sequence.	18414	chr15	6786757	6824283	GO:0007166(cell surface receptor linked signal transduction)	GO:0005615(extracellular space);GO:0005887(integral to plasma membrane);GO:0016020(membrane);GO:0016021(integral to membrane)	GO:0004872(receptor activity);GO:0004896(hematopoietin/interferon-class (D200-domain) cytokine receptor activity);GO:0004924(oncostatin-M receptor activity)	Mm.10760	TC1580811	ENSMUST00000022746
AK087303	0.00709488	1.9301	down	0.0109814	1.76859	up	265.49	151.54	289.908	247.995	251.691	296.784	181.914	149.92	122.786	275.744	326.728	267.252	AK087303	Utrn	AA589569,DRP,Dmdl	Mus musculus 0 day neonate lung cDNA, RIKEN full-length enriched library, clone:E030042O06 product:utrophin, full insert sequence.	22288	chr10	12386220	12408660	GO:0006935(chemotaxis);GO:0006936(muscle contraction);GO:0007165(signal transduction);GO:0007517(muscle development);GO:0007527(adult somatic muscle development)	GO:0005624(membrane fraction);GO:0005856(cytoskeleton);GO:0005886(plasma membrane);GO:0016020(membrane);GO:0030054(cell junction);GO:0045202(synapse)	GO:0003779(actin binding);GO:0004888(transmembrane receptor activity);GO:0005198(structural molecule activity);GO:0005509(calcium ion binding);GO:0005515(protein binding);GO:0008270(zinc ion binding)	Mm.331784	TC1597956///TC1675774///TC1603351///TC1592750	ENSMUST00000076817///ENSMUST00000064997
AK087922	0.0105663	2.15952	down	0.0216949	1.74966	up	4924.97	2759.54	6121.44	3583.39	5469.65	5721.88	2574.28	2889.5	2814.84	8099.61	5686.51	4578.22	AK087922	Fbln2	5730577E14Rik	Mus musculus 2 days neonate thymus thymic cells cDNA, RIKEN full-length enriched library, clone:E430001A04 product:fibulin 2, full insert sequence.	14115	chr6	91215872	91219210		GO:0005576(extracellular region);GO:0005578(proteinaceous extracellular matrix)	GO:0005509(calcium ion binding);GO:0005515(protein binding)	Mm.249146	TC1675130	ENSMUST00000041544
AK088652	0.0469648	1.89928	down	0.0202912	2.098	up	174.069	85.5534	159.357	153.271	175.856	193.079	60.651	115.701	80.3083	189.448	165.421	123.203	AK088652	Mtbp	AI429604,MDM2BP	Mus musculus 2 days neonate thymus thymic cells cDNA, RIKEN full-length enriched library, clone:E430022N15 product:weakly similar to MDM2 BINDING PROTEIN [Mus musculus], full insert sequence.	105837	chr15	55408334	55457978	GO:0007089(traversing start control point of mitotic cell cycle);GO:0008285(negative regulation of cell proliferation)		GO:0005515(protein binding)	Mm.390829	TC1578148	ENSMUST00000022998
AK089197	0.0172911	1.87487	down	0.00047418	2.50998	up	170.873	67.9666	129.989	148.487	178.768	185.366	72.7008	70.4133	60.7857	123.64	167.022	99.3063	AK089197	Setdb2	Clld8,Gm293,KMT1F	Mus musculus NOD-derived CD11c +ve dendritic cells cDNA, RIKEN full-length enriched library, clone:F630035N16 product:hypothetical protein, full insert sequence.	239122	chr14	60041357	60059714	GO:0016568(chromatin modification)	GO:0005634(nucleus)	GO:0003677(DNA binding);GO:0008168(methyltransferase activity);GO:0008270(zinc ion binding);GO:0016740(transferase activity);GO:0018024(histone-lysine N-methyltransferase activity)	Mm.217269	TC1587705
AK089302	0.0029734	1.53826	down	0.000363455	1.70511	up	1298.47	760.894	1173.97	1396.37	1277.03	1221.99	795.328	763.176	724.178	1156.78	1306.57	1058.58	AK089302	N/A	N/A	Mus musculus B6-derived CD11 +ve dendritic cells cDNA, RIKEN full-length enriched library, clone:F730003F10 product:Warning: possibly reversed clone, full insert sequence.	N/A	chr12	4274693	4354509
AK129201	0.0202744	1.57	down	0.00332788	1.62873	up	612.145	374.665	595.14	537.051	678.129	621.255	377.588	397.612	348.797	717.246	482.024	586.151	AK129201	Dst	2310001O04Rik,A830042E19Rik,AW554249,BP230,BPAG1-n,Bpag,Bpag1,Macf2,ah,athetoid,dt,mKIAA0728,nmf203,nmf339	Mus musculus mRNA for mKIAA0728 protein.	13518	chr1	34282353	34319096	GO:0007050(cell cycle arrest);GO:0007155(cell adhesion);GO:0008090(retrograde axon cargo transport);GO:0031110(regulation of microtubule polymerization or depolymerization);GO:0031122(cytoplasmic microtubule organization and biogenesis);GO:0045104(intermediate filament cytoskeleton organization and biogenesis)	GO:0005737(cytoplasm);GO:0005856(cytoskeleton);GO:0015629(actin cytoskeleton);GO:0015630(microtubule cytoskeleton);GO:0016023(cytoplasmic membrane-bound vesicle);GO:0030056(hemidesmosome)	GO:0003779(actin binding);GO:0005198(structural molecule activity);GO:0005200(structural constituent of cytoskeleton);GO:0005509(calcium ion binding);GO:0005515(protein binding);GO:0008017(microtubule binding)	Mm.336625	TC1623274///TC1595050///TC1661495///TC1598453///TC1598767	ENSMUST00000088270///ENSMUST00000088216///ENSMUST00000097785
AK129237	0.0216159	1.53506	down	0.0216212	1.6793	up	321.091	192.281	291.597	292.77	294.17	376.332	213.308	212.663	150.873	295.962	300.125	278.705	AK129237	Crkrs	1810022J16Rik,AI646528,Crk7,D11Ertd752e,MGC141525,Pksc	Mus musculus mRNA for mKIAA0904 protein.	69131	chr11	98064627	98112681	GO:0006468(protein amino acid phosphorylation)		GO:0000166(nucleotide binding);GO:0004672(protein kinase activity);GO:0004674(protein serine/threonine kinase activity);GO:0005524(ATP binding);GO:0016301(kinase activity);GO:0016740(transferase activity)	Mm.440470	TC1580366///TC1608254///TC1641906///TC1640090///TC1692470	ENSMUST00000003203///ENSMUST00000092733
AK131707	0.007349	1.51897	down	0.00482546	1.93385	up	195.218	99.7805	152.332	156.556	230.683	198.416	103.888	94.0999	101.354	130.747	170.26	155.99	AK131707	BC016423	AI645998,KIAA2006,MGC25933,Pap20,mKIAA2006	Mus musculus adult male testis cDNA, RIKEN full-length enriched library, clone:1700017K15 product:hypothetical Serine/threonine-specific protein phosphatase and bis(5-nucleosyl)-tetraphosphatase containing protein, full insert sequence.	105203	chr13	3565280	3584619			GO:0004872(receptor activity);GO:0016787(hydrolase activity)	Mm.221609	TC1583945///TC1597017	ENSMUST00000042415///ENSMUST00000096068///ENSMUST00000096069
AK132403	0.0274021	1.50324	down	0.00848908	1.71916	up	404.022	236.758	353.922	365.17	429.579	417.316	245.095	271.71	193.471	392.534	312.938	356.294	AK132403	Dbf4	AA545217,Ask	Mus musculus 14 days embryo liver cDNA, RIKEN full-length enriched library, clone:4432411O06 product:DBF4-related protein, full insert sequence.	27214	chr5	8397010	8422606	GO:0006260(DNA replication);GO:0007049(cell cycle);GO:0007089(traversing start control point of mitotic cell cycle);GO:0007090(regulation of S phase of mitotic cell cycle)	GO:0005622(intracellular);GO:0005634(nucleus)	GO:0003676(nucleic acid binding);GO:0004674(protein serine/threonine kinase activity);GO:0005515(protein binding);GO:0008270(zinc ion binding);GO:0016301(kinase activity);GO:0046872(metal ion binding)	Mm.292470	TC1593665///TC1590466///TC1578417	ENSMUST00000002368
AK132660	0.0224661	1.83976	down	0.00669919	2.31114	up	172.216	75.8753	137.362	172.969	153.106	190.574	75.2912	56.895	95.4396	151.559	117.197	143.33	AK132660	Smek2	AW011752,AW557776,KIAA1387,mKIAA1387	Mus musculus adult male testis cDNA, RIKEN full-length enriched library, clone:4921508N21 product:Hypothetical Combined RanBP1/wasp domain homolog [Mus musculus], full insert sequence.	104570	chr11	29073746	29113820				Mm.276386	TC1627884///TC1572886	ENSMUST00000102856
AK132725	0.0169251	1.52858	down	0.0260769	1.76132	up	224.6	126.687	191.875	282.679	183.978	207.142	102.961	145.437	131.662	184.745	204.452	186.427	AK132725	Whsc1l1	6720429E03,A530023P05,AI528490,NSD3,WHISTLE	Mus musculus adult male testis cDNA, RIKEN full-length enriched library, clone:4922503C15 product:Putative chromatin modulator homolog [Homo sapiens], full insert sequence.	234135	chr8	26804604	26830139	GO:0006350(transcription);GO:0006355(regulation of transcription, DNA-dependent);GO:0016568(chromatin modification)	GO:0005634(nucleus)	GO:0005515(protein binding);GO:0008168(methyltransferase activity);GO:0008270(zinc ion binding);GO:0016740(transferase activity);GO:0018024(histone-lysine N-methyltransferase activity);GO:0046872(metal ion binding)	Mm.217337	TC1708692///TC1603828///TC1579341	ENSMUST00000033974///ENSMUST00000084026
AK132895	0.0367883	1.71788	down	0.0450291	1.81045	up	511.692	285.037	479.515	431.54	451.815	651.722	376.385	219.297	259.43	511.223	514.951	412.371	AK132895	Kifc3	AI325457,BB123200	Mus musculus adult male testis cDNA, RIKEN full-length enriched library, clone:4930502J08 product:kinesin family member C3, full insert sequence.	16582	chr8	97624114	97637242	GO:0007017(microtubule-based process);GO:0007018(microtubule-based movement);GO:0007030(Golgi organization and biogenesis)	GO:0005794(Golgi apparatus);GO:0005871(kinesin complex);GO:0005874(microtubule);GO:0005875(microtubule associated complex);GO:0016020(membrane)	GO:0000166(nucleotide binding);GO:0003774(motor activity);GO:0003777(microtubule motor activity);GO:0005524(ATP binding);GO:0008569(minus-end-directed microtubule motor activity)	Mm.378951	TC1671396///TC1576344	ENSMUST00000034240
AK132974	0.0152524	1.74154	down	0.0403108	1.52468	up	145.297	96.1135	165.744	139.347	130.215	166.327	108.047	74.4784	105.815	160.205	150.563	186.464	AK132974	Tmem194	MGC40914	Mus musculus adult male testis cDNA, RIKEN full-length enriched library, clone:4930539I06 product:hypothetical protein, full insert sequence.	210035	chr10	127104199	127138103		GO:0016020(membrane);GO:0016021(integral to membrane)		Mm.251075	TC1667352///TC1586657	ENSMUST00000048099
AK133215	0.0021038	1.65867	down	0.002071	1.67698	up	198.95	119.115	196.743	196.564	208.217	192.07	127.921	126.044	103.379	194.883	204.305	191.04	AK133215	Agtpbp1	1700020N17Rik,2310001G17Rik,2900054O13Rik,4930445M19Rik,5730402G09Rik,BB114605,CCP1,MGC90651,Nna1,mKIAA1035,nmf243,pcd	Mus musculus adult male testis cDNA, RIKEN full-length enriched library, clone:4932417H12 product:ATP/GTP binding protein 1, full insert sequence.	67269	chr13	59594764	59658640	GO:0006508(proteolysis);GO:0042133(neurotransmitter metabolic process);GO:0050905(neuromuscular process)	GO:0005634(nucleus);GO:0005737(cytoplasm)	GO:0004182(carboxypeptidase A activity)	Mm.153008	TC1578973///TC1622241///TC1603506///TC1606364	ENSMUST00000022040
AK133347	0.0110791	1.68572	down	0.00263498	2.86602	up	126.374	43.9816	73.4671	116.624	106.045	156.453	53.3349	41.2654	37.3445	79.7234	67.3215	73.3564	AK133347	Pcf11	2500001H09Rik,5730417B17Rik,C77803,KIAA0824	Mus musculus adult male testis cDNA, RIKEN full-length enriched library, clone:4932438F11 product:similar to Pre-mRNA cleavage complex II protein Pcf11 (Fragment) [Homo sapiens], full insert sequence.	74737	chr7	99792764	99810586				Mm.288645	TC1581083///TC1676164///TC1597638	ENSMUST00000040360
AK134600	0.0257788	2.13993	down	0.000447964	2.86829	up	219.926	76.1763	170.172	260.819	195.844	203.114	72.712	82.7094	73.1077	229.265	171.981	109.27	AK134600	Ak3l1	Ak-3,Ak-4,Ak3,Ak4,D4Ertd274e	Mus musculus adult male medulla oblongata cDNA, RIKEN full-length enriched library, clone:6330443H16 product:adenylate kinase 4, full insert sequence.	11639	chr4	101091893	101139600	GO:0006139(nucleobase, nucleoside, nucleotide and nucleic acid metabolic process)	GO:0005739(mitochondrion)	GO:0000166(nucleotide binding);GO:0004017(adenylate kinase activity);GO:0005524(ATP binding);GO:0005525(GTP binding);GO:0016301(kinase activity);GO:0016740(transferase activity);GO:0016776(phosphotransferase activity, phosphate group as acceptor);GO:0019201(nucleotide kinase activity)	Mm.42040	TC1633587	ENSMUST00000102780
AK135499	0.0016921	1.61268	down	0.00436085	1.76807	up	108.104	60.8084	98.072	110.777	122.494	91.0396	64.3541	62.5137	55.5575	107.098	94.1135	93.0049	AK135499	Zmym2	5830413P05Rik,FIM,MGC51607,MYM,RAMP,SCLL,Zfp198	Mus musculus 12 days embryo female mullerian duct includes surrounding region cDNA, RIKEN full-length enriched library, clone:6820437K22 product:zinc finger protein 198, full insert sequence.	76007	chr14	57505681	57560964	GO:0006350(transcription);GO:0006355(regulation of transcription, DNA-dependent)	GO:0005634(nucleus)	GO:0005515(protein binding);GO:0008270(zinc ion binding);GO:0016491(oxidoreductase activity);GO:0046872(metal ion binding);GO:0046914(transition metal ion binding)	Mm.31417	TC1602434///TC1654986///TC1729428	ENSMUST00000089508
AK138649	0.00121222	1.52741	down	0.00217002	1.65541	up	268.935	162.203	247.533	293.164	240.351	273.29	174.237	150.579	161.793	256.605	252.965	233.029	AK138649	Cdc42bpa	A930014J19Rik,DMPK-like,MGC189823	Mus musculus adult male spinal cord cDNA, RIKEN full-length enriched library, clone:A330093C21 product:Ser-thr protein kinase PK428 homolog [Homo sapiens], full insert sequence.	226751	chr1	181890890	182031403	GO:0000226(microtubule cytoskeleton organization and biogenesis);GO:0006468(protein amino acid phosphorylation);GO:0007097(nuclear migration);GO:0007242(intracellular signaling cascade)		GO:0000166(nucleotide binding);GO:0004672(protein kinase activity);GO:0004674(protein serine/threonine kinase activity);GO:0005083(small GTPase regulator activity);GO:0005524(ATP binding);GO:0005529(sugar binding);GO:0008270(zinc ion binding);GO:0016301(kinase activity);GO:0016740(transferase activity);GO:0019992(diacylglycerol binding);GO:0046872(metal ion binding)	Mm.259655	TC1629719///TC1644428///TC1634752	ENSMUST00000076687
AK139255	0.0425524	1.79228	down	0.0490355	1.67387	up	357.422	220.403	384.875	373.69	339.433	359.142	288.159	219.442	153.608	446.197	342.518	365.909	AK139255	Suv420h1	AA117471,C630029K18Rik,KMT5B,MGC18702,Suv4-20h1	Mus musculus 7 days neonate cerebellum cDNA, RIKEN full-length enriched library, clone:A730081E23 product:hypothetical Nuclear protein SET/SET domain profile containing protein, full insert sequence.	225888	chr19	3768021	3816391	GO:0006350(transcription);GO:0006355(regulation of transcription, DNA-dependent);GO:0016568(chromatin modification);GO:0016571(histone methylation)	GO:0000780(condensed nuclear chromosome, pericentric region);GO:0005634(nucleus);GO:0005694(chromosome)	GO:0008168(methyltransferase activity);GO:0016740(transferase activity);GO:0018024(histone-lysine N-methyltransferase activity);GO:0042799(histone lysine N-methyltransferase activity (H4-K20 specific))	Mm.278578	TC1589642///TC1596357	ENSMUST00000005518///ENSMUST00000052699
AK139338	0.0131738	1.67866	down	0.00551758	1.94174	up	296.446	153.572	256.276	277.334	275.708	336.296	163.45	173.188	124.079	288.593	230.869	249.366	AK139338	Mib1	DIP-1,E430019M12Rik,MGC18948,Mib,mKIAA1323	Mus musculus 10 days neonate cortex cDNA, RIKEN full-length enriched library, clone:A830015A18 product:mindbomb homolog 1 (Drosophila), full insert sequence.	225164	chr18	10725622	10755697	GO:0001568(blood vessel development);GO:0001701(in utero embryonic development);GO:0001756(somitogenesis);GO:0001841(neural tube formation);GO:0001947(heart looping);GO:0006512(ubiquitin cycle);GO:0007219(Notch signaling pathway);GO:0007507(heart development);GO:0045665(negative regulation of neuron differentiation);GO:0045807(positive regulation of endocytosis)	GO:0016020(membrane);GO:0031410(cytoplasmic vesicle)	GO:0005515(protein binding);GO:0008270(zinc ion binding);GO:0016874(ligase activity);GO:0046872(metal ion binding)	Mm.21500	TC1610778///TC1584694///TC1576637	ENSMUST00000052838
AK139572	0.0406821	1.59957	down	0.0122216	2.14055	up	104.373	49.6679	77.5364	119.162	91.0681	102.89	48.4842	36.916	63.6036	76.8224	76.3014	79.4854	AK139572	A630001G21Rik	-	Mus musculus 2 cells egg cDNA, RIKEN full-length enriched library, clone:B020005F13 product:hypothetical Sp100 containing protein, full insert sequence.	319997	chr1	87614266	87675218		GO:0005634(nucleus)		Mm.116691	TC1677259	ENSMUST00000064788
AK140307	0.00513315	1.8283	down	0.000873146	2.12849	up	618.66	289.618	533.999	607.163	545.908	702.908	284.318	271.231	313.303	643.989	491.623	466.385	AK140307	Tead1	Gtrgeo5,TEAD-1,TEF-1,Tcf13,mTEF-1	Mus musculus adult male adrenal gland cDNA, RIKEN full-length enriched library, clone:B330014J05 product:TEA domain family member 1, full insert sequence.	21676	chr7	119823106	120043504	GO:0006350(transcription);GO:0006355(regulation of transcription, DNA-dependent);GO:0007507(heart development);GO:0045944(positive regulation of transcription from RNA polymerase II promoter)	GO:0005634(nucleus);GO:0005667(transcription factor complex)	GO:0003677(DNA binding);GO:0003700(transcription factor activity);GO:0005515(protein binding);GO:0016563(transcriptional activator activity)	Mm.28081	TC1584118	ENSMUST00000059768
AK141213	0.0178087	1.82765	down	0.0195451	2.10769	up	74.5132	34.9331	63.5973	61.2847	62.8916	99.3633	27.1029	39.0216	38.6748	60.2825	76.0227	54.4867	AK141213	Cd6	-	Mus musculus ES cells cDNA, RIKEN full-length enriched library, clone:C330008J18 product:CD6 antigen, full insert sequence.	12511	chr19	10863828	10873234	GO:0007155(cell adhesion)	GO:0005886(plasma membrane);GO:0016020(membrane);GO:0016021(integral to membrane)	GO:0004720(protein-lysine 6-oxidase activity);GO:0005044(scavenger receptor activity);GO:0005507(copper ion binding);GO:0005515(protein binding)	Mm.290897	NP055884	ENSMUST00000025572///ENSMUST00000080292
AK141227	0.00510277	1.55271	down	0.000947261	1.64424	up	139.149	84.3808	131.797	124.883	150.964	141.601	83.6208	86.366	83.1556	149.048	113.782	132.562	AK141227	Bard1	ENSMUSG00000060893,ENSMUSG00000073653	Mus musculus ES cells cDNA, RIKEN full-length enriched library, clone:C330018N20 product:hypothetical protein, full insert sequence.	12021	chr1	71074112	71075238	GO:0001894(tissue homeostasis);GO:0006355(regulation of transcription, DNA-dependent);GO:0006974(response to DNA damage stimulus);GO:0007050(cell cycle arrest);GO:0016567(protein ubiquitination);GO:0031441(negative regulation of mRNA 3'-end processing);GO:0042325(regulation of phosphorylation);GO:0043065(positive regulation of apoptosis);GO:0043066(negative regulation of apoptosis);GO:0045732(pos…	GO:0000151(ubiquitin ligase complex);GO:0005622(intracellular);GO:0005634(nucleus);GO:0005737(cytoplasm);GO:0031436(BRCA1-BARD1 complex)	GO:0003677(DNA binding);GO:0003700(transcription factor activity);GO:0003723(RNA binding);GO:0004842(ubiquitin-protein ligase activity);GO:0005515(protein binding);GO:0008270(zinc ion binding);GO:0019900(kinase binding);GO:0042803(protein homodimerization activity);GO:0046872(metal ion binding);GO:0046982(protein heterodimerization activity)	Mm.10764	TC1585274	ENSMUST00000027393
AK141660	0.0343686	1.78626	down	0.0209796	1.79177	up	717.942	400.243	722.359	834.019	566.618	753.188	487.708	371.604	341.417	703.108	546.983	916.986	AK141660	Xpr1	Rmc-1,Rmc1,Sxv,Syg1,XR	Mus musculus 9 days embryo whole body cDNA, RIKEN full-length enriched library, clone:D030012J20 product:xenotropic and polytropic retrovirus receptor 1, full insert sequence.	19775	chr1	157129312	157264574		GO:0016021(integral to membrane)	GO:0004872(receptor activity)	Mm.266215	NP161018///TC1598602	ENSMUST00000027741
AK142906	0.00311375	2.03648	down	0.000400107	2.41329	up	307.81	128.064	261.24	301.97	329.237	292.221	146.181	114.334	123.678	283.615	281.2	218.904	AK142906	Mdn1	4833432B22Rik,A130070M06,AA958993,D4Abb1e,Gm135	Mus musculus 15 days embryo head cDNA, RIKEN full-length enriched library, clone:D930044I10 product:similar to Midasin (MIDAS-containing protein) [Homo sapiens], full insert sequence.	100019	chr4	32854038	32856263	GO:0043254(regulation of protein complex assembly)	GO:0005634(nucleus)	GO:0000166(nucleotide binding);GO:0005524(ATP binding);GO:0016887(ATPase activity)	Mm.24627	TC1630111///TC1593600	ENSMUST00000071642
AK143421	0.000648758	2.76731	down	0.0146646	2.25709	up	111.935	48.1639	133.46	107.816	149.322	78.6655	51.2514	51.5619	41.6784	143.185	143.966	113.23	AK143421	Igsf10	6530405F15Rik,9030224D03,AA409708,AA536958,AI414626,Adlican2,CMF608	Mus musculus 2 days pregnant adult female ovary cDNA, RIKEN full-length enriched library, clone:E330033K05 product:Bone specific CMF608 homolog [Rattus norvegicus], full insert sequence.	242050	chr3	59133093	59148316	GO:0001503(ossification)		GO:0005515(protein binding)	Mm.444186///Mm.436533	TC1612178///TC1652098	ENSMUST00000039419
AK143780	0.0189576	1.73978	down	0.040738	1.79762	up	333.213	183.452	316.541	273.468	283.301	442.869	225.13	176.981	148.243	363.501	310.863	275.261	AK143780	Dlg1	B130052P05Rik,Dlgh1,KIAA4187,SAP97,mKIAA4187	Mus musculus 6 days neonate spleen cDNA, RIKEN full-length enriched library, clone:F430107E01 product:discs, large homolog 1 (Drosophila), full insert sequence.	13383	chr16	31664124	31873430	GO:0001935(endothelial cell proliferation);GO:0007015(actin filament organization);GO:0007163(establishment and/or maintenance of cell polarity);GO:0008104(protein localization);GO:0016337(cell-cell adhesion);GO:0030866(cortical actin cytoskeleton organization and biogenesis);GO:0040018(positive regulation of body size);GO:0042391(regulation of membrane potential);GO:0045930(negative regulation o…	GO:0005783(endoplasmic reticulum);GO:0005886(plasma membrane);GO:0005913(cell-cell adherens junction);GO:0016020(membrane);GO:0016323(basolateral plasma membrane)	GO:0004385(guanylate kinase activity);GO:0004721(phosphoprotein phosphatase activity);GO:0005515(protein binding);GO:0008092(cytoskeletal protein binding);GO:0015459(potassium channel regulator activity);GO:0019901(protein kinase binding);GO:0019902(phosphatase binding)	Mm.382	TC1599465///TC1590440///TC1630234	ENSMUST00000064477
AK144155	0.0155433	1.97359	down	0.00188377	2.13565	up	245.337	115.146	230.453	232.023	277.714	226.273	98.1749	129.814	117.449	273.267	248.962	169.13	AK144155	Rad50	Mrell,Rad50l	Mus musculus RCB-0035 WEHI-3 cDNA, RIKEN full-length enriched library, clone:G430046N16 product:RAD50 homolog [Mus musculus], full insert sequence.	19360	chr11	53505424	53520821	GO:0006259(DNA metabolic process);GO:0006281(DNA repair);GO:0006974(response to DNA damage stimulus);GO:0007049(cell cycle);GO:0007126(meiosis)	GO:0000781(chromosome, telomeric region);GO:0005634(nucleus);GO:0005694(chromosome);GO:0030870(Mre11 complex)	GO:0000166(nucleotide binding);GO:0004518(nuclease activity);GO:0005524(ATP binding);GO:0008270(zinc ion binding);GO:0016787(hydrolase activity);GO:0046872(metal ion binding)	Mm.4888	TC1578170	ENSMUST00000102756
AK145489	0.0382175	2.2266	down	0.028373	2.45059	up	316.452	138.027	286.896	286.857	309.886	352.614	113.491	212.113	88.4758	289.399	266.924	304.366	AK145489	Gm340	-	Mus musculus blastocyst blastocyst cDNA, RIKEN full-length enriched library, clone:I1C0005G13 product:hypothetical protein, full insert sequence.	381224	chr19	41650356	41660869
AK145779	0.00730582	1.89237	down	0.0319011	1.60115	up	89.1847	56.1767	104.849	81.0017	83.1387	103.414	59.7086	43.4985	65.3231	104.359	99.8426	110.345	AK145779	Kif20b	B130024C23,C330014J10Rik,Mphosph1	Mus musculus blastocyst blastocyst cDNA, RIKEN full-length enriched library, clone:I1C0042L07 product:M-phase phosphoprotein 1, full insert sequence.	240641	chr19	35012742	35050221				Mm.278471	TC1639836///TC1745266///TC1617059	ENSMUST00000036256///ENSMUST00000087349
AK145822	0.0027429	3.35445	down	0.00375437	3.13039	up	142.456	46.4733	152.395	121.553	164.844	140.972	62.4301	41.1188	35.871	136.504	176.045	144.634	AK145822	Fosl2	Fra-2	Mus musculus 15 days pregnant adult female placenta cDNA, RIKEN full-length enriched library, clone:I530001P11 product:fos-like antigen 2, full insert sequence.	14284	chr5	32448893	32460212	GO:0006355(regulation of transcription, DNA-dependent)	GO:0005634(nucleus)	GO:0003677(DNA binding);GO:0003700(transcription factor activity);GO:0046983(protein dimerization activity)	Mm.24684	TC1620210///TC1580363	ENSMUST00000031017
AK147911	0.0166854	1.71451	down	0.0100371	1.61441	up	973.432	603.744	1041.25	909.489	1111.75	899.055	530.673	693.567	586.994	1097.71	827.826	1198.22	AK147911	Dnajc13	D030002L11Rik,Gm1124,KIAA0678,RME-8,Rme8,mKIAA0678	Mus musculus melanocyte cDNA, RIKEN full-length enriched library, clone:G270093M12 product:hypothetical protein, full insert sequence.	235567	chr9	104102766	104165262	GO:0006418(tRNA aminoacylation for protein translation);GO:0006457(protein folding);GO:0008150(biological_process)	GO:0005575(cellular_component)	GO:0003674(molecular_function);GO:0004812(aminoacyl-tRNA ligase activity);GO:0005524(ATP binding);GO:0031072(heat shock protein binding);GO:0051082(unfolded protein binding)	Mm.217256	TC1638908	ENSMUST00000035170
AK148805	0.00841119	1.76861	down	0.0240486	1.56094	up	426.135	275.083	481.879	382.618	421.249	474.537	300.634	306.047	218.568	444.003	516.618	485.016	AK148805	Usp34	A530081C03Rik,Murr2	Mus musculus 2 days neonate sympathetic ganglion cDNA, RIKEN full-length enriched library, clone:7120448K24 product:hypothetical Glutamic acid-rich region profile/Serine-rich region profile containing protein, full insert sequence.	17847	chr11	23206894	23264034	GO:0006511(ubiquitin-dependent protein catabolic process);GO:0006512(ubiquitin cycle)	GO:0005622(intracellular)	GO:0004221(ubiquitin thiolesterase activity);GO:0005097(Rab GTPase activator activity);GO:0008233(peptidase activity);GO:0008234(cysteine-type peptidase activity);GO:0016787(hydrolase activity)	Mm.119155	TC1636357///TC1597778///TC1634653	ENSMUST00000101465
AK154253	0.00907131	1.6233	down	0.00742272	1.65043	up	454.12	276.112	446.874	422.629	507.241	432.492	261.238	245.395	321.704	502.877	413.493	424.252	AK154253	Tlr6	-	Mus musculus NOD-derived CD11c +ve dendritic cells cDNA, RIKEN full-length enriched library, clone:F630012E11 product:toll-like receptor 6, full insert sequence.	21899	chr5	65344333	65351287	GO:0006954(inflammatory response);GO:0006955(immune response);GO:0045087(innate immune response)	GO:0016020(membrane);GO:0016021(integral to membrane)	GO:0004872(receptor activity);GO:0004888(transmembrane receptor activity);GO:0005515(protein binding)	Mm.42146	TC1586507	ENSMUST00000062315
AK154323	0.00594361	1.99686	down	0.00117041	2.82099	up	187.259	67.3477	132.689	182.364	181.294	198.12	55.7221	62.3793	83.9416	140.818	135.412	121.836	AK154323	Map4k2	AI385662,BL44,GCK,MGC143893,MGC143894,Rab8ip	Mus musculus NOD-derived CD11c +ve dendritic cells cDNA, RIKEN full-length enriched library, clone:F630020E23 product:mitogen activated protein kinase kinase kinase kinase 2, full insert sequence.	26412	chr19	6341249	6353527	GO:0006468(protein amino acid phosphorylation);GO:0006903(vesicle targeting);GO:0007243(protein kinase cascade)		GO:0000166(nucleotide binding);GO:0004672(protein kinase activity);GO:0004674(protein serine/threonine kinase activity);GO:0005083(small GTPase regulator activity);GO:0005515(protein binding);GO:0005524(ATP binding);GO:0016301(kinase activity);GO:0016740(transferase activity)	Mm.25860	TC1642236///TC1601407	ENSMUST00000025897
AK154879	0.039817	1.5987	down	0.0130841	3.69621	up	398.133	99.3278	161.812	205.843	416.149	572.408	110.298	92.1204	95.5653	209.114	127.419	148.903	AK154879	Sirpb1	9930027N05Rik,SIRP-beta,Sirpb	Mus musculus NOD-derived CD11c +ve dendritic cells cDNA, RIKEN full-length enriched library, clone:F630110H13 product:Weakly similar to signal-regulatory protein beta-1 precursor homolog [Mus musculus], full insert sequence.	320832	chr3	15495753	15575065	GO:0007242(intracellular signaling cascade);GO:0050766(positive regulation of phagocytosis)	GO:0005886(plasma membrane);GO:0016020(membrane);GO:0016021(integral to membrane)	GO:0004872(receptor activity)	Mm.425126	TC1588672///TC1678925	ENSMUST00000050623///ENSMUST00000099201
AK155717	0.004108	1.69026	down	0.003183	1.73718	up	2700.35	1563.02	2628.17	2783.6	2783.8	2533.64	1623.33	1326.27	1739.47	2658.8	2454.31	2771.41	AK155717	Itgam	CD11b/CD18,CR3,CR3A,Cd11b,F730045J24Rik,Ly-40,MAC1,Mac-1,Mac-1a	Mus musculus B6-derived CD11 +ve dendritic cells cDNA, RIKEN full-length enriched library, clone:F730209H22 product:integrin alpha M, full insert sequence.	16409	chr7	135206153	135271674	GO:0006412(translation);GO:0007155(cell adhesion);GO:0007229(integrin-mediated signaling pathway);GO:0030593(neutrophil chemotaxis);GO:0045123(cellular extravasation);GO:0050798(activated T cell proliferation)	GO:0005622(intracellular);GO:0005634(nucleus);GO:0005840(ribosome);GO:0008305(integrin complex);GO:0009897(external side of plasma membrane);GO:0016020(membrane);GO:0016021(integral to membrane)	GO:0001846(opsonin binding);GO:0001948(glycoprotein binding);GO:0003735(structural constituent of ribosome);GO:0004872(receptor activity);GO:0005509(calcium ion binding);GO:0005515(protein binding)	Mm.262106	TC1590713	ENSMUST00000064821
AK158238	0.0404253	1.51793	down	0.000460432	1.65924	up	295.421	177.644	274.855	306.502	267.907	311.852	176.681	177.749	178.503	337.86	208.859	277.845	AK158238	Med25	2610034E13Rik,2610529E18Rik,ESTM2,X83308	Mus musculus adult inner ear cDNA, RIKEN full-length enriched library, clone:F930044M10 product:similar to TCBAP0758 protein (Fragment) [Homo sapiens], full insert sequence.	75613	chr7	52132134	52140871				Mm.157778	TC1598951///TC1703966///TC1775715	ENSMUST00000003049
AK158414	0.0476263	1.70596	down	0.00439756	2.17416	up	87.8964	40.9296	70.1783	78.7988	90.0564	94.8339	51.2276	37.1921	34.369	71.3333	86.5321	52.6696	AK158414	Cep192	4631422C13Rik,D430014P18Rik	Mus musculus adult inner ear cDNA, RIKEN full-length enriched library, clone:F930115A20 product:hypothetical protein, full insert sequence.	70799	chr18	67959760	67989947	GO:0006412(translation)	GO:0005622(intracellular);GO:0005634(nucleus);GO:0005840(ribosome)	GO:0003677(DNA binding);GO:0003735(structural constituent of ribosome);GO:0005509(calcium ion binding)	Mm.30857	TC1603021///TC1580562	ENSMUST00000025425///ENSMUST00000097537
AK158832	0.0181857	1.51386	down	0.00776881	1.75165	up	236.777	136.363	204.379	215.549	250.636	244.147	128.113	164.584	116.39	214.116	193.278	205.742	AK158832	Arl6	1110018H24Rik,2210411E14Rik,BBS3	Mus musculus visual cortex cDNA, RIKEN full-length enriched library, clone:K430340K12 product:ADP-ribosylation factor-like 6, full insert sequence.	56297	chr16	59613150	59638986	GO:0006471(protein amino acid ADP-ribosylation);GO:0007264(small GTPase mediated signal transduction);GO:0007265(Ras protein signal transduction)	GO:0005622(intracellular);GO:0005737(cytoplasm);GO:0016020(membrane)	GO:0000166(nucleotide binding);GO:0005515(protein binding);GO:0005525(GTP binding)	Mm.392505	TC1640168	ENSMUST00000023405
AK160397	0.0349983	1.56248	down	0.0497793	1.70068	up	642.801	368.076	581.716	839.669	453.351	635.385	323.573	410.135	370.52	733.911	496.713	514.525	AK160397	Lyst	D13Sfk13,beige,bg	Mus musculus adult male cerebellum cDNA, RIKEN full-length enriched library, clone:1500001K01 product:lysosomal trafficking regulator, full insert sequence.	17101	chr13	13801554	13839796	GO:0006810(transport);GO:0006968(cellular defense response);GO:0007165(signal transduction);GO:0008333(endosome to lysosome transport);GO:0015031(protein transport)	GO:0005768(endosome);GO:0015630(microtubule cytoskeleton)		Mm.342337	TC1582891///TC1604249	ENSMUST00000050664
AK161530	0.00155975	1.65002	down	0.00519299	1.64437	up	328.679	198.716	328.522	296.164	305.022	384.85	185.419	207.64	203.09	365.751	307.412	312.403	AK161530	Mga	AV312082,C130042M01Rik,C80739,D030062C11Rik,Mad5	Mus musculus 11 days pregnant adult female ovary and uterus cDNA, RIKEN full-length enriched library, clone:5031429C20 product:MAX gene associated, full insert sequence.	29808	chr2	119766957	119774170	GO:0006355(regulation of transcription, DNA-dependent)	GO:0005634(nucleus);GO:0005667(transcription factor complex)	GO:0003700(transcription factor activity)	Mm.87532	TC1668105///NP582088///TC1650559	ENSMUST00000079934///ENSMUST00000046717
AK162232	0.0283625	1.59746	down	0.0116052	2.10363	up	435.751	207.59	327.978	439.95	349.849	517.452	159.524	227.346	235.902	355.455	289.161	339.318	AK162232	Nexn	1110046H09Rik,AA553326,NELIN	Mus musculus in vitro fertilized eggs cDNA, RIKEN full-length enriched library, clone:7420464F21 product:nexilin, full insert sequence.	68810	chr3	151900577	151911332		GO:0005924(cell-substrate adherens junction)	GO:0051015(actin filament binding)	Mm.200188	TC1580276	ENSMUST00000046045
AK163093	0.0263592	2.29705	down	0.03635	2.34046	up	169.917	74.4254	164.237	119.83	188.827	201.093	50.3837	107.152	65.7408	195.063	158.619	139.029	AK163093	Bod1l	A230054D04Rik,AI853319,FAM44A,mKIAA1327	Mus musculus adult male aorta and vein cDNA, RIKEN full-length enriched library, clone:A530059A07 product:hypothetical protein, full insert sequence.	665775	chr5	42199942	42213399				Mm.158726	TC1620809///TC1639179	ENSMUST00000054549///ENSMUST00000050556
AK163346	0.0269203	1.54498	down	0.0276291	1.68596	up	516.008	306.869	469.177	622.39	441.148	484.487	292.8	375.009	252.797	478.13	421.687	507.715	AK163346	Rnf38	1700065B19Rik,2610202O07Rik,AA673263,Oip1	Mus musculus 2 cells egg cDNA, RIKEN full-length enriched library, clone:B020017H07 product:ring finger protein 38, full insert sequence.	73469	chr4	44139084	44153920	GO:0006512(ubiquitin cycle)		GO:0005515(protein binding);GO:0008270(zinc ion binding);GO:0046872(metal ion binding)	Mm.262859	TC1578526///TC1608556	ENSMUST00000098098
AK163512	0.0391334	1.52614	down	0.000483104	1.68075	up	310.923	184.6	287.077	335.093	284.023	313.652	187.901	186.19	179.709	352.22	290.899	218.112	AK163512	Synj2	AI481647,SJ2,mKIAA0348	Mus musculus adult male corpora quadrigemina cDNA, RIKEN full-length enriched library, clone:B230327A19 product:synaptojanin 2, full insert sequence.	20975	chr17	5975640	6026374		GO:0005575(cellular_component)	GO:0001668(phosphatidylinositol-4,5-bisphosphate 5-phosphatase activity);GO:0003676(nucleic acid binding);GO:0003723(RNA binding);GO:0004437(inositol or phosphatidylinositol phosphatase activity);GO:0004439(phosphoinositide 5-phosphatase activity);GO:0004445(inositol-polyphosphate 5-phosphatase activity);GO:0005515(protein binding);GO:0016787(hydrolase activity)	Mm.444395///Mm.236068	TC1715609///TC1589150///TC1579476	ENSMUST00000080283///ENSMUST00000061091
AK165582	0.0175338	1.54338	down	0.0168477	1.83408	up	192.073	104.335	159.744	238.966	169.659	167.596	125.047	98.9459	89.012	165.994	168.361	144.878	AK165582	Prune2	6330414G02Rik,A230083H22Rik,A330102H22Rik,KIAA0367,mKIAA0367	Mus musculus bone marrow stroma cell CRL-2028 SR-4987 cDNA, RIKEN full-length enriched library, clone:G430027B18 product:Weakly similar to BCL2/adenovirus E1B 19-kDa protein-interacting protein 2, full insert sequence.	353211	chr19	17030607	17296895	GO:0006915(apoptosis)			Mm.257354///Mm.393963	TC1591552///TC1602795///TC1653514	ENSMUST00000067439///ENSMUST00000044176
AK165836	0.0286965	1.58622	down	0.00314213	2.39672	up	127.218	53.265	84.2324	106.313	141.081	134.261	58.6247	58.5764	42.594	98.7242	80.6957	73.2774	AK165836	Acbd6	0610010G04Rik,2610100E10Rik,MGC106946,MGC144461,MGC144462	Mus musculus lung RCB-0558 LLC cDNA, RIKEN full-length enriched library, clone:G730005M08 product:acyl-Coenzyme A binding domain containing 6, full insert sequence.	72482	chr1	157405584	157434924	GO:0008150(biological_process)	GO:0005575(cellular_component)	GO:0000062(acyl-CoA binding);GO:0003674(molecular_function);GO:0005488(binding)	Mm.288249	TC1605548	ENSMUST00000035560
AK166509	0.000298152	1.75686	down	0.000365345	1.58366	up	699.943	442.601	776.953	695.998	715.472	688.359	408.402	457.774	461.628	735.669	800.819	794.372	AK166509	Bat2d	1810043M20Rik,9630039I18Rik,A630006J20,Bat2d1,E130112L15Rik,mKIAA1096	Mus musculus mammary gland RCB-0527 Jyg-MC(B) cDNA, RIKEN full-length enriched library, clone:G930041K07 product:BAT2-iso (Fragment) homolog [Homo sapiens], full insert sequence.	226562	chr1	164634499	164670687	GO:0008150(biological_process)	GO:0005575(cellular_component)	GO:0003674(molecular_function)	Mm.245446	TC1734374///TC1643158///TC1707059///TC1614094	ENSMUST00000046632///ENSMUST00000028016
AK167167	0.0184936	1.5126	down	0.00319071	1.61907	up	131.271	80.9672	123.319	123.607	147.337	122.867	80.4463	87.8789	74.5764	140.448	101.434	128.075	AK167167	N/A	N/A	Mus musculus blastocyst blastocyst cDNA, RIKEN full-length enriched library, clone:I1C0037B07 product:coilin, full insert sequence.	N/A	chr11	88831731	88843964
AK169192	0.0105668	1.70169	down	0.0326207	1.60557	up	128.645	80.5674	135.244	123.434	111.389	151.111	79.9369	97.0796	64.6859	134.526	134.739	136.467	AK169192	Shmt2	2700043D08Rik,AA408223,AA986903	Mus musculus 17 days embryo kidney cDNA, RIKEN full-length enriched library, clone:I920089B02 product:serine hydroxymethyl transferase 2 (mitochondrial), full insert sequence.	108037	chr10	126954194	126959491	GO:0006544(glycine metabolic process);GO:0006563(L-serine metabolic process)	GO:0005739(mitochondrion);GO:0005743(mitochondrial inner membrane)	GO:0004372(glycine hydroxymethyltransferase activity);GO:0008168(methyltransferase activity);GO:0016740(transferase activity);GO:0030170(pyridoxal phosphate binding)	Mm.29890	TC1625285	ENSMUST00000026470
AK170375	0.016822	2.07149	down	0.00992904	2.4931	up	180.408	73.0457	149.123	146.003	223.332	171.89	96.9177	59.5514	62.6679	179.102	140.506	127.76	AK170375	3110056O03Rik	AW550292,PSL1,Sppl2b	Mus musculus NOD-derived CD11c +ve dendritic cells cDNA, RIKEN full-length enriched library, clone:F630101I16 product:Similar to SPPL2b (Fragment) homolog [Mus musculus], full insert sequence.	73218	chr10	80318019	80331453	GO:0006508(proteolysis)	GO:0016020(membrane);GO:0016021(integral to membrane)	GO:0005509(calcium ion binding);GO:0008233(peptidase activity);GO:0008717(D-alanyl-D-alanine endopeptidase activity);GO:0016787(hydrolase activity)	Mm.3285	NP1298967	ENSMUST00000035597
AK170795	0.0106183	1.79358	down	0.00852281	2.44348	up	260.487	106.518	188.011	196.31	288.763	296.388	81.8186	126.206	111.529	185.79	187.726	190.517	AK170795	Foxred2	A430097D04Rik,D15Bwg0759e,Gm304	Mus musculus NOD-derived CD11c +ve dendritic cells cDNA, RIKEN full-length enriched library, clone:F630201B18 product:DJ1119A7.5.2 (Novel protein (Variant 2)) (Fragment) homolog [Homo sapiens], full insert sequence.	239554	chr15	77770955	77787105	GO:0006118(electron transport)		GO:0016491(oxidoreductase activity)	Mm.295605	TC1601948///TC1601772	ENSMUST00000016696
AK171308	0.00654589	1.73743	down	0.00305826	2.29053	up	217.621	95.44	164.195	185.749	224.078	243.035	85.4867	115.808	85.0251	161.074	173.894	157.617	AK171308	Foxred2	A430097D04Rik,D15Bwg0759e,Gm304	Mus musculus NOD-derived CD11c +ve dendritic cells cDNA, RIKEN full-length enriched library, clone:F630330B03 product:weakly similar to DJ1119A7.5.1 (Novel protein (Variant 1)) (Fragment) [Homo sapiens], full insert sequence.	239554	chr15	77770955	77776318	GO:0006118(electron transport)		GO:0016491(oxidoreductase activity)	Mm.295605	TC1601948///TC1601772	ENSMUST00000016696
AK172914	0.0117496	1.77583	down	0.0390761	1.66368	up	212.049	124.295	223.594	184.432	167.786	283.93	113.254	127.674	131.958	274.858	180.3	215.623	AK172914	Lpgat1	AI649174,AW112037,BC013667,KIAA0205,MGC18768	Mus musculus mRNA for mKIAA0205 protein.	226856	chr1	193542375	193602508	GO:0008152(metabolic process);GO:0008654(phospholipid biosynthetic process)	GO:0005575(cellular_component);GO:0005737(cytoplasm);GO:0005783(endoplasmic reticulum);GO:0016020(membrane);GO:0016021(integral to membrane)	GO:0003674(molecular_function);GO:0008415(acyltransferase activity);GO:0016740(transferase activity)	Mm.277958	TC1581499///TC1600870	ENSMUST00000027932///ENSMUST00000094180
AK173077	0.0352382	1.6891	down	0.0292621	1.71629	up	202.207	120.39	199.321	197.678	221.782	187.16	113.726	155.909	91.5364	218.738	175.635	203.59	AK173077	Pikfyve	5230400C17Rik,Pip5k,Pip5k3,Pipk5k3,p235	Mus musculus mRNA for mKIAA0981 protein.	18711	chr1	65233258	65325270	GO:0007242(intracellular signaling cascade);GO:0044267(cellular protein metabolic process);GO:0046488(phosphatidylinositol metabolic process)	GO:0012506(vesicle membrane)	GO:0005515(protein binding);GO:0005524(ATP binding);GO:0008270(zinc ion binding);GO:0016301(kinase activity);GO:0016307(phosphatidylinositol phosphate kinase activity);GO:0016308(1-phosphatidylinositol-4-phosphate 5-kinase activity);GO:0016740(transferase activity);GO:0046872(metal ion binding)	Mm.38370	TC1680172///TC1633973///TC1598965	ENSMUST00000081154///ENSMUST00000097707
AK186533	0.00314829	1.85913	down	0.00199164	1.68624	up	350.911	208.933	388.497	368.539	342.961	341.233	214.558	229.786	182.455	425.606	337.653	402.233	AK186533	N/A	N/A	Mus musculus cDNA, clone:Y0G0137K22, strand:plus, reference:ENSEMBL:Mouse-Transcript-ENST:ENSMUST00000042012, based on BLAT search.	N/A	chr8	113368362	113370640
AK203706	0.0170754	1.9271	down	0.0164972	2.55145	up	232.248	87.9714	171.223	289.425	144.877	262.444	77.8141	105.049	81.051	214.357	133.009	166.303	AK203706	Rab22a	3732413A17Rik,AI662177,AW319644,AW550514,E130120E14Rik,Rab22	Mus musculus cDNA, clone:Y1G0145N18, strand:minus, reference:ENSEMBL:Mouse-Transcript-ENST:ENSMUST00000029024, based on BLAT search.	19334	chr2	173528165	173528467	GO:0006810(transport);GO:0006897(endocytosis);GO:0007032(endosome organization and biogenesis);GO:0007264(small GTPase mediated signal transduction);GO:0015031(protein transport)	GO:0005622(intracellular);GO:0005769(early endosome);GO:0005886(plasma membrane);GO:0016020(membrane)	GO:0000166(nucleotide binding);GO:0005515(protein binding);GO:0005525(GTP binding)	Mm.275304	TC1645537///TC1765104///TC1578364	ENSMUST00000029024
AK205190	0.00117095	2.32763	down	0.0270505	1.63851	up	178.912	107.373	251.566	138.697	174.764	223.274	97.9262	113.579	110.616	230.708	299.303	224.687	AK205190	N/A	N/A	Mus musculus cDNA, clone:Y1G0150O16, strand:unspecified.	N/A	chr18	63112372	63112558
BC005420	0.00426802	5.25616	down	0.0215762	1.60328	up	37.1859	23.0374	130.46	30.7936	44.6812	36.0828	23.4264	25.5942	20.0915	83.5023	206.359	101.518	BC005420	Aass	LKR,LKR/SDH,LOR,LOR/SDH,Lorsdh,SDH	Mus musculus aminoadipate-semialdehyde synthase, mRNA (cDNA clone MGC:5717 IMAGE:3600654), complete cds.	30956	chr6	23022504	23082960	GO:0006118(electron transport);GO:0006979(response to oxidative stress)	GO:0005739(mitochondrion)	GO:0003824(catalytic activity);GO:0004601(peroxidase activity);GO:0010010(lysine-ketoglutarate reductase activity);GO:0016491(oxidoreductase activity);GO:0047130(saccharopine dehydrogenase (NADP+, L-lysine-forming) activity);GO:0047131(saccharopine dehydrogenase (NAD+, L-glutamate-forming) activity)	Mm.18651	TC1778940	ENSMUST00000031707
BC005443	0.00509151	2.13137	down	0.0100296	1.5622	up	2429.49	1546.79	3345.89	2027.59	2638.47	2622.42	1470.53	1486.82	1683.03	4151.55	3225.23	2660.88	BC005443	Fbln2	5730577E14Rik	Mus musculus fibulin 2, mRNA (cDNA clone MGC:6112 IMAGE:3490759), complete cds.	14115	chr6	91162777	91222174		GO:0005576(extracellular region);GO:0005578(proteinaceous extracellular matrix)	GO:0005509(calcium ion binding);GO:0005515(protein binding)	Mm.249146	TC1675130	ENSMUST00000041544
BC005447	0.0165473	1.83984	down	0.00114367	2.44299	up	393.146	160.668	299.396	359.309	361.197	458.932	157.599	142.475	181.929	319.455	225.376	353.358	BC005447	Trim30	Rpt-1,Rpt1	Mus musculus tripartite motif protein 30, mRNA (cDNA clone MGC:6159 IMAGE:3493256), complete cds.	20128	chr7	111557539	111613641	GO:0006350(transcription);GO:0006355(regulation of transcription, DNA-dependent)	GO:0005622(intracellular);GO:0005634(nucleus);GO:0005737(cytoplasm)	GO:0003677(DNA binding);GO:0005515(protein binding);GO:0008270(zinc ion binding);GO:0046872(metal ion binding)	Mm.295578	TC1688935///TC1577477	ENSMUST00000071069///ENSMUST00000076922
BC005534	0.00136823	1.83329	down	0.000699764	1.66256	up	758.491	457.498	838.809	766.68	755.716	753.078	411.374	469.098	492.021	893.403	750.561	872.463	BC005534	Ccng1	AI314029	Mus musculus cyclin G1, mRNA (cDNA clone MGC:7684 IMAGE:3497034), complete cds.	12450	chr11	40562053	40567494	GO:0000074(regulation of progression through cell cycle);GO:0007049(cell cycle);GO:0007067(mitosis);GO:0051301(cell division)	GO:0005634(nucleus)	GO:0016538(cyclin-dependent protein kinase regulator activity)	Mm.2103	TC1573987	ENSMUST00000020576
BC007125	0.00547397	2.26303	down	0.000313433	3.20514	up	139.491	43.4628	99.6946	123.715	134.856	159.903	42.2493	39.1312	49.008	98.2644	123.341	77.4781	BC007125	Aqp1	-	Mus musculus aquaporin 1, mRNA (cDNA clone MGC:5663 IMAGE:3491276), complete cds.	11826	chr6	55286439	55298549	GO:0006810(transport);GO:0006833(water transport)	GO:0005615(extracellular space);GO:0005887(integral to plasma membrane);GO:0016020(membrane);GO:0016021(integral to membrane);GO:0019867(outer membrane)	GO:0005215(transporter activity);GO:0015250(water channel activity);GO:0015288(porin activity)	Mm.18625	TC1595971	ENSMUST00000004774
BC007166	0.000760503	1.56486	down	0.0370283	1.70833	up	211.327	120.486	188.553	146.883	255.944	231.155	117.989	128.572	114.899	201.798	181.725	182.137	BC007166	Epb4.1l4a	Epb4.1l4,NBL4	Mus musculus erythrocyte protein band 4.1-like 4a, mRNA (cDNA clone MGC:7458 IMAGE:3490061), complete cds.	13824	chr18	33956612	34166573		GO:0005737(cytoplasm);GO:0005856(cytoskeleton);GO:0016020(membrane)	GO:0005198(structural molecule activity);GO:0005488(binding);GO:0008092(cytoskeletal protein binding)	Mm.3465	TC1610814///TC1601604	ENSMUST00000025234
BC008571	0.0340333	2.28969	down	0.0219446	1.93298	up	231.674	122.06	284.798	194.6	239.845	260.578	92.8231	159.911	113.447	250.893	404.142	199.358	BC008571	Slc25a17	34kDa,47kDa,PMP34,Pmp47	Mus musculus solute carrier family 25 (mitochondrial carrier, peroxisomal membrane protein), member 17, mRNA (cDNA clone MGC:6724 IMAGE:3587806), complete cds.	20524	chr15	81149346	81191197	GO:0006810(transport);GO:0006839(mitochondrial transport)	GO:0005739(mitochondrion);GO:0005743(mitochondrial inner membrane);GO:0005777(peroxisome);GO:0005778(peroxisomal membrane);GO:0016020(membrane);GO:0016021(integral to membrane)	GO:0005215(transporter activity);GO:0005386(carrier activity);GO:0005488(binding);GO:0005515(protein binding)	Mm.222536	NP378296///TC1574365	ENSMUST00000023040
BC009104	0.0462255	1.52866	down	0.00439779	2.5604	up	152.543	58.7257	90.7393	115.694	152.362	189.572	50.0962	63.295	62.786	112.959	86.3436	72.9151	BC009104	Tceb1	2610043E24Rik,2610301I15Rik,AA407206,AI987979,AW049146	Mus musculus transcription elongation factor B (SIII), polypeptide 1, mRNA (cDNA clone MGC:7222 IMAGE:3483215), complete cds.	67923	chr1	16632845	16646946	GO:0006350(transcription);GO:0006355(regulation of transcription, DNA-dependent);GO:0006512(ubiquitin cycle)	GO:0005634(nucleus)	GO:0005515(protein binding)	Mm.289248	TC1575025
BC010590	0.0372598	1.51916	down	0.0061117	1.89251	up	307.52	162.809	247.841	355.202	272.27	295.088	164.369	187.3	136.758	294.734	240.835	207.956	BC010590	Slc22a4	Octn1	Mus musculus solute carrier family 22 (organic cation transporter), member 4, mRNA (cDNA clone MGC:18328 IMAGE:3670138), complete cds.	30805	chr11	53796627	53841592	GO:0006810(transport);GO:0006811(ion transport);GO:0006814(sodium ion transport)	GO:0005739(mitochondrion);GO:0016020(membrane);GO:0016021(integral to membrane)	GO:0000166(nucleotide binding);GO:0005215(transporter activity);GO:0005524(ATP binding);GO:0015075(ion transporter activity);GO:0015293(symporter activity);GO:0031402(sodium ion binding)	Mm.274590	TC1582427	ENSMUST00000020586
BC012239	0.0130311	1.54581	down	0.0367073	1.68755	up	88.7863	51.6308	79.9569	100.3	63.4513	102.608	46.5585	50.2158	58.118	82.1632	89.308	68.3993	BC012239	Zbtb1	9430077A12,AI256369,Bsg2,C430003J21Rik	Mus musculus zinc finger and BTB domain containing 1, mRNA (cDNA clone MGC:19295 IMAGE:4037044), complete cds.	268564	chr12	77471588	77489441	GO:0006350(transcription);GO:0006355(regulation of transcription, DNA-dependent)	GO:0005622(intracellular);GO:0005634(nucleus)	GO:0003676(nucleic acid binding);GO:0003677(DNA binding);GO:0005515(protein binding);GO:0008270(zinc ion binding);GO:0046872(metal ion binding)	Mm.436765///Mm.77065	TC1587240///TC1579519	ENSMUST00000042779
BC013594	0.0312112	1.82574	down	0.000221742	2.26865	up	146.826	64.6076	121.94	147.45	160.233	132.795	65.0597	68.2306	60.5324	103.764	168.562	93.4949	BC013594	Slco1a5	Oatp3,Slc21a7	Mus musculus solute carrier organic anion transporter family, member 1a5, mRNA (cDNA clone MGC:6720 IMAGE:3586426), complete cds.	108096	chr6	142182749	142227356	GO:0006810(transport);GO:0006811(ion transport)	GO:0005887(integral to plasma membrane);GO:0016020(membrane);GO:0016021(integral to membrane)	GO:0005215(transporter activity);GO:0015125(bile acid transporter activity)	Mm.206599	TC1583452	ENSMUST00000081380
BC013622	0.0188718	1.84569	down	0.00412672	2.10074	up	707.303	334.433	628.247	707.619	578.722	835.569	352.818	359.419	291.061	820.371	550.637	513.733	BC013622	Vldlr	AA408956,AI451093,AW047288	Mus musculus very low density lipoprotein receptor, mRNA (cDNA clone MGC:11509 IMAGE:3968213), complete cds.	22359	chr19	27292073	27324111	GO:0006629(lipid metabolic process);GO:0006810(transport);GO:0006869(lipid transport);GO:0006897(endocytosis);GO:0008202(steroid metabolic process);GO:0008203(cholesterol metabolic process);GO:0045860(positive regulation of protein kinase activity)	GO:0005615(extracellular space);GO:0005624(membrane fraction);GO:0005905(coated pit);GO:0016020(membrane);GO:0016021(integral to membrane)	GO:0004872(receptor activity);GO:0005319(lipid transporter activity);GO:0005509(calcium ion binding)	Mm.393599///Mm.4141	TC1600802///TC1592911	ENSMUST00000025866
BC016100	0.00717572	2.16544	down	0.00248056	2.66715	up	284.927	108.622	231.853	271.103	309.402	274.275	115.051	129.312	81.5027	235.347	255.267	204.945	BC016100	Slc7a4	AI853530,MGC27672	Mus musculus solute carrier family 7 (cationic amino acid transporter, y+ system), member 4, mRNA (cDNA clone MGC:27672 IMAGE:4911158), complete cds.	224022	chr16	17572110	17576299	GO:0006810(transport);GO:0006865(amino acid transport)	GO:0016020(membrane)	GO:0005279(amino acid-polyamine transporter activity)	Mm.298878	TC1589106	ENSMUST00000023438
BC016133	0.0077762	1.72404	down	0.00874292	1.72332	up	392.073	227.192	391.866	389.072	451.084	336.065	217.533	261.293	202.751	434.029	333.117	408.452	BC016133	Rab7l1	MGC28972,MGC36539	Mus musculus RAB7, member RAS oncogene family-like 1, mRNA (cDNA clone MGC:28972 IMAGE:4485029), complete cds.	226422	chr1	133763868	133769464	GO:0006810(transport);GO:0007264(small GTPase mediated signal transduction);GO:0015031(protein transport)	GO:0016020(membrane)	GO:0000166(nucleotide binding);GO:0005515(protein binding);GO:0005525(GTP binding)	Mm.34027		ENSMUST00000027693
BC016197	0.000648148	1.70652	down	0.000431848	1.98497	up	314.404	158.271	270.032	336.086	284.927	322.197	170.291	148.098	156.423	256.047	263.846	290.204	BC016197	Col4a3bp	2810404O15Rik,9230101K08Rik,AU016711,CERT,GPBP	Mus musculus collagen, type IV, alpha 3 (Goodpasture antigen) binding protein, mRNA (cDNA clone MGC:27595 IMAGE:4502118), complete cds.	68018	chr13	97312726	97394704			GO:0004674(protein serine/threonine kinase activity);GO:0016301(kinase activity);GO:0016740(transferase activity)	Mm.24125///Mm.392062	TC1603848///TC1623922///TC1700109///TC1580984	ENSMUST00000077672
BC019819	0.00148974	1.88294	down	8.16969e-05	1.96035	up	2852.18	1452.55	2752.91	2874.7	3040.28	2641.55	1465.03	1451.72	1440.9	2344.47	2821.6	3092.67	BC019819	N/A	N/A	Mus musculus cDNA clone IMAGE:5123675.	N/A	chr11	5906290	5908331
BC019940	0.0235449	1.53344	down	0.00513396	1.6982	up	80.9459	47.59	73.4907	69.5363	85.6224	87.679	46.1444	43.397	53.2287	87.0259	72.6758	60.7703	BC019940	Ska1	2810433K01Rik,AV117428	Mus musculus RIKEN cDNA 2810433K01 gene, mRNA (cDNA clone MGC:28070 IMAGE:3709649), complete cds.	66468	chr18	74354952	74367295	GO:0007049(cell cycle);GO:0007067(mitosis);GO:0051301(cell division)			Mm.283406	NP746065///TC1587354	ENSMUST00000040188
BC020155	0.00722737	1.5788	down	0.00387048	1.83279	up	136.498	74.467	117.342	129.892	123.409	156.191	66.1268	72.8213	84.4528	111.053	110.202	130.771	BC020155	Ptplad2	4933428I03Rik	Mus musculus protein tyrosine phosphatase-like A domain containing 2, mRNA (cDNA clone MGC:28334 IMAGE:4016383), complete cds.	66775	chr4	88059859	88084804		GO:0016021(integral to membrane)		Mm.386788	NP424893///TC1583947	ENSMUST00000030221
BC021517	0.0381372	1.93848	down	0.0108993	2.05419	up	193.889	96.4526	186.97	208.375	188.248	185.044	69.1903	106.137	114.031	240.311	177.99	142.609	BC021517	Glis2	Gli5,Klf16,MGC36775,Nkl	Mus musculus GLIS family zinc finger 2, mRNA (cDNA clone MGC:36775 IMAGE:5352352), complete cds.	83396	chr16	4594894	4615953	GO:0006357(regulation of transcription from RNA polymerase II promoter)	GO:0005622(intracellular);GO:0005667(transcription factor complex)	GO:0003677(DNA binding);GO:0003700(transcription factor activity);GO:0008270(zinc ion binding);GO:0046872(metal ion binding)	Mm.134072	TC1575846	ENSMUST00000014447
BC021631	0.0322091	1.78782	down	0.00127881	2.23666	up	3106.23	1397.7	2540.63	3366.7	2935.98	3015.99	1383.48	1623.2	1186.43	1947.85	3318.99	2355.05	BC021631	Naga	-	Mus musculus N-acetyl galactosaminidase, alpha, mRNA (cDNA clone MGC:13811 IMAGE:4019197), complete cds.	17939	chr15	82159969	82169225	GO:0005975(carbohydrate metabolic process);GO:0008152(metabolic process)	GO:0005764(lysosome)	GO:0003824(catalytic activity);GO:0004553(hydrolase activity, hydrolyzing O-glycosyl compounds);GO:0008456(alpha-N-acetylgalactosaminidase activity);GO:0016787(hydrolase activity);GO:0016798(hydrolase activity, acting on glycosyl bonds);GO:0043169(cation binding)	Mm.20325	TC1732483	ENSMUST00000023088
BC022180	0.0235477	1.62714	down	0.0165912	1.55188	up	1168.26	746.782	1232.61	1412.25	1038.37	1054.15	709.36	711.633	819.354	1533.24	986.314	1178.26	BC022180	B4galnt1	4933429D13Rik,Gal-NAc-T,GalNAc-T,GalNAcT,Galgt1,Ggm-2,Ggm2	Mus musculus beta-1,4-N-acetyl-galactosaminyl transferase 1, mRNA (cDNA clone IMAGE:4006866), complete cds.	14421	chr10	126602280	126605579	GO:0001574(ganglioside biosynthetic process);GO:0019915(sequestering of lipid);GO:0030259(lipid glycosylation)	GO:0005615(extracellular space);GO:0016020(membrane);GO:0016021(integral to membrane);GO:0030173(integral to Golgi membrane)	GO:0003947((N-acetylneuraminyl)-galactosylglucosylceramide N-acetylgalactosaminyltransferase activity);GO:0016740(transferase activity);GO:0016757(transferase activity, transferring glycosyl groups);GO:0016758(transferase activity, transferring hexosyl groups)	Mm.386762	TC1578394///TC1593171	ENSMUST00000006914
BC023174	0.0475656	1.59001	down	0.00365125	1.5064	up	418.635	278.906	451.401	423.045	401.092	431.766	313.755	253.416	269.547	537.994	328.009	488.199	BC023174	Lzic	1810030J04Rik,AW047580	Mus musculus leucine zipper and CTNNBIP1 domain containing, mRNA (cDNA clone MGC:37142 IMAGE:4952948), complete cds.	69151	chr4	148859441	148870776	GO:0007275(multicellular organismal development);GO:0008150(biological_process)	GO:0005575(cellular_component)	GO:0003674(molecular_function);GO:0008013(beta-catenin binding)	Mm.332085	TC1577922	ENSMUST00000030842
BC023331	0.000106279	1.57468	down	0.0385513	1.58083	up	81.2238	50.3056	79.1757	102.239	61.1329	80.2994	48.747	49.2104	52.9595	80.1686	80.3694	76.9892	BC023331	N/A	N/A	Mus musculus, clone IMAGE:4500938, mRNA.	N/A	chr7	52419318	52431509
BC023801	0.0483037	1.67871	down	0.00667845	2.78614	up	126.542	46.19	75.811	105.21	152.895	121.521	38.3004	62.5286	37.7409	81.0161	64.167	82.2498	BC023801	Ints12	1110020M19Rik,2810027J24Rik,4930529N21Rik,A230056J18Rik,AI666778,Phf22	Mus musculus integrator complex subunit 12, mRNA (cDNA clone MGC:38517 IMAGE:5353058), complete cds.	71793	chr3	132754916	132773949	GO:0016180(snRNA processing)	GO:0005634(nucleus)	GO:0005515(protein binding);GO:0008270(zinc ion binding);GO:0046872(metal ion binding)	Mm.246726	TC1598086///TC1598912///TC1578854	ENSMUST00000029650
BC024633	0.0340039	1.62642	down	0.00844709	2.20063	up	236.912	109.539	174.583	254.342	204.273	252.122	143.23	89.4525	95.9341	185.498	159.34	178.909	BC024633	Arhgap12	2810011M08Rik	Mus musculus Rho GTPase activating protein 12, mRNA (cDNA clone IMAGE:4038635), complete cds.	75415	chr18	6024447	6061970	GO:0007165(signal transduction);GO:0008150(biological_process)	GO:0005575(cellular_component);GO:0005622(intracellular)	GO:0003674(molecular_function);GO:0005096(GTPase activator activity)	Mm.239675	TC1617851///TC1593078///TC1640239///TC1633179	ENSMUST00000077128
BC024942	0.00464178	1.53933	down	0.0365232	1.50221	up	198.699	130.13	201.147	183.098	162.559	250.44	123.923	135.914	130.554	213.351	216.243	173.847	BC024942	Prps2	2610101M19Rik,AA589463,AI464149,MGC28388,Prps-2	Mus musculus phosphoribosyl pyrophosphate synthetase 2, mRNA (cDNA clone MGC:28388 IMAGE:4022452), complete cds.	110639	chrX	163785025	163820618	GO:0009116(nucleoside metabolic process);GO:0009156(ribonucleoside monophosphate biosynthetic process);GO:0009165(nucleotide biosynthetic process);GO:0044249(cellular biosynthetic process)		GO:0000287(magnesium ion binding);GO:0004749(ribose phosphate diphosphokinase activity);GO:0016301(kinase activity);GO:0016740(transferase activity);GO:0016978(lipoate-protein ligase B activity);GO:0046872(metal ion binding)	Mm.272955	TC1595540	ENSMUST00000026839
BC026662	0.00114633	1.50564	down	0.00397477	1.52901	up	170.693	111.517	167.648	181.114	152.252	178.712	104.69	108.558	121.302	160.544	170.566	171.834	BC026662	Ccdc137	3110023B02Rik	Mus musculus coiled-coil domain containing 137, mRNA (cDNA clone MGC:37602 IMAGE:4989084), complete cds.	67291	chr11	120319451	120325667				Mm.264266	TC1578716	ENSMUST00000058370
BC027102	0.0324103	1.55651	down	0.0445268	1.68466	up	111.564	66.2759	101.761	122.746	126.727	85.2172	52.2155	65.2996	81.3125	96.0812	96.8639	112.338	BC027102	Cysltr1	BB147369,CysLT1R,Cyslt1	Mus musculus cysteinyl leukotriene receptor 1, mRNA (cDNA clone MGC:32281 IMAGE:5012266), complete cds.	58861	chrX	103771972	103798822	GO:0007165(signal transduction);GO:0007166(cell surface receptor linked signal transduction);GO:0007186(G-protein coupled receptor protein signaling pathway)	GO:0005887(integral to plasma membrane);GO:0016020(membrane);GO:0016021(integral to membrane)	GO:0001584(rhodopsin-like receptor activity);GO:0004871(signal transducer activity);GO:0004872(receptor activity);GO:0004930(G-protein coupled receptor activity);GO:0004974(leukotriene receptor activity);GO:0045028(purinergic nucleotide receptor activity, G-protein coupled)	Mm.287166	TC1584831///TC1594772	ENSMUST00000064892
BC029814	0.0396871	1.5419	down	0.0446843	1.63957	up	287.725	177.401	268.278	242.498	285.073	335.603	131.375	210.37	190.46	263.146	265.571	276.118	BC029814	Fos	D12Rfj1,c-fos	Mus musculus FBJ osteosarcoma oncogene, mRNA (cDNA clone MGC:36690 IMAGE:2582234), complete cds.	14281	chr12	86814850	86818219	GO:0000074(regulation of progression through cell cycle);GO:0006355(regulation of transcription, DNA-dependent);GO:0007399(nervous system development);GO:0009987(cellular process)	GO:0005634(nucleus);GO:0005667(transcription factor complex)	GO:0003677(DNA binding);GO:0003700(transcription factor activity);GO:0046983(protein dimerization activity)	Mm.246513	TC1576067	ENSMUST00000021674
BC031449	0.0318806	2.01319	down	0.0383764	1.55294	up	635.482	410.245	846.363	526.943	736.501	643.004	372.039	501.724	356.974	1167.7	753.354	618.033	BC031449	Postn	AI747096,OSF-2,Osf2,PLF,PN,Periostin,peri	Mus musculus periostin, osteoblast specific factor, mRNA (cDNA clone MGC:25368 IMAGE:4457222), complete cds.	50706	chr3	54165046	54194954	GO:0007155(cell adhesion);GO:0009888(tissue development);GO:0030198(extracellular matrix organization and biogenesis)	GO:0005578(proteinaceous extracellular matrix);GO:0005615(extracellular space)	GO:0005515(protein binding);GO:0008201(heparin binding)	Mm.236067	TC1720599	ENSMUST00000073012
BC031928	0.00434183	1.53899	down	0.00426561	1.60215	up	202.679	126.279	194.494	227.248	198.513	182.277	136.34	115.259	127.238	178.43	215.577	189.474	BC031928	Gfpt2	AI480523,GFAT2	Mus musculus glutamine fructose-6-phosphate transaminase 2, mRNA (cDNA clone MGC:18324 IMAGE:4167189), complete cds.	14584	chr11	49607688	49652115	GO:0005975(carbohydrate metabolic process);GO:0006541(glutamine metabolic process);GO:0006810(transport);GO:0008152(metabolic process);GO:0016051(carbohydrate biosynthetic process)	GO:0005737(cytoplasm)	GO:0004360(glutamine-fructose-6-phosphate transaminase (isomerizing) activity);GO:0005215(transporter activity);GO:0005529(sugar binding);GO:0008483(transaminase activity);GO:0016740(transferase activity)	Mm.24402	TC1737924	ENSMUST00000102779
BC034261	0.0139142	1.50156	down	0.00198527	1.64086	up	299.999	183.337	275.796	289.52	291.273	319.204	204.546	165.756	179.709	284.046	306.057	237.285	BC034261	Fbxw11	2310065A07Rik,AA536858,BTRC2,BTRCP2,Fbxw1b,HOS,mKIAA0696	Mus musculus F-box and WD-40 domain protein 11, mRNA (cDNA clone MGC:28671 IMAGE:4237375), complete cds.	103583	chr11	32542874	32646814	GO:0006512(ubiquitin cycle);GO:0008150(biological_process)	GO:0005575(cellular_component)	GO:0003674(molecular_function)	Mm.28017	TC1572401///TC1702303	ENSMUST00000082313
BC034531	0.0213654	1.72886	down	0.000272197	2.86689	up	263.261	92.0467	161.196	289.807	243.335	256.642	105.444	85.2838	85.4124	205.922	138.916	138.75	BC034531	Aldh1l2	D330038I09Rik,MGC19039	Mus musculus aldehyde dehydrogenase 1 family, member L2, mRNA (cDNA clone MGC:19039 IMAGE:4188055), complete cds.	216188	chr10	82950197	82996807	GO:0006412(translation);GO:0006730(one-carbon compound metabolic process);GO:0009058(biosynthetic process);GO:0009258(10-formyltetrahydrofolate catabolic process)	GO:0005737(cytoplasm)	GO:0008168(methyltransferase activity);GO:0016155(formyltetrahydrofolate dehydrogenase activity);GO:0016491(oxidoreductase activity);GO:0016742(hydroxymethyl-, formyl- and related transferase activity);GO:0048037(cofactor binding)	Mm.263138	TC1607580///TC1678051	ENSMUST00000020497
BC037058	0.00990385	1.52258	down	0.0177326	1.51877	up	423.776	278.955	423.387	386.144	394.27	490.915	252.734	321.902	262.23	458.506	427.314	384.341	BC037058	Trps1	AI115454,AI447310,D15Ertd586e,MGC107472,MGC46754	Mus musculus trichorhinophalangeal syndrome I (human), mRNA (cDNA clone MGC:46754 IMAGE:4951294), complete cds.	83925	chr15	50491994	50720592	GO:0006350(transcription);GO:0006355(regulation of transcription, DNA-dependent);GO:0045892(negative regulation of transcription, DNA-dependent)	GO:0005622(intracellular);GO:0005634(nucleus)	GO:0003676(nucleic acid binding);GO:0003677(DNA binding);GO:0003700(transcription factor activity);GO:0005515(protein binding);GO:0008270(zinc ion binding);GO:0016564(transcriptional repressor activity);GO:0046872(metal ion binding)	Mm.394308///Mm.30466	TC1677915///TC1631107	ENSMUST00000080683
BC039795	0.00928604	1.62533	down	0.00760146	1.6779	up	309.126	182.345	299.468	249.296	348.375	329.707	184.302	179.305	183.43	350.674	301.87	245.86	BC039795	Rnf160	4930528H02Rik,AV266914,C87237,KIAA0714,Listerin,Zfp294	Mus musculus zinc finger protein 294, mRNA (cDNA clone IMAGE:1329198), complete cds.	78913	chr16	87376895	87381438			GO:0005515(protein binding);GO:0008270(zinc ion binding);GO:0046872(metal ion binding)	Mm.249005	TC1667437///TC1597833	ENSMUST00000039449
BC040205	0.020686	1.98563	down	0.0175334	2.12617	up	248.979	120.426	231.798	268.892	220.549	257.497	136.459	80.898	143.919	225.095	229.008	241.29	BC040205	Zkscan17	BC040205,D130067D09,MGC36538,Nizp1,Zfp496	Mus musculus zinc finger with KRAB and SCAN domains 17, mRNA (cDNA clone MGC:36538 IMAGE:4947290), complete cds.	268417	chr11	59299063	59319414	GO:0000122(negative regulation of transcription from RNA polymerase II promoter);GO:0006355(regulation of transcription, DNA-dependent)	GO:0005622(intracellular);GO:0005634(nucleus)	GO:0003677(DNA binding);GO:0003700(transcription factor activity);GO:0005515(protein binding);GO:0008270(zinc ion binding);GO:0046872(metal ion binding)	Mm.239793	TC1574790	ENSMUST00000013262
BC040778	0.0397866	1.66898	down	0.0455205	1.72592	up	152.672	89.4403	146.649	120.923	171.11	165.981	108.856	94.5861	64.8792	163.269	127.537	149.141	BC040778	N/A	N/A	Mus musculus, clone IMAGE:4946610, mRNA.	N/A	chr17	71693833	72425158
BC043051	0.0459687	1.58908	down	0.0172386	1.91312	up	850.742	454.018	705.813	787.292	822.727	942.207	564.663	330.862	466.528	756.796	706.769	653.874	BC043051	Atad1	4921525H23Rik,AW107648	Mus musculus ATPase family, AAA domain containing 1, mRNA (cDNA clone MGC:57951 IMAGE:5708377), complete cds.	67979	chr19	32747092	32786773			GO:0000166(nucleotide binding);GO:0005524(ATP binding);GO:0017111(nucleoside-triphosphatase activity)	Mm.27123	TC1765608///TC1572297	ENSMUST00000070210
BC043471	0.0211086	1.90955	down	0.0159046	2.12083	up	155.358	74.7565	139.277	146.057	139.246	180.771	88.7913	83.4888	51.9895	152.693	132.288	132.851	BC043471	Trim33	8030451N04Rik,AI413936,DKFZp586K1123,Tif1g,mKIAA1113	Mus musculus tripartite motif protein 33, mRNA (cDNA clone IMAGE:5249453), containing frame-shift errors.	94093	chr3	103145482	103159486	GO:0006350(transcription);GO:0006355(regulation of transcription, DNA-dependent);GO:0008150(biological_process)	GO:0005622(intracellular);GO:0005634(nucleus)	GO:0003674(molecular_function);GO:0003677(DNA binding);GO:0005515(protein binding);GO:0008270(zinc ion binding);GO:0046872(metal ion binding)	Mm.195036	TC1576747	ENSMUST00000029444
BC045137	0.00498034	1.74068	down	0.0123104	1.71467	up	55.0924	32.0885	55.6031	48.1873	65.2522	51.8376	28.022	37.3599	30.8837	52.546	61.4644	52.799	BC045137	Coch	AW122937,Coch-5B2,D12H14S564E	Mus musculus coagulation factor C homolog (Limulus polyphemus), mRNA (cDNA clone MGC:54694 IMAGE:6306601), complete cds.	12810	chr12	52694359	52706760	GO:0007596(blood coagulation)	GO:0005615(extracellular space)		Mm.21325	TC1580499	ENSMUST00000085412
BC046790	0.0246942	1.82059	down	0.0113823	2.1159	up	717.275	346.416	617.476	658.101	704.103	789.62	247.167	420.108	371.972	651.553	547.504	653.37	BC046790	Arsk	2810429K17Rik,4833414G15Rik	Mus musculus arylsulfatase K, mRNA (cDNA clone MGC:61343 IMAGE:5717223), complete cds.	77041	chr13	76199563	76236082	GO:0008150(biological_process);GO:0008152(metabolic process)	GO:0005575(cellular_component)	GO:0003674(molecular_function);GO:0008484(sulfuric ester hydrolase activity)	Mm.196399	TC1577675	ENSMUST00000022083
BC048244	0.0403642	1.72086	down	0.0291913	1.70212	up	60.3812	36.4129	61.4949	62.2941	58.7142	60.1353	29.9986	48.7278	30.5122	51.9539	70.2881	62.2427	BC048244	Pkia	AI415001,PKIalpha	Mus musculus protein kinase inhibitor, alpha, mRNA (cDNA clone MGC:54726 IMAGE:6308831), complete cds.	18767	chr3	7366669	7445365	GO:0006469(negative regulation of protein kinase activity)		GO:0004860(protein kinase inhibitor activity);GO:0004862(cAMP-dependent protein kinase inhibitor activity);GO:0016301(kinase activity)	Mm.3193		ENSMUST00000028999
BC049078	0.00327223	2.1844	down	3.63783e-05	2.65371	up	221.273	83.3384	184.58	207.285	220.073	236.463	82.3329	88.1548	79.5275	227.844	150.851	175.043	BC049078	Rnf41	2210404G21Rik,4930511A05Rik,4933415P08Rik,D10Ertd722e,FLRF,Nrdp1	Mus musculus ring finger protein 41, mRNA (cDNA clone MGC:61272 IMAGE:6419123), complete cds.	67588	chr10	127848712	127878496	GO:0006512(ubiquitin cycle);GO:0008150(biological_process)	GO:0005575(cellular_component)	GO:0003674(molecular_function);GO:0005515(protein binding);GO:0008270(zinc ion binding);GO:0016874(ligase activity);GO:0046872(metal ion binding)	Mm.294120	TC1593506///TC1589940///TC1588030	ENSMUST00000055513
BC049123	0.0368224	1.95323	down	0.0258494	2.39737	up	172.527	73.7269	138.159	140.577	157.676	219.328	86.0011	46.0091	89.1705	142.853	129.495	142.13	BC049123	Stk3	0610042I06Rik,MST,Mst2,Mst3,mess1	Mus musculus serine/threonine kinase 3 (Ste20, yeast homolog), mRNA (cDNA clone MGC:61363 IMAGE:6813956), complete cds.	56274	chr15	34805253	35085435	GO:0006468(protein amino acid phosphorylation);GO:0006915(apoptosis);GO:0007165(signal transduction);GO:0007243(protein kinase cascade);GO:0043065(positive regulation of apoptosis)	GO:0005634(nucleus);GO:0005737(cytoplasm)	GO:0000166(nucleotide binding);GO:0000287(magnesium ion binding);GO:0004672(protein kinase activity);GO:0004674(protein serine/threonine kinase activity);GO:0005515(protein binding);GO:0005524(ATP binding);GO:0016301(kinase activity);GO:0016740(transferase activity);GO:0046872(metal ion binding);GO:0046983(protein dimerization activity)	Mm.262330	TC1616733///TC1586073///TC1590624	ENSMUST00000018476
BC049978	0.0296728	1.79277	down	0.0115565	2.26202	up	226.207	102.417	178.76	242.71	194.132	241.778	136.171	76.1127	94.9662	195.449	165.468	175.363	BC049978	N/A	N/A	Mus musculus potassium channel tetramerisation domain containing 9, mRNA (cDNA clone MGC:59128 IMAGE:4947787), complete cds.	N/A	chr14	68334323	68360217
BC050105	0.0197564	1.61726	down	0.0166901	1.66403	up	521.361	317.791	506.603	533.181	491.201	539.699	368.559	340.043	244.772	523.126	515.573	481.109	BC050105	Trrap	AI481500	Mus musculus transformation/transcription domain-associated protein, mRNA (cDNA clone IMAGE:30014889), complete cds.	100683	chr5	145565568	145595378	GO:0006118(electron transport);GO:0006350(transcription);GO:0006355(regulation of transcription, DNA-dependent);GO:0007093(mitotic checkpoint);GO:0016568(chromatin modification);GO:0045449(regulation of transcription)	GO:0000123(histone acetyltransferase complex);GO:0005634(nucleus);GO:0005667(transcription factor complex)	GO:0003713(transcription coactivator activity);GO:0005507(copper ion binding);GO:0009055(electron carrier activity);GO:0016773(phosphotransferase activity, alcohol group as acceptor)	Mm.273570	TC1714640///TC1576354///TC1585746	ENSMUST00000094120
BC050903	0.00261968	2.23499	down	0.0289396	1.63691	up	119.922	72.7349	162.462	111.712	148.698	99.3563	72.6021	61.981	83.6216	175.773	175.181	136.431	BC050903	Dclk1	1700113D08Rik,2810480F11Rik,AI836758,Click-I,Cpg16,Dcamkl1,Dcl,Dclk,mKIAA0369	Mus musculus doublecortin-like kinase 1, mRNA (cDNA clone IMAGE:6416546), complete cds.	13175	chr3	55046549	55272054	GO:0001764(neuron migration);GO:0006468(protein amino acid phosphorylation);GO:0007242(intracellular signaling cascade);GO:0007275(multicellular organismal development);GO:0007399(nervous system development);GO:0007409(axonogenesis);GO:0007420(brain development);GO:0030154(cell differentiation);GO:0030900(forebrain development)		GO:0000166(nucleotide binding);GO:0004672(protein kinase activity);GO:0004674(protein serine/threonine kinase activity);GO:0005524(ATP binding);GO:0016301(kinase activity);GO:0016740(transferase activity)	Mm.440377	TC1574274///TC1595323///TC1576854///TC1602153	ENSMUST00000054237
BC051022	0.00835811	1.54714	down	0.00147551	2.26025	up	216.101	94.8119	147.471	201.018	188.027	259.257	92.4563	90.0413	101.938	142.135	170.9	129.377	BC051022	Mtm1	AF073996,KIAA4176,Mtm,mKIAA4176	Mus musculus X-linked myotubular myopathy gene 1, mRNA (cDNA clone IMAGE:6398326), partial cds.	17772	chrX	68468205	68568440	GO:0016311(dephosphorylation);GO:0046716(muscle maintenance);GO:0046839(phospholipid dephosphorylation)		GO:0004437(inositol or phosphatidylinositol phosphatase activity);GO:0004721(phosphoprotein phosphatase activity);GO:0004725(protein tyrosine phosphatase activity);GO:0016787(hydrolase activity);GO:0016791(phosphoric monoester hydrolase activity)	Mm.274981	TC1620842///TC1580326///TC1637464	ENSMUST00000101502///ENSMUST00000033700///ENSMUST00000061970
BC052161	0.00315411	2.23272	down	0.0179549	1.89183	up	1166.84	617.383	1362.1	940.577	1391.22	1168.72	689.086	683.521	479.543	1312.21	1477.07	1297.02	BC052161	Col11a1	C530001D20Rik,cho	Mus musculus collagen, type XI, alpha 1, mRNA (cDNA clone MGC:59348 IMAGE:6393164), complete cds.	12814	chr3	113733508	113922237	GO:0001502(cartilage condensation);GO:0006029(proteoglycan metabolic process);GO:0006817(phosphate transport);GO:0007155(cell adhesion);GO:0030199(collagen fibril organization)	GO:0005578(proteinaceous extracellular matrix);GO:0005581(collagen);GO:0005737(cytoplasm)	GO:0005198(structural molecule activity);GO:0005201(extracellular matrix structural constituent);GO:0030020(extracellular matrix structural constituent conferring tensile strength)	Mm.209715	NP1476528///TC1579972	ENSMUST00000092155
BC053069	0.00193167	1.52021	down	0.00596237	2.07233	up	163.763	77.9871	118.245	147.97	137.144	206.175	69.6805	81.6746	82.6062	122.578	116.025	116.133	BC053069	Smarca5	4933427E24Rik,D030040M08Rik,D330027N15Rik,MommeD4,Snf2h	Mus musculus SWI/SNF related, matrix associated, actin dependent regulator of chromatin, subfamily a, member 5, mRNA (cDNA clone MGC:62411 IMAGE:6409140), complete cds.	93762	chr8	83223842	83263358	GO:0006333(chromatin assembly or disassembly);GO:0006338(chromatin remodeling);GO:0006355(regulation of transcription, DNA-dependent);GO:0009790(embryonic development);GO:0016568(chromatin modification)	GO:0005634(nucleus)	GO:0000166(nucleotide binding);GO:0003676(nucleic acid binding);GO:0003677(DNA binding);GO:0004386(helicase activity);GO:0005515(protein binding);GO:0005524(ATP binding);GO:0008026(ATP-dependent helicase activity);GO:0016563(transcriptional activator activity);GO:0016787(hydrolase activity);GO:0030528(transcription regulator activity)	Mm.246803	TC1574158	ENSMUST00000043359
BC053097	0.00683675	2.22454	down	0.00780087	1.99542	up	526.041	267.307	589.295	471.671	553.008	553.443	329.014	262.651	210.255	685.192	507.499	575.193	BC053097	Cad	2410008J01Rik,AU018859,Cpad	Mus musculus carbamoyl-phosphate synthetase 2, aspartate transcarbamylase, and dihydroorotase, mRNA (cDNA clone IMAGE:6401499), partial cds.	69719	chr5	31357183	31370132	GO:0006207('de novo' pyrimidine base biosynthetic process);GO:0006221(pyrimidine nucleotide biosynthetic process);GO:0006520(amino acid metabolic process);GO:0006526(arginine biosynthetic process);GO:0006541(glutamine metabolic process);GO:0006807(nitrogen compound metabolic process);GO:0009058(biosynthetic process)	GO:0005737(cytoplasm);GO:0009347(aspartate carbamoyltransferase complex)	GO:0004070(aspartate carbamoyltransferase activity);GO:0004086(carbamoyl-phosphate synthase activity);GO:0005524(ATP binding);GO:0016597(amino acid binding);GO:0016740(transferase activity);GO:0016787(hydrolase activity);GO:0016812(hydrolase activity, acting on carbon-nitrogen (but not peptide) bonds, in cyclic amides);GO:0016874(ligase activity)	Mm.305535	TC1600623///TC1647183///TC1605347	ENSMUST00000013773
BC053702	0.00407004	1.62819	down	0.000462046	1.566	up	6514.41	4156.32	6806.96	6176.1	6980.65	6386.48	4159.86	4312.62	3996.49	7814.92	5945.33	6660.64	BC053702	Thbs2	TSP2,Thbs-2	Mus musculus thrombospondin 2, mRNA (cDNA clone MGC:60568 IMAGE:30062369), complete cds.	21826	chr17	14804118	14831059	GO:0007155(cell adhesion)	GO:0005576(extracellular region);GO:0005615(extracellular space)	GO:0005198(structural molecule activity);GO:0005509(calcium ion binding);GO:0005515(protein binding);GO:0008201(heparin binding)	Mm.26688	TC1579291	ENSMUST00000024659
BC053706	0.0380284	1.56525	down	0.000126737	1.9065	up	4513.27	2371.15	3775.31	4441.44	4474.62	4623.75	2522.91	2405.68	2184.85	4132.03	4391.44	2802.47	BC053706	Bcat1	BCATc,Eca39	Mus musculus branched chain aminotransferase 1, cytosolic, mRNA (cDNA clone MGC:60637 IMAGE:30063465), complete cds.	12035	chr6	144947673	145024597	GO:0008152(metabolic process);GO:0008652(amino acid biosynthetic process);GO:0009081(branched chain family amino acid metabolic process);GO:0009082(branched chain family amino acid biosynthetic process);GO:0009083(branched chain family amino acid catabolic process)	GO:0005829(cytosol)	GO:0003824(catalytic activity);GO:0004084(branched-chain-amino-acid transaminase activity);GO:0008483(transaminase activity);GO:0016740(transferase activity)	Mm.4606	TC1674403///TC1574168	ENSMUST00000032402
BC054060	0.00042265	1.54771	down	0.000799359	1.8619	up	399.826	214.336	331.346	445.996	371.488	381.994	215.939	199.787	227.283	334.303	338.364	321.372	BC054060	Nat12	4930487N19Rik,5730533P17Rik,AI447922,AW322455	Mus musculus N-acetyltransferase 12, mRNA (cDNA clone IMAGE:3470278), complete cds.	70646	chr14	49797573	49810706	GO:0008152(metabolic process)		GO:0008080(N-acetyltransferase activity);GO:0016740(transferase activity)	Mm.275688	TC1580226///NP732238///TC1649704	ENSMUST00000037362
BC054075	0.0229397	1.86289	down	0.000627163	2.47168	up	84.7049	34.2144	65.2191	93.3704	73.3022	87.4422	38.2413	32.8902	31.5116	84.4923	48.0447	63.1203	BC054075	D630045J12Rik	mKIAA1549	Mus musculus cDNA clone IMAGE:5056392.	330286	chr6	38145408	38203955	GO:0006355(regulation of transcription, DNA-dependent)	GO:0005622(intracellular)	GO:0003700(transcription factor activity)	Mm.277163	TC1599219	ENSMUST00000078942
BC055012	0.0213373	1.51121	down	0.00739445	1.51224	up	1494.52	993.327	1502.08	1538.26	1410.53	1534.78	1015.27	1111.04	853.669	1678.13	1275.59	1552.53	BC055012	Slc39a6	Ermelin	Mus musculus solute carrier family 39 (metal ion transporter), member 6, mRNA (cDNA clone MGC:62673 IMAGE:6337369), complete cds.	106957	chr18	24738381	24761988	GO:0006810(transport);GO:0006811(ion transport);GO:0006829(zinc ion transport);GO:0007275(multicellular organismal development);GO:0007399(nervous system development);GO:0030001(metal ion transport)	GO:0005783(endoplasmic reticulum);GO:0016020(membrane);GO:0016021(integral to membrane)	GO:0008270(zinc ion binding);GO:0046873(metal ion transporter activity)	Mm.21688	TC1577239	ENSMUST00000070726
BC056349	0.0223063	1.78073	down	0.007662	1.90941	up	236.476	125.616	222.377	225.494	231.043	252.891	128.061	98.0344	150.754	258.27	224.725	184.135	BC056349	Kif26b	4832420M10,BC056349,D230039L06Rik,MGC156028,MGC169313	Mus musculus kinesin family member 26B, mRNA (cDNA clone MGC:73517 IMAGE:6405419), complete cds.	269152	chr1	180795105	180862983	GO:0007018(microtubule-based movement)	GO:0005874(microtubule);GO:0005875(microtubule associated complex)	GO:0000166(nucleotide binding);GO:0003774(motor activity);GO:0003777(microtubule motor activity);GO:0005524(ATP binding)	Mm.138659	TC1585740	ENSMUST00000027771
BC056356	0.0104443	1.87536	down	0.00912391	1.70654	up	274.178	160.741	303.253	236.602	275.789	310.144	137.649	162.265	182.308	366.398	294.255	249.106	BC056356	LOC381508	-	Mus musculus cDNA clone IMAGE:6813048.	381508	chr19	9903388	9911387				Mm.273536	TC1577869
BC056966	0.0238793	1.52369	down	0.0246185	1.60245	up	212.425	133.527	201.186	188.91	241.607	206.758	140.34	154.409	105.833	198.638	214.65	190.271	BC056966	Gtf2e1	2610024P03Rik,56kDa,AI303800,FE,TFIIE-A	Mus musculus general transcription factor II E, polypeptide 1 (alpha subunit), mRNA (cDNA clone MGC:66764 IMAGE:6817212), complete cds.	74197	chr16	37509880	37539875	GO:0006118(electron transport);GO:0006350(transcription);GO:0006355(regulation of transcription, DNA-dependent);GO:0006367(transcription initiation from RNA polymerase II promoter)	GO:0005634(nucleus);GO:0005673(transcription factor TFIIE complex)	GO:0003702(RNA polymerase II transcription factor activity);GO:0008270(zinc ion binding);GO:0009055(electron carrier activity);GO:0020037(heme binding);GO:0046872(metal ion binding)	Mm.287795	TC1575437///TC1609373	ENSMUST00000023525
BC056988	0.0119962	1.58541	down	0.00465971	1.72394	up	79.6837	46.0041	73.4194	67.3757	89.2337	82.4416	44.8222	50.1664	43.0238	60.2825	81.7058	78.27	BC056988	L1cam	CD171,L1,L1-NCAM,NCAM-L1	Mus musculus L1 cell adhesion molecule, mRNA (cDNA clone MGC:66909 IMAGE:6822217), complete cds.	16728	chrX	71099306	71126098	GO:0007155(cell adhesion);GO:0007275(multicellular organismal development);GO:0007399(nervous system development);GO:0007411(axon guidance);GO:0030154(cell differentiation)	GO:0005886(plasma membrane);GO:0009986(cell surface);GO:0016020(membrane);GO:0016021(integral to membrane);GO:0042734(presynaptic membrane);GO:0043195(terminal button)	GO:0005515(protein binding)	Mm.260568	TC1577304	ENSMUST00000102871
BC058101	0.0228816	1.67617	down	0.0496927	1.68144	up	141.748	83.0575	139.483	100.434	165.18	159.63	73.3934	99.4807	76.2983	162.414	112.665	143.368	BC058101	2810408P10Rik	MGC67181	Mus musculus RIKEN cDNA 2810408P10 gene, mRNA (cDNA clone MGC:67181 IMAGE:6822264), complete cds.	242747	chr4	147197094	147222475				Mm.332053	TC1602628	ENSMUST00000091484
BC058809	0.0129342	1.73371	down	0.00912517	2.17895	up	142.93	64.7996	112.499	179.493	110.486	138.812	54.9295	74.0448	65.4246	125.642	119.5	92.3558	BC058809	1810074P20Rik	AI429228,mKIAA0776	Mus musculus RIKEN cDNA 1810074P20 gene, mRNA (cDNA clone IMAGE:6491288), partial cds.	67490	chr4	25175746	25208912	GO:0008152(metabolic process)		GO:0003824(catalytic activity)	Mm.440575	TC1576949	ENSMUST00000102994
BC059209	0.00745022	1.61276	down	0.00382584	1.77156	up	177.533	100.786	161.63	192.294	168.902	171.403	87.4838	117.311	97.5629	149.286	172.588	163.016	BC059209	Vcpip1	4932442A08,5730421J18Rik,5730538E15Rik,VCIP135,mKIAA1850	Mus musculus valosin containing protein (p97)/p47 complex interacting protein 1, mRNA (cDNA clone MGC:66512 IMAGE:6406239), complete cds.	70675	chr1	9713277	9738463	GO:0006512(ubiquitin cycle)	GO:0005737(cytoplasm);GO:0005783(endoplasmic reticulum)	GO:0004843(ubiquitin-specific protease activity);GO:0008233(peptidase activity);GO:0008234(cysteine-type peptidase activity);GO:0016787(hydrolase activity)	Mm.440951///Mm.274493	TC1576527///TC1619196	ENSMUST00000057438
BC060304	0.0244993	1.65689	down	0.0165189	1.55842	up	90.4412	58.4065	96.9464	97.0869	93.0242	81.2125	64.4498	63.1751	47.5946	94.9403	115.546	80.3525	BC060304	Hist1h2bg	-	Mus musculus histone cluster 1, H2bg, mRNA (cDNA clone MGC:70229 IMAGE:4217587), complete cds.	319181	chr13	23663264	23663883
BC060661	0.0208848	1.57014	down	0.0152022	1.62188	up	111.221	69.0564	107.754	120.854	114.349	98.4605	62.3149	61.1318	83.7225	117.249	94.0107	112.002	BC060661	Dnase2a	Dnase2	Mus musculus deoxyribonuclease II alpha, mRNA (cDNA clone MGC:79231 IMAGE:30356047), complete cds.	13423	chr8	87432619	87438411	GO:0006259(DNA metabolic process);GO:0006308(DNA catabolic process);GO:0006915(apoptosis);GO:0007275(multicellular organismal development);GO:0030218(erythrocyte differentiation)	GO:0005615(extracellular space);GO:0005764(lysosome)	GO:0004518(nuclease activity);GO:0004519(endonuclease activity);GO:0004531(deoxyribonuclease II activity);GO:0016787(hydrolase activity)	Mm.437155	TC1645948
BC060663	0.00122826	1.95232	down	0.000374973	2.2647	up	187.933	82.9235	162.218	207.389	185.122	171.287	78.7125	78.927	91.1311	181.294	161.214	144.145	BC060663	Anks6	2210417J20Rik,Ankrd14,Gm635,Samd6	Mus musculus ankyrin repeat and sterile alpha motif domain containing 6, mRNA (cDNA clone IMAGE:30356260).	75691	chr4	47028560	47070178				Mm.86866	TC1592702
BC061052	0.046211	1.64578	down	0.0322187	1.52963	up	816.895	530.426	889.444	678.596	988.138	783.953	551.096	583.143	457.038	938.835	1089.24	640.256	BC061052	Fstl3	E030038F23Rik,Flrg	Mus musculus follistatin-like 3, mRNA (cDNA clone MGC:74163 IMAGE:30312598), complete cds.	83554	chr10	79240018	79245139	GO:0030514(negative regulation of BMP signaling pathway)	GO:0005615(extracellular space)	GO:0017106(activin inhibitor activity);GO:0048185(activin binding)	Mm.251710	TC1760844	ENSMUST00000020575
BC062904	0.0381534	1.55418	down	0.0176108	1.92899	up	117.217	59.5096	93.9309	83.4221	129.783	138.447	53.0702	62.8176	62.6411	120.338	82.2283	79.2262	BC062904	Ubxn7	A630090P18,AI196514,KIAA0794,Ubxd7,mKIAA0794	Mus musculus UBX domain containing 7, mRNA (cDNA clone IMAGE:6812948), partial cds.	224111	chr16	32332342	32386842				Mm.270108	TC1573763///TC1597435	ENSMUST00000066414
BC062927	0.00636177	1.77572	down	0.00905989	2.03562	up	375.823	183.343	324.559	292.524	439.558	395.385	193.344	203.502	153.183	331.234	285.151	357.29	BC062927	Enah	AI464316,AW045240,Mena,Ndpp1,WBP8	Mus musculus enabled homolog (Drosophila), mRNA (cDNA clone MGC:73459 IMAGE:6851217), complete cds.	13800	chr1	183833697	183949730	GO:0001843(neural tube closure);GO:0006928(cell motility);GO:0007015(actin filament organization);GO:0007275(multicellular organismal development);GO:0007399(nervous system development);GO:0007411(axon guidance);GO:0008154(actin polymerization and/or depolymerization);GO:0030036(actin cytoskeleton organization and biogenesis);GO:0030154(cell differentiation);GO:0046907(intracellular transport)	GO:0001725(stress fiber);GO:0005856(cytoskeleton);GO:0005925(focal adhesion);GO:0015629(actin cytoskeleton);GO:0030027(lamellipodium);GO:0030175(filopodium)	GO:0003779(actin binding);GO:0005515(protein binding);GO:0005522(profilin binding);GO:0017124(SH3 domain binding)	Mm.87759///Mm.389224	NP380135///TC1577221///TC1614157
BC066002	0.000449222	1.51125	down	0.000858119	1.74451	up	73.3452	41.9859	63.3884	67.7321	71.7515	80.5521	42.5891	44.1811	39.1875	65.2727	61.7466	63.1459	BC066002	BC024479	2810450G17Rik,9530092B10Rik,MGC37388	Mus musculus cDNA sequence BC024479, mRNA (cDNA clone MGC:90123 IMAGE:5701381), complete cds.	235184	chr9	37296905	37331735				Mm.127892	TC1579889	ENSMUST00000048604
BC066788	0.014454	1.71834	down	0.0291667	1.93346	up	115.324	57.7577	100.289	81.2922	156.167	108.512	52.7972	64.5556	55.9202	87.7224	88.3049	124.839	BC066788	Arhgap28	AU044757,AW550892,E130310N06	Mus musculus Rho GTPase activating protein 28, mRNA (cDNA clone MGC:76428 IMAGE:30049271), complete cds.	268970	chr17	68192053	68353438	GO:0007165(signal transduction)	GO:0005622(intracellular)	GO:0005096(GTPase activator activity)	Mm.9935	TC1585187	ENSMUST00000024840
BC067042	0.00170018	1.7158	down	0.0309591	1.92512	up	95.4733	48.1346	82.2487	96.4982	65.196	124.726	48.6488	53.4921	42.2628	82.1451	79.0777	85.5233	BC067042	Ythdf3	9130022A11Rik	Mus musculus YTH domain family 3, mRNA (cDNA clone MGC:90053 IMAGE:6856248), complete cds.	229096	chr3	16083249	16116854				Mm.23834	TC1575901
BC069183	0.00561384	1.52828	down	0.012545	1.60944	up	882.312	546.088	832.827	744.956	884.944	1017.04	617.859	507.4	513.004	798.85	909.449	790.182	BC069183	Sp100	A430075G10Rik	Mus musculus nuclear antigen Sp100, mRNA (cDNA clone MGC:70218 IMAGE:4911025), complete cds.	20684	chr1	87546601	87598147		GO:0005634(nucleus);GO:0005694(chromosome)	GO:0003677(DNA binding)	Mm.290906	TC1712709///TC1619557///TC1712402	ENSMUST00000073378///ENSMUST00000097667
BC070455	0.0480479	1.68501	down	0.0349544	1.89927	up	104.653	55.7151	92.1848	82.5982	127.372	103.99	51.717	42.1195	73.3088	86.4426	80.9996	109.112	BC070455	Shcbp1	mPAL	Mus musculus Shc SH2-domain binding protein 1, mRNA (cDNA clone MGC:96393 IMAGE:30606785), complete cds.	20419	chr8	4735975	4779554			GO:0005515(protein binding);GO:0042169(SH2 domain binding)	Mm.37801	TC1620942///TC1576543	ENSMUST00000022945
BC079652	0.00300366	1.71485	down	0.00460321	1.91929	up	467.477	242.769	415.19	451.729	402.747	547.956	271.84	243.065	213.402	454.128	391.905	399.538	BC079652	Ccar1	2610511G16Rik,9430036H15Rik,Carp1,MGC90759	Mus musculus cell division cycle and apoptosis regulator 1, mRNA (cDNA clone MGC:90759 IMAGE:6844310), complete cds.	67500	chr10	62206675	62254979	GO:0006915(apoptosis);GO:0007049(cell cycle);GO:0043065(positive regulation of apoptosis)	GO:0005641(nuclear envelope lumen)	GO:0003674(molecular_function);GO:0003676(nucleic acid binding)	Mm.196371	TC1682627///TC1617725///TC1761241	ENSMUST00000020268
BC080200	0.0135796	1.91	down	0.00456763	2.85189	up	255.396	90.3468	169.373	246.04	211.426	308.722	89.3226	113.311	68.4066	156.19	184.713	167.217	BC080200	Ifih1	9130009C22Rik,Helicard,Hlcd,MDA5,MGC90959	Mus musculus interferon induced with helicase C domain 1, mRNA (cDNA clone MGC:90959 IMAGE:3597815), complete cds.	71586	chr2	62435504	62484210	GO:0006955(immune response);GO:0009615(response to virus);GO:0042981(regulation of apoptosis);GO:0045087(innate immune response)	GO:0005622(intracellular);GO:0005634(nucleus)	GO:0000166(nucleotide binding);GO:0003676(nucleic acid binding);GO:0003723(RNA binding);GO:0004386(helicase activity);GO:0005515(protein binding);GO:0005524(ATP binding);GO:0008026(ATP-dependent helicase activity);GO:0016787(hydrolase activity)	Mm.136224	TC1579199	ENSMUST00000028259
BC080865	0.00748563	1.70317	down	0.0342541	1.76834	up	287.039	158.796	270.742	209.577	280.008	371.531	166.893	136.82	172.674	313.688	243.386	255.151	BC080865	Setbp1	C130092E12,MGC90748,Seb,mKIAA0437	Mus musculus SET binding protein 1, mRNA (cDNA clone MGC:90748 IMAGE:30531988), complete cds.	240427	chr18	78950749	79283678	GO:0006355(regulation of transcription, DNA-dependent)	GO:0005634(nucleus)	GO:0003677(DNA binding);GO:0005515(protein binding)	Mm.312871	NP859928	ENSMUST00000025430
BC082279	0.0281331	1.88378	down	0.0247185	1.99481	up	167.253	84.4765	157.33	156.766	136.704	208.287	63.2125	107.346	82.8713	160.732	126.764	184.495	BC082279	Actr3b	9630005C02,ARP11,AW047569,Arp3b,Arp3beta,MGC91290	Mus musculus ARP3 actin-related protein 3 homolog B (yeast), mRNA (cDNA clone MGC:91290 IMAGE:6332588), complete cds.	242894	chr5	25265843	25356159	GO:0008150(biological_process)	GO:0005575(cellular_component)	GO:0003674(molecular_function);GO:0005515(protein binding)	Mm.150319	TC1585513	ENSMUST00000088244///ENSMUST00000070431
BC082583	0.0454243	1.59528	down	0.0222224	1.84884	up	143.996	79.6565	123.961	133.581	160.735	137.672	60.4748	74.0592	104.435	125.383	116.509	129.992	BC082583	Rdh13	8430425D21Rik	Mus musculus retinol dehydrogenase 13 (all-trans and 9-cis), mRNA (cDNA clone MGC:105205 IMAGE:30613493), complete cds.	108841	chr7	4377268	4397211	GO:0008152(metabolic process)		GO:0016491(oxidoreductase activity)	Mm.436555	TC1578066///TC1604948	ENSMUST00000008579
BC085106	0.0190525	1.64511	down	0.00500455	1.78634	up	278.65	157.714	258.25	282.143	276.988	276.82	143.065	138.395	191.68	259.817	292.876	222.057	BC085106	Cep170	4933426L22Rik,A330004A13Rik,AI195353	Mus musculus centrosomal protein 170, mRNA (cDNA clone IMAGE:30143933).	545389	chr1	178663792	178687114		GO:0005856(cytoskeleton);GO:0005874(microtubule)		Mm.269991	TC1600625///TC1590623///TC1601435///TC1587501	ENSMUST00000070119///ENSMUST00000057037
BC086642	0.0218967	1.91	down	0.00841328	1.94038	up	527.8	273.157	526.605	442.57	576.348	564.482	218.44	309.735	291.295	480.702	421.751	677.364	BC086642	Golim4	3110027H23Rik,GIMPC,GPP130,Golph4,MGC102202,P138	Mus musculus golgi integral membrane protein 4, mRNA (cDNA clone MGC:113742 IMAGE:6836803), complete cds.	73124	chr3	75680406	75760703	GO:0006810(transport)	GO:0005794(Golgi apparatus);GO:0016020(membrane);GO:0016021(integral to membrane)		Mm.249232	TC1699829///TC1603164///TC1623786///TC1576692	ENSMUST00000038563
BC086656	0.0173631	1.52935	down	0.0103223	1.64064	up	531.689	326.972	495.625	566.162	528.007	500.899	366.606	350.218	264.093	518.378	507.084	461.412	BC086656	Heatr5a	C230081H03Rik,D930036F22Rik,mKIAA1316	Mus musculus HEAT repeat containing 5A, mRNA (cDNA clone MGC:99412 IMAGE:30544145), complete cds.	320487	chr12	52977749	53062575			GO:0016853(isomerase activity)	Mm.131941	TC1581843///TC1617349///TC1592324///TC1643453	ENSMUST00000040583
BC087542	0.0259804	1.54449	down	0.010764	2.00526	up	110.825	55.2119	84.6618	104.05	135.369	93.0552	66.4626	53.2024	45.9707	83.0023	95.1609	75.8221	BC087542	Lrrc1	A430093J20Rik,AU016091,D030059I21,KIAA4018,MGC90936,mKIAA4018	Mus musculus leucine rich repeat containing 1, mRNA (cDNA clone MGC:90936 IMAGE:4934980), complete cds.	214345	chr9	77278629	77392506		GO:0016020(membrane)	GO:0005515(protein binding)	Mm.28534	TC1777801///TC1580632///TC1591656	ENSMUST00000049755
BC089014	0.00405436	1.75869	down	0.0403848	1.87302	up	91.4031	47.0503	82.6932	130.148	69.7438	74.3176	53.0907	41.8035	46.2568	88.7562	72.2987	87.0247	BC089014	Sgol1	3300001M08Rik,C81037,MGC113769,Sgo1	Mus musculus shugoshin-like 1 (S. pombe), mRNA (cDNA clone MGC:113769 IMAGE:30604765), complete cds.	72415	chr17	53815385	53827397	GO:0007049(cell cycle);GO:0007059(chromosome segregation);GO:0007067(mitosis);GO:0045132(meiotic chromosome segregation);GO:0051301(cell division)	GO:0000775(chromosome, pericentric region);GO:0005634(nucleus)		Mm.153202	TC1578833	ENSMUST00000024736
BC089354	0.0027038	1.66852	down	0.00722102	1.62328	up	550.078	339.64	563.608	491.182	556.508	602.544	392.165	317.749	309.005	573.054	574.317	543.454	BC089354	Golim4	3110027H23Rik,GIMPC,GPP130,Golph4,MGC102202,P138	Mus musculus golgi integral membrane protein 4, mRNA (cDNA clone MGC:102202 IMAGE:6837211), complete cds.	73124	chr3	75680305	75760753	GO:0006810(transport)	GO:0005794(Golgi apparatus);GO:0016020(membrane);GO:0016021(integral to membrane)		Mm.249232	TC1699829///TC1603164///TC1623786///TC1576692	ENSMUST00000038563
BC090968	0.0459507	1.59595	down	0.00222517	2.22226	up	145.546	65.9933	105.987	159.568	134.114	142.957	53.268	73.8043	70.9075	132.522	99.5103	85.9291	BC090968	Strn	AU022939,D130055P19	Mus musculus striatin, calmodulin binding protein, mRNA (cDNA clone MGC:106672 IMAGE:30646517), complete cds.	268980	chr17	79053303	79135900			GO:0005516(calmodulin binding)	Mm.362493///Mm.311915///Mm.391038	TC1706771///TC1581218	ENSMUST00000024881
BC096471	0.0237722	1.99451	down	0.00564908	2.44531	up	292.802	121.438	241.485	286.662	255.395	336.349	122.922	150.142	91.2505	307.425	212.207	204.823	BC096471	Flrt2	KIAA0405	Mus musculus fibronectin leucine rich transmembrane protein 2, mRNA (cDNA clone MGC:106049 IMAGE:3582155), complete cds.	399558	chr12	96930467	97019313		GO:0016021(integral to membrane)	GO:0005515(protein binding)	Mm.341948	TC1598573///TC1582620	ENSMUST00000057324
BC096547	0.0375579	1.56047	down	0.0498484	1.52948	up	57.9119	38.358	58.945	51.932	65.9991	55.8045	47.1621	38.3737	29.5383	61.0445	62.8198	52.9706	BC096547	Ccdc67	4933401K09Rik	Mus musculus coiled-coil domain containing 67, mRNA (cDNA clone MGC:106501 IMAGE:30360184), complete cds.	234964	chr9	15364307	15431175				Mm.32237	TC1699345	ENSMUST00000056841
BC099519	0.000206254	1.68159	down	0.000473472	1.57398	up	85.6002	54.43	91.4277	85.8414	88.8525	82.1066	50.8852	54.5957	57.8092	93.0601	92.679	88.5439	BC099519	Enkur	4933434I06Rik,AU016229,MGC117794	Mus musculus RIKEN cDNA 4933434I06 gene, mRNA (cDNA clone MGC:117794 IMAGE:30848009), complete cds.	71233	chr2	21102357	21126891			GO:0005516(calmodulin binding)	Mm.27658	TC1585153	ENSMUST00000027992
BC099669	0.0214392	1.55332	down	0.0088888	2.23623	up	157.592	69.6536	107.854	143.48	126.683	202.615	57.5298	78.6077	72.8233	114.439	92.4046	116.719	BC099669	Mars2	C730026E21Rik,MetRS	Mus musculus methionine-tRNA synthetase 2 (mitochondrial), mRNA (cDNA clone MGC:106216 IMAGE:3153138), complete cds.	212679	chr1	55294046	55295969	GO:0006412(translation);GO:0006418(tRNA aminoacylation for protein translation);GO:0006431(methionyl-tRNA aminoacylation)	GO:0005739(mitochondrion);GO:0005759(mitochondrial matrix)	GO:0000166(nucleotide binding);GO:0004812(aminoacyl-tRNA ligase activity);GO:0004825(methionine-tRNA ligase activity);GO:0005524(ATP binding);GO:0016874(ligase activity)	Mm.19223	TC1581586	ENSMUST00000061334
BC107265	0.00633416	1.61023	down	0.0113263	1.98241	up	61.4869	30.466	49.1409	54.0622	50.4892	79.9093	27.913	29.6029	33.8821	55.927	47.4357	44.06	BC107265	2300002M23Rik	MGC130211,MGC130212,Stg,emprin	Mus musculus RIKEN cDNA 2300002M23 gene, mRNA (cDNA clone MGC:130211 IMAGE:40052572), complete cds.	69542	chr17	35704429	35705874		GO:0005615(extracellular space)		Mm.265291	TC1728422	ENSMUST00000044326
BC111899	0.00562856	1.52342	down	0.0119923	1.87093	up	71.7135	37.97	57.5752	55.8787	74.2916	84.9702	36.0629	43.5595	34.2876	60.6542	55.457	56.6143	BC111899	Lmln	5330415H22Rik,AI465495	Mus musculus leishmanolysin-like (metallopeptidase M8 family), mRNA (cDNA clone MGC:132967 IMAGE:40062192), complete cds.	239833	chr16	33062606	33123827	GO:0006508(proteolysis);GO:0007155(cell adhesion)	GO:0016020(membrane)	GO:0004222(metalloendopeptidase activity);GO:0008237(metallopeptidase activity);GO:0008270(zinc ion binding)	Mm.131951	TC1584943	ENSMUST00000023497
BC112911	0.0359181	2.1354	down	0.00177852	2.58992	up	892.802	347.469	770.549	923.907	969.682	784.819	378.103	274.866	389.437	570.415	611.629	1129.6	BC112911	Il4ra	CD124,Il4r,MGC118473	Mus musculus interleukin 4 receptor, alpha, mRNA (cDNA clone MGC:118473 IMAGE:30138743), complete cds.	16190	chr7	132695795	132722988	GO:0006955(immune response);GO:0007166(cell surface receptor linked signal transduction)	GO:0005615(extracellular space);GO:0005887(integral to plasma membrane);GO:0016020(membrane);GO:0016021(integral to membrane)	GO:0004872(receptor activity);GO:0004896(hematopoietin/interferon-class (D200-domain) cytokine receptor activity);GO:0004907(interleukin receptor activity);GO:0005515(protein binding)	Mm.233802	TC1572408	ENSMUST00000033004
BC113128	0.000746674	1.77993	down	0.00136456	2.32955	up	92.4459	39.4117	70.0896	83.9753	82.6635	110.699	39.1062	36.2477	42.8812	68.5531	66.2989	75.4167	BC113128	D330045A20Rik	AI132325	Mus musculus RIKEN cDNA D330045A20 gene, mRNA (cDNA clone MGC:132912 IMAGE:40061080), complete cds.	102871	chrX	136015005	136088556				Mm.26565	TC1585617	ENSMUST00000046763
BC115698	0.0196556	1.5563	down	0.0160533	1.57896	up	364.2	229.332	359.406	377.9	415.526	299.174	257.095	214.669	216.232	307.092	432.202	338.926	BC115698	Gpr155	1110017O10Rik,AW319992,DEPDC3,F730029F15Rik,PGR22	Mus musculus G protein-coupled receptor 155, mRNA (cDNA clone MGC:132852 IMAGE:40060105), complete cds.	68526	chr2	73189064	73224433			GO:0004872(receptor activity)	Mm.241098	TC1686853///TC1621593///TC1629376	ENSMUST00000048504
BC117814	0.00638653	1.7111	down	0.0331634	1.67286	up	165.19	97.6838	166.429	166.761	126.586	202.223	102.633	108.624	81.794	168.682	149.742	180.863	BC117814	Socs4	3110032M18Rik,A730004F22Rik,AI427843,AU015727,AU015859,MGC143730,MGC143731,Socs7	Mus musculus suppressor of cytokine signaling 4, mRNA (cDNA clone MGC:143730 IMAGE:40092681), complete cds.	67296	chr14	47909191	47911242	GO:0001558(regulation of cell growth);GO:0007242(intracellular signaling cascade);GO:0009968(negative regulation of signal transduction)			Mm.23957///Mm.425886	TC1587741///TC1607655	ENSMUST00000065562
BC117846	0.020057	1.62758	down	0.0143735	1.96184	up	103.416	52.3454	85.0217	125.575	104.557	80.1147	48.3694	45.8469	62.8198	77.6001	77.183	100.282	BC117846	D330038O06Rik	-	Mus musculus RIKEN cDNA D330038O06 gene, mRNA (cDNA clone MGC:143822 IMAGE:40093653), complete cds.	330788	chr8	72288696	72298765	GO:0006355(regulation of transcription, DNA-dependent)	GO:0005622(intracellular);GO:0005634(nucleus)	GO:0003676(nucleic acid binding);GO:0008270(zinc ion binding);GO:0046872(metal ion binding)	Mm.41364	TC1611109///TC1647057///TC1584140	ENSMUST00000098687
BC117894	0.0368721	1.8806	down	0.00619506	2.71504	up	112.342	42.4648	78.2723	126.885	99.3987	110.741	56.3504	30.6882	40.3558	80.9692	90.5159	63.3318	BC117894	Cdkl2	5330436L21Rik,AI505225,KKIAMRE,Kkm,MGC144031,MGC144032	Mus musculus cyclin-dependent kinase-like 2 (CDC2-related kinase), mRNA (cDNA clone MGC:144031 IMAGE:40096852), complete cds.	53886	chr5	92435759	92471977	GO:0006468(protein amino acid phosphorylation)	GO:0005634(nucleus)	GO:0000166(nucleotide binding);GO:0004672(protein kinase activity);GO:0004674(protein serine/threonine kinase activity);GO:0005524(ATP binding);GO:0016301(kinase activity);GO:0016740(transferase activity)	Mm.44963	TC1610784///TC1590497	ENSMUST00000086978///ENSMUST00000069937
BC117921	0.015965	1.75587	down	0.019206	1.77585	up	527.078	296.236	519.413	646.891	454.156	480.188	335.239	314.702	238.767	621.125	469.549	467.565	BC117921	Zranb3	4933425L19Rik,AI316834,C730006D09	Mus musculus zinc finger, RAN-binding domain containing 3, mRNA (cDNA clone MGC:144079 IMAGE:40097463), complete cds.	226409	chr1	129850762	129999624		GO:0005622(intracellular)	GO:0000166(nucleotide binding);GO:0003676(nucleic acid binding);GO:0003677(DNA binding);GO:0004386(helicase activity);GO:0004519(endonuclease activity);GO:0005524(ATP binding);GO:0008026(ATP-dependent helicase activity);GO:0008270(zinc ion binding);GO:0016787(hydrolase activity);GO:0046872(metal ion binding)	Mm.440937	TC1591376///TC1581883	ENSMUST00000086614///ENSMUST00000097598
BC118538	0.0425426	1.73878	down	0.021278	1.89155	up	230.027	125.167	212.602	223.871	228.777	237.432	89.0052	161.49	125.007	186.289	209.535	241.981	BC118538	Oas2	Oasl11	Mus musculus 2'-5' oligoadenylate synthetase 2, mRNA (cDNA clone MGC:143854 IMAGE:40094064), complete cds.	246728	chr5	121180342	121199797	GO:0006401(RNA catabolic process);GO:0006955(immune response)		GO:0001730(2'-5'-oligoadenylate synthetase activity);GO:0003676(nucleic acid binding);GO:0003723(RNA binding);GO:0005524(ATP binding);GO:0016740(transferase activity)	Mm.260926	NP492150	ENSMUST00000081491///ENSMUST00000053909
BC119173	0.0442381	1.52724	down	0.0423672	1.73217	up	89.535	50.7791	77.9851	63.6129	94.5931	110.399	49.1532	59.4225	43.7617	64.2473	74.2136	95.4945	BC119173	Hist1h1d	H1.3,H1D,H1f3,H1s-4	Mus musculus histone cluster 1, H1d, mRNA (cDNA clone MGC:155489 IMAGE:8733922), complete cds.	14957	chr13	23646903	23647920	GO:0006334(nucleosome assembly);GO:0016584(nucleosome spacing)	GO:0000786(nucleosome);GO:0005634(nucleus);GO:0005694(chromosome)	GO:0003677(DNA binding);GO:0005515(protein binding)	Mm.247046	TC1587801	ENSMUST00000045301
BC119594	0.00881412	2.14204	down	0.029437	1.96243	up	77.5131	39.2626	83.3793	55.5525	91.2538	85.733	31.2067	48.8851	37.696	95.8068	69.7418	84.5894	BC119594	Serac1	4930511N22Rik,D17Ertd141e	Mus musculus serine active site containing 1, mRNA (cDNA clone MGC:141377 IMAGE:40059066), complete cds.	321007	chr17	6044065	6079727		GO:0016020(membrane);GO:0016021(integral to membrane)	GO:0005488(binding)	Mm.5548	TC1587824	ENSMUST00000024570
BC120791	0.0251726	2.70047	down	0.0345637	2.13391	up	154.376	76.5732	199.748	157.997	159.675	145.455	68.659	49.1493	111.911	211.023	243.46	144.76	BC120791	Kif26b	4832420M10,BC056349,D230039L06Rik,MGC156028,MGC169313	Mus musculus RIKEN cDNA D230039L06 gene, mRNA (cDNA clone MGC:156028 IMAGE:40129714), complete cds.	269152	chr1	180459592	180646353	GO:0007018(microtubule-based movement)	GO:0005874(microtubule);GO:0005875(microtubule associated complex)	GO:0000166(nucleotide binding);GO:0003774(motor activity);GO:0003777(microtubule motor activity);GO:0005524(ATP binding)	Mm.138659	TC1585740	ENSMUST00000027771
BC129853	0.0071072	1.64338	down	0.000243427	1.91671	up	362.028	188.652	312.565	372.331	330.929	382.826	179.129	189.91	196.917	368.656	301.964	267.077	BC129853	Rabep1	AA409789,AI481320,AV213537,AW240603,MGC150053,MGC150054,Rab5ep,rabaptin-5	Mus musculus rabaptin, RAB GTPase binding effector protein 1, mRNA (cDNA clone MGC:150053 IMAGE:40109688), complete cds.	54189	chr11	70658443	70754148	GO:0006810(transport);GO:0006897(endocytosis);GO:0006915(apoptosis);GO:0015031(protein transport)	GO:0005768(endosome)	GO:0005096(GTPase activator activity);GO:0008083(growth factor activity)	Mm.7087	TC1579985///TC1597708	ENSMUST00000076270
BC129875	0.0192375	2.19404	down	0.0357389	1.56517	up	94.9429	61.356	136.149	100.223	101.689	82.9164	69.7713	67.4995	46.7972	102.451	126.764	179.232	BC129875	Igfals	ALS,Albs,KIAA4111,MGC150140,MGC150141,mKIAA4111	Mus musculus insulin-like growth factor binding protein, acid labile subunit, mRNA (cDNA clone MGC:150140 IMAGE:40110389), complete cds.	16005	chr17	25015726	25018912	GO:0007155(cell adhesion)	GO:0005615(extracellular space)	GO:0005515(protein binding);GO:0005520(insulin-like growth factor binding)	Mm.3135	TC1581451	ENSMUST00000050714
BC130019	0.01727	2.27505	down	0.0034435	2.47185	up	95.7818	38.0945	89.8391	82.2804	123.546	81.5189	41.2631	38.3251	34.6954	109.827	102.038	57.6524	BC130019	Sgcd	35kDa,delta-SG	Mus musculus sarcoglycan, delta (dystrophin-associated glycoprotein), mRNA (cDNA clone MGC:161177 IMAGE:40140624), complete cds.	24052	chr11	46792322	47192794	GO:0007010(cytoskeleton organization and biogenesis);GO:0016044(membrane organization and biogenesis)	GO:0005856(cytoskeleton);GO:0005887(integral to plasma membrane);GO:0016012(sarcoglycan complex);GO:0016020(membrane);GO:0016021(integral to membrane)	GO:0005515(protein binding)	Mm.338890	TC1588875///TC1594507	ENSMUST00000077221
BC131907	0.00416994	2.64439	down	0.0463602	1.91696	up	100.165	51.4576	135.115	67.0423	120.686	112.767	60.0323	38.9557	55.3848	129.359	160.951	115.037	BC131907	Cthrc1	1110014B07Rik	Mus musculus collagen triple helix repeat containing 1, mRNA (cDNA clone MGC:163538 IMAGE:40130184), complete cds.	68588	chr15	38908501	38918334	GO:0006817(phosphate transport);GO:0008150(biological_process)	GO:0005575(cellular_component);GO:0005578(proteinaceous extracellular matrix);GO:0005737(cytoplasm)	GO:0003674(molecular_function);GO:0005198(structural molecule activity)	Mm.41556	TC1634588///TC1584151	ENSMUST00000067072
BC131992	0.0245563	2.00418	down	0.0364782	1.79536	up	170.381	92.4006	190.827	156.506	125.477	229.159	102.258	80.6377	94.3057	259.695	137.609	175.177	BC131992	Ddit4	5830413E08Rik,AA415483,REDD1,Rtp801,dig2	Mus musculus DNA-damage-inducible transcript 4, mRNA (cDNA clone MGC:163623 IMAGE:40130269), complete cds.	74747	chr10	59412845	59414517	GO:0008150(biological_process)	GO:0005575(cellular_component)	GO:0003674(molecular_function)	Mm.21697	TC1574868	ENSMUST00000020308
BC132645	0.00723178	1.88719	down	0.00352749	1.88072	up	276.519	147.74	278.882	298.927	248.939	281.692	142.579	128.059	172.584	298.927	306.741	230.977	BC132645	Ddit4	5830413E08Rik,AA415483,REDD1,Rtp801,dig2	Mus musculus DNA-damage-inducible transcript 4, mRNA (cDNA clone MGC:164276 IMAGE:40130922), complete cds.	74747	chr10	59412845	59414517	GO:0008150(biological_process)	GO:0005575(cellular_component)	GO:0003674(molecular_function)	Mm.21697	TC1574868	ENSMUST00000020308
BC140322	0.0149624	2.06741	down	0.0345237	1.80971	up	125.504	68.8225	142.955	91.5264	144.835	140.152	76.1751	53.7918	76.5007	141.651	110.926	176.288	BC140322	Rasgrp4	-	Synthetic construct Mus musculus clone IMAGE:100014331, MGC:173331 RAS guanyl releasing protein 4 (Rasgrp4) mRNA, encodes complete protein.	233046	chr7	29920090	29936519	GO:0007242(intracellular signaling cascade);GO:0007264(small GTPase mediated signal transduction);GO:0051056(regulation of small GTPase mediated signal transduction)	GO:0005622(intracellular)	GO:0005085(guanyl-nucleotide exchange factor activity)	Mm.389871	NP595317///TC1580611	ENSMUST00000094617///ENSMUST00000032810
BC146384	0.0400825	1.50608	down	0.00503593	1.98002	up	693.819	352.349	529.635	763.459	604.791	713.206	343.032	418.531	295.485	556.23	594.161	438.515	BC146384	Nktr	5330401F18Rik,D9Wsu172e	Synthetic construct Mus musculus clone IMAGE:100015086, MGC:180361 natural killer tumor recognition sequence (Nktr) mRNA, encodes complete protein.	18087	chr9	121563159	121663446	GO:0006457(protein folding)		GO:0003755(peptidyl-prolyl cis-trans isomerase activity);GO:0016853(isomerase activity);GO:0042277(peptide binding)	Mm.32842	TC1724658///TC1574298	ENSMUST00000035112
BC148369	0.0100048	1.56368	down	0.00805526	1.67982	up	210.118	124.809	195.277	212.618	238.115	179.622	109.17	136.722	128.533	183.299	179.103	223.429	BC148369	Dnmbp	2410003L07Rik,2410003M15Rik,TUBA	Synthetic construct Mus musculus clone IMAGE:100015342, MGC:183248 dynamin binding protein (Dnmbp) mRNA, encodes complete protein.	71972	chr19	43922584	43986870	GO:0007242(intracellular signaling cascade);GO:0035023(regulation of Rho protein signal transduction)	GO:0005622(intracellular);GO:0005737(cytoplasm);GO:0005856(cytoskeleton)	GO:0005085(guanyl-nucleotide exchange factor activity);GO:0005089(Rho guanyl-nucleotide exchange factor activity);GO:0005515(protein binding)	Mm.159024	TC1597358///TC1585191	ENSMUST00000026209
BC148454	0.0321308	1.67559	down	0.0136093	2.33452	up	71.5368	30.4863	50.6047	90.1431	70.9519	53.5153	36.3839	31.8887	23.1864	59.629	47.5554	44.6298	BC148454	Zfp459	9930025G17Rik,Rslcan-14	Synthetic construct Mus musculus clone IMAGE:100015426, MGC:183292 zinc finger protein 459 (Zfp459) mRNA, encodes complete protein.	328274	chr13	67509096	67514893	GO:0006355(regulation of transcription, DNA-dependent)	GO:0005622(intracellular)	GO:0003676(nucleic acid binding);GO:0008270(zinc ion binding);GO:0046872(metal ion binding)	Mm.222470	TC1589386	ENSMUST00000056470
BC148507	0.0431794	1.78979	down	0.00419517	3.21557	up	138.899	44.0753	77.313	117.446	162.792	136.46	47.2606	54.4997	30.4655	89.1645	78.4938	64.2806	BC148507	Lgi2	mKIAA1916	Synthetic construct Mus musculus clone IMAGE:100015541, MGC:183346 leucine-rich repeat LGI family, member 2 (Lgi2) mRNA, encodes complete protein.	246316	chr5	52929203	52957345			GO:0005515(protein binding)	Mm.44721	TC1602242///TC1596206	ENSMUST00000039750
BC150160	0.0099031	1.88573	down	0.0191159	1.73065	up	209.741	122.339	228.101	178.881	228.214	222.128	114.363	152.054	100.6	200.334	243.288	240.682	BC150160	Gabpb2	1810015F01Rik,5830427M07,9430006E19Rik,A430024B14Rik,AV050852,Gabpb2-1	Mus musculus GA repeat binding protein, beta 2, mRNA (cDNA clone MGC:161253 IMAGE:40141577), complete cds.	213054	chr3	94991550	95021615			GO:0003677(DNA binding);GO:0042803(protein homodimerization activity)	Mm.224820///Mm.402805	TC1620900///NP733958///TC1715350	ENSMUST00000098873
BC152819	0.0132519	1.7265	down	0.000474856	1.88059	up	60.3714	32.1939	56.1322	61.0728	62.0689	57.9726	31.2205	29.5668	35.7944	66.5461	57.0992	44.7512	BC152819	Dnaic2	C030015H18Rik,Dnai2,Gm728	Synthetic construct Mus musculus clone IMAGE:100016070, MGC:184363 dynein, axonemal, intermediate chain 2 (Dnaic2) mRNA, encodes complete protein.	432611	chr11	114594224	114618583	GO:0042384(cilium biogenesis)	GO:0005858(axonemal dynein complex);GO:0035085(cilium axoneme)	GO:0003777(microtubule motor activity)	Mm.212764	TC1616770
BC156227	0.00287	1.99983	down	0.00267443	1.89387	up	1095.77	573.721	1159.86	1164.01	1222.73	900.557	574.35	557.124	589.688	1387.59	1126.75	965.245	BC156227	Igdcc4	9330155G14Rik,DDM36,Nope,WI-18508,mKIAA1628	Synthetic construct Mus musculus clone IMAGE:100061591, MGC:190251 neighbor of Punc E11 (Nope) mRNA, encodes complete protein.	56741	chr9	64949341	64983333	GO:0007155(cell adhesion)	GO:0005887(integral to plasma membrane);GO:0016020(membrane);GO:0016021(integral to membrane)	GO:0005515(protein binding)	Mm.209041	TC1577206	ENSMUST00000035499
BC156277	0.043827	1.50581	down	0.0124769	1.62715	up	423.793	262.294	394.999	405.365	397.756	468.258	213.148	295.288	278.445	467.954	332.724	384.32	BC156277	Taok1	2810468K05Rik,AU020252,D130018F14Rik,MGC29021,Map3k16,Markk,Psk2,mKIAA1361	Synthetic construct Mus musculus clone IMAGE:100061696, MGC:190281 TAO kinase 1 (Taok1) mRNA, encodes complete protein.	216965	chr11	77351370	77398906	GO:0006468(protein amino acid phosphorylation)		GO:0000166(nucleotide binding);GO:0004672(protein kinase activity);GO:0004674(protein serine/threonine kinase activity);GO:0005524(ATP binding);GO:0016301(kinase activity);GO:0016740(transferase activity)	Mm.340436	TC1599641///TC1580095///TC1581061	ENSMUST00000017435
BC156636	0.00450001	1.74608	down	0.0126944	1.73303	up	165.547	95.6155	165.598	146.197	194.646	155.8	99.6878	108.161	78.998	164.324	159.914	172.556	BC156636	Xpo4	B430309A01Rik,mKIAA1721	Synthetic construct Mus musculus clone IMAGE:100062113, MGC:190365 exportin 4 (Xpo4) mRNA, encodes complete protein.	57258	chr14	58201107	58283796	GO:0006810(transport);GO:0015031(protein transport)	GO:0005634(nucleus)	GO:0005488(binding)	Mm.202747	TC1761282///TC1612652	ENSMUST00000089482
BC156687	0.021775	1.86387	down	0.0400617	2.5177	up	176.404	67.6672	122.928	100.092	192.377	236.744	67.5675	86.6416	48.7926	126.237	128.743	113.803	BC156687	Gm5150	-	Synthetic construct Mus musculus clone IMAGE:100062192, MGC:190405 SIRP beta 1 like 1 protein (LOC381484) mRNA, encodes complete protein.	381484	chr3	15848072	15906325
D85463	0.0107247	1.80451	down	0.0148045	1.57958	up	584.849	372.203	671.199	581.749	526.782	646.015	388.188	307.232	421.19	766.518	562.462	684.618	D85463	Lrp8	4932703M08Rik,AA921429,AI848122,Lr8b,apoER2	Mus musculus mRNA for apolipoprotein E receptor 2, complete cds.	16975	chr4	107474863	107546772	GO:0006629(lipid metabolic process);GO:0006897(endocytosis);GO:0007165(signal transduction);GO:0045860(positive regulation of protein kinase activity)	GO:0005886(plasma membrane);GO:0016020(membrane);GO:0016021(integral to membrane)	GO:0004872(receptor activity);GO:0004888(transmembrane receptor activity);GO:0005041(low-density lipoprotein receptor activity);GO:0005509(calcium ion binding);GO:0005515(protein binding);GO:0030227(apolipoprotein E receptor activity)	Mm.442134	TC1589051///TC1585592///TC1721664	ENSMUST00000030356
DQ914523	0.00739537	1.72845	down	0.00451228	2.14937	up	95.7029	44.4305	76.5018	89.1429	83.0889	114.877	36.9886	49.5364	46.7665	85.3611	75.3503	68.794	DQ914523	Ivns1abp	1190004M08Rik,1700126I16Rik,AA960440,HSPC068,ND1,NS-1,NS1-BP,Nd1-L,Nd1-S,mKIAA0850	Mus musculus kelch family protein Nd1-S2 mRNA, complete cds.	117198	chr1	153191627	153211575		GO:0005634(nucleus)	GO:0005515(protein binding)	Mm.33764	TC1583658///TC1573979	ENSMUST00000023918
NM_001103179	0.0425057	1.57552	down	0.000723055	2.28476	up	169.772	74.6062	118.878	156.321	172.058	180.938	83.4921	64.1813	76.1452	135.031	89.3707	132.231	NM_001103179	Brwd1	5330419I02Rik,D530019K20Rik,G1-403-16,Wdr9,repro5	Mus musculus bromodomain and WD repeat domain containing 1 (Brwd1), transcript variant 2, mRNA.	93871	chr16	96223154	96304035	GO:0006350(transcription);GO:0006355(regulation of transcription, DNA-dependent);GO:0006357(regulation of transcription from RNA polymerase II promoter)	GO:0005634(nucleus)	GO:0005515(protein binding);GO:0030528(transcription regulator activity)	Mm.441259///Mm.240871	TC1635205///TC1598683///TC1580442///TC1578225	ENSMUST00000023631///ENSMUST00000099502
NM_001109757	0.0068958	1.66297	down	0.0124601	1.92861	up	172.083	87.3661	146.564	195.939	124.588	195.723	88.5289	89.6277	83.9416	162.349	157.716	119.628	NM_001109757	Atp7a	Blo,DXHXS1608e,I14,MNK,Mo,blotchy,br,brindled,mottled	Mus musculus ATPase, Cu++ transporting, alpha polypeptide (Atp7a), transcript variant 1, mRNA.	11977	chrX	103222614	103323499	GO:0001568(blood vessel development);GO:0006568(tryptophan metabolic process);GO:0006570(tyrosine metabolic process);GO:0006584(catecholamine metabolic process);GO:0006810(transport);GO:0006811(ion transport);GO:0006825(copper ion transport);GO:0006878(copper ion homeostasis);GO:0007005(mitochondrion organization and biogenesis);GO:0007626(locomotory behavior);GO:0008152(metabolic process);GO:001…	GO:0000299(integral to membrane of membrane fraction);GO:0005624(membrane fraction);GO:0005794(Golgi apparatus);GO:0005802(trans-Golgi network);GO:0005886(plasma membrane);GO:0005887(integral to plasma membrane);GO:0016020(membrane);GO:0016021(integral to membrane);GO:0030140(trans-Golgi network transport vesicle);GO:0031410(cytoplasmic vesicle);GO:0043005(neuron projection);GO:0043025(cell soma)	GO:0000166(nucleotide binding);GO:0000287(magnesium ion binding);GO:0003824(catalytic activity);GO:0004008(copper-exporting ATPase activity);GO:0005375(copper ion transporter activity);GO:0005507(copper ion binding);GO:0005515(protein binding);GO:0005524(ATP binding);GO:0015097(mercury ion transporter activity);GO:0015662(ATPase activity, coupled to transmembrane movement of ions, phosphorylative…	Mm.254297	TC1620218///TC1583733	ENSMUST00000055941
NM_001111058	0.0241618	1.644	down	0.022508	1.64221	up	789.856	473.986	791.609	963.403	615.131	791.036	512.708	469.956	439.295	982.371	618.892	773.564	NM_001111058	Cd33	Siglec-3,gp67	Mus musculus CD33 antigen (Cd33), transcript variant 1, mRNA.	12489	chr7	50782825	50788541	GO:0007155(cell adhesion)	GO:0005615(extracellular space);GO:0005886(plasma membrane);GO:0016020(membrane);GO:0016021(integral to membrane)	GO:0005515(protein binding);GO:0005529(sugar binding)	Mm.140157	TC1586036	ENSMUST00000004728
NR_002866	0.0144543	1.55632	down	0.0232508	1.52117	up	113.202	74.8788	115.557	99.5103	121.529	118.566	65.3049	69.2308	90.1006	120.697	106.384	119.591	NR_002866	Dio3os	AW556460,Dio3as	Mus musculus deiodinase, iodothyronine type III, opposite strand (Dio3os) on chromosome 12.	353504	chr12	111513594	111516278	GO:0008150(biological_process)	GO:0005575(cellular_component)	GO:0003674(molecular_function)	Mm.442720	TC1608029
XM_001001171	0.00193226	1.67908	down	0.00196099	1.78892	up	373.74	209.703	350.31	395.994	377.368	347.86	199.506	189.748	239.855	348.899	346.911	355.122	XM_001001171	Trip11	2610511G22Rik,3110031G15Rik,6030460N08Rik,AI450776,MGC189992	PREDICTED: Mus musculus thyroid hormone receptor interactor 11, transcript variant 3 (Trip11), mRNA.	109181	chr12	103075509	103151356			GO:0004872(receptor activity)	Mm.426350///Mm.208618	TC1610883///TC1673366///TC1662986///TC1606641///TC1603459	ENSMUST00000021605
XM_001003254	0.000859134	1.98274	down	0.00564998	1.92323	up	211.96	108.607	216.597	202.807	260.811	172.261	109.869	108.809	107.143	249.316	193.176	207.299	XM_001003254	Gm9313	EG668711	PREDICTED: Mus musculus predicted gene, EG668711 (EG668711), mRNA.	668711	chr12	25047999	25049886
XM_001472533	0.000887819	2.2863	down	0.000517545	1.77609	up	130.975	73.8812	169.541	125.305	130.973	136.646	76.6509	66.6861	78.3065	164.228	195.101	149.293	XM_001472533	Gm2115	-	PREDICTED: Mus musculus hypothetical protein LOC100039239 (LOC100039239), mRNA.	100039239	chr7	91677645	91724351
XM_001474739	0.0257422	1.67911	down	0.0134314	1.79524	up	748.985	423.943	702.751	779.382	699.163	768.41	318.808	484.341	468.68	721.176	770.53	616.548	XM_001474739	Gm2792	-	PREDICTED: Mus musculus similar to tubby like protein 4 (LOC100040471), mRNA.	100040471	chr17	6335309	6411092
XM_001478366	0.00767963	1.65194	down	0.00141748	2.09508	up	260.445	124.048	205.69	224.42	269.219	287.695	110.174	132.054	129.916	240.565	183.89	192.614	XM_001478366	Gm3479	-	PREDICTED: Mus musculus similar to LOC635138 protein (LOC100041709), mRNA.	100041709	chr10	78777057	78785274
XM_001478408	0.0412051	1.55047	down	0.00856394	2.10447	up	235.245	113.77	172.97	209.98	243.416	252.338	110.378	87.2658	143.667	168.313	184.5	166.095	XM_001478408	Gm5933	-	PREDICTED: Mus musculus similar to LOC635138 protein (LOC546271), mRNA.	546271	chrX	23730824	23739216
XM_001478411	0.0165855	1.70824	down	0.0109114	1.94253	up	136.113	70.1748	119.28	159.314	112.663	136.362	80.0543	56.039	74.4312	114.826	137.893	105.122	XM_001478411	Gm10116	EG665937,ENSMUSG00000062382	PREDICTED: Mus musculus similar to ferritin light chain 1 (LOC634386), mRNA.	634386	chr13	74536751	74544820
XM_001478568	0.00287979	2.3006	down	0.0139833	1.97018	up	173.024	87.2652	200.135	186.669	200.636	131.766	76.3869	80.6118	104.797	215.297	168.468	216.639	XM_001478568	Gm3806	-	PREDICTED: Mus musculus similar to LOC434536 protein (LOC100042368), mRNA.	100042368	chr1	119909267	119911149
XM_001478621	0.0117086	2.46401	down	0.0494842	2.00724	up	112.567	56.8748	135.312	147.045	86.1758	104.479	51.269	40.4859	78.8694	144.674	142.319	118.943	XM_001478621	Gm9545	-	PREDICTED: Mus musculus similar to G protein-binding protein CRFG (LOC671978), mRNA.	671978	chr7	15550578	15572398
XM_126961	0.00205589	1.97216	down	0.0144252	1.63362	up	53.8263	33.0367	64.6546	47.4902	52.3938	61.5949	31.6495	28.5342	38.9265	62.0316	63.8343	68.098	XM_126961	Plekhh1	AV308913,C77772,D630024D12Rik,mKIAA1200	PREDICTED: Mus musculus pleckstrin homology domain containing, family H (with MyTH4 domain) member 1, transcript variant 1 (Plekhh1), mRNA.	211945	chr12	80108310	80183367		GO:0005856(cytoskeleton)	GO:0003774(motor activity);GO:0003779(actin binding);GO:0005488(binding);GO:0005524(ATP binding)	Mm.268317	TC1666743///NP522277	ENSMUST00000039928
XM_140321	0.0211408	1.61011	down	0.00106039	2.87732	up	78.1996	27.4255	43.8085	70.2519	78.9936	85.3532	27.2804	22.2759	32.7203	45.7032	47.4476	38.2748	XM_140321	Gm4840	EG225468	PREDICTED: Mus musculus predicted gene, EG225468 (EG225468), mRNA.	225468	chr18	46514968	46516621
XM_140607	0.00650926	1.62973	down	0.0191788	2.03371	up	107.022	51.1345	83.4181	89.6071	147.127	84.3315	54.872	44.9881	53.5433	91.5446	72.4749	86.2347	XM_140607	Gm336	-	PREDICTED: Mus musculus gene model 336, (NCBI) (Gm336), mRNA.	240539	chr19	11165058	11166664
XM_283372	0.00698717	1.96988	down	0.0128528	1.82774	up	75.9845	42.1538	81.7171	83.3837	68.3622	76.2075	53.5287	37.2918	35.641	87.2529	79.257	78.6413	XM_283372	Vgll3	1700110N18Rik,4832416J22,C80713,Vgl-3,Vito-2	PREDICTED: Mus musculus vestigial like 3 (Drosophila) (Vgll3), mRNA.	73569	chr16	65815877	65863311				Mm.25670///Mm.392787	TC1617642///TC1607509
XM_355785	0.0443962	1.96223	down	0.017297	4.79134	up	205.538	39.2476	75.536	349.814	105.651	161.15	27.0641	52.7537	37.925	94.6677	71.5101	60.4303	XM_355785	Sh2d6	4933424C13Rik,MGC118386	PREDICTED: Mus musculus SH2 domain containing 6, transcript variant 1 (Sh2d6), mRNA.	71130	chr6	72463645	72470621	GO:0007242(intracellular signaling cascade)			Mm.128597	TC1596929	ENSMUST00000089687
XM_618738	0.00246109	1.8759	down	0.0105474	1.7515	up	449.044	254.859	477.646	417.902	386.511	542.719	238.824	291	234.753	446.205	538.571	448.163	XM_618738	Lats1	AW208599	PREDICTED: Mus musculus large tumor suppressor, transcript variant 1 (Lats1), mRNA.	16798	chr10	7401006	7433314	GO:0000086(G2/M transition of mitotic cell cycle);GO:0000819(sister chromatid segregation);GO:0006468(protein amino acid phosphorylation);GO:0007049(cell cycle);GO:0007067(mitosis);GO:0009755(hormone-mediated signaling);GO:0030833(regulation of actin filament polymerization);GO:0045736(negative regulation of cyclin-dependent protein kinase activity);GO:0045786(negative regulation of progression t…	GO:0000922(spindle pole)	GO:0000166(nucleotide binding);GO:0000287(magnesium ion binding);GO:0004672(protein kinase activity);GO:0004674(protein serine/threonine kinase activity);GO:0005515(protein binding);GO:0005524(ATP binding);GO:0016301(kinase activity);GO:0016740(transferase activity);GO:0019901(protein kinase binding);GO:0046872(metal ion binding)	Mm.436589	TC1620829	ENSMUST00000040043
XM_619387	0.0266928	1.96384	down	0.0158036	1.99965	up	115.838	58.2859	114.825	129.525	125.837	92.1525	71.589	45.1448	58.1239	86.3948	142.582	115.498	XM_619387	Ubxn7	A630090P18,AI196514,KIAA0794,Ubxd7,mKIAA0794	PREDICTED: Mus musculus UBX domain containing 7 (Ubxd7), mRNA.	224111	chr16	32330781	32387978				Mm.270108	TC1573763///TC1597435	ENSMUST00000066414
XM_984461	0.0271391	1.77279	down	0.0429069	1.60543	up	73.8829	47.039	81.7584	68.2113	75.215	78.2225	34.0425	49.3896	57.685	72.9352	90.2075	82.1324	XM_984461	Gm8156	EG666542	PREDICTED: Mus musculus predicted gene, EG666542 (EG666542), mRNA.	666542	chr10	81392818	81415259
XM_991123	0.00327735	1.71657	down	0.00177462	2.16336	up	478.076	219.24	378.033	399.507	559.061	475.661	230.762	203.337	223.622	428.123	378.166	327.811	XM_991123	Gm7975	EG666200	PREDICTED: Mus musculus predicted gene, EG666200, transcript variant 2 (EG666200), mRNA.	666200	chr1	102120384	102128717
XM_994291	0.0142992	1.77917	down	0.0343302	1.87331	up	59.4277	31.0618	55.2617	54.688	79.655	43.9402	37.2168	27.1052	28.8635	59.2521	61.6225	44.9105	XM_994291	Prkcz2	Gm1839,Prkczl	PREDICTED: Mus musculus protein kinase C, zeta 2 (Prkcz2), mRNA.	404705	chr7	28667757	28670149

## Sheet: OVX vs Sham and EXD up>=1.5
SEQ_ID	p-value ( T Test unpaired [Mo] Vs [Zheng] P <= 0.05 FC >=1.5 )	FCAbsolute ( T Test unpaired [Mo] Vs [Zheng] P <= 0.05 FC >=1.5 )	regulation ( T Test unpaired [Mo] Vs [Zheng] P <= 0.05 FC >=1.5 )	p-value ( T Test unpaired [Deng] Vs [Mo] P <= 0.05 FC >=1.5 )	FCAbsolute ( T Test unpaired [Deng] Vs [Mo] P <= 0.05 FC >=1.5 )	regulation ( T Test unpaired [Deng] Vs [Mo] P <= 0.05 FC >=1.5 )	[EXD](raw)	[OVX](raw)	[Sham](raw)	[EXD_1, Deng](raw)	[EXD_2, Deng](raw)	[EXD_3, Deng](raw)	[OVX_1, Mo](raw)	[OVX_2, Mo](raw)	[OVX_3, Mo](raw)	[Sham_1, Zheng](raw)	[Sham_2, Zheng](raw)	[Sham_3, Zheng](raw)	ACCESSION	GENE_NAME	SYNONYM	DESCRIPTION	GENE_ID	CHROMOSOME	START	STOP	GO biological process	GO cellular component	GO molecular function	UniGene	TIGRID	EnsemblID
AB017136	0.0494715	1.68847	up	0.00324697	2.34556	down	70.7107	165.978	99.7981	80.296	73.4273	58.4089	142.681	157.499	197.753	108.967	119.576	70.8514	AB017136	Homer2	AW539445,CPD,Cupidin,Vesl-2	Mus musculus mRNA for cupidin, complete cds.	26557	chr7	88754613	88851680	GO:0007216(metabotropic glutamate receptor signaling pathway)	GO:0005737(cytoplasm)	GO:0003779(actin binding);GO:0005515(protein binding);GO:0030160(GKAP/Homer scaffold activity)	Mm.228	TC1589253///TC1580770	ENSMUST00000026922
AB078010	0.0425053	2.1337	up	0.0130636	1.77863	down	381.895	667.746	332.188	361.019	304.734	479.933	643.533	703.152	656.553	189.144	439.584	367.837	AB078010	Sept4	Bh5,Pnutl2	Mus musculus mRNA for M-Septin, complete cds.	18952	chr11	87394632	87404041	GO:0007049(cell cycle);GO:0007286(spermatid development);GO:0007420(brain development);GO:0030382(sperm mitochondrion organization and biogenesis);GO:0048240(sperm capacitation);GO:0051301(cell division)	GO:0009434(microtubule-based flagellum)	GO:0000166(nucleotide binding);GO:0005525(GTP binding)	Mm.2214	TC1587750	ENSMUST00000084575
AB101633	0.0126341	1.57493	up	0.00733617	3.85549	down	270.448	979.378	624.544	389.322	264.419	157.604	950.457	896.851	1090.83	529.278	718.041	626.314	AB101633	N/A	N/A	Mus musculus abnormal Notch1 cDNA, clone:425-1U.	N/A	chr2	26320869	26322218
AK005461	0.00744624	1.55735	up	5.52765e-05	2.74712	down	1296.59	3559.15	2297.74	1292.39	1398.01	1199.39	3806.93	3442.23	3428.28	2325.77	2602.06	1965.4	AK005461	Tbc1d5	1600014N05Rik,KIAA0210,mKIAA0210	Mus musculus adult female placenta cDNA, RIKEN full-length enriched library, clone:1600014N05 product:hypothetical RabGAP/TBC domain containing protein, full insert sequence.	72238	chr17	51056048	51318660		GO:0005622(intracellular)	GO:0005096(GTPase activator activity);GO:0005097(Rab GTPase activator activity)	Mm.120650	TC1625129///TC1595567///TC1583679///TC1691899	ENSMUST00000095246///ENSMUST00000097308
AK006422	0.00370762	1.51861	up	0.000812248	1.90811	down	67.0873	128.192	84.2682	62.0907	71.8647	67.3066	136.396	114.028	134.152	79.2857	83.1467	90.3723	AK006422	Myl10	1700027I08Rik,Mylc2pl,PLRLC,PLRLC-A,PLRLC-B,PLRLC-C	Mus musculus adult male testis cDNA, RIKEN full-length enriched library, clone:1700027I08 product:myosin light chain 2, precursor lymphocyte-specific, full insert sequence.	59310	chr5	137173719	137176964			GO:0005509(calcium ion binding)	Mm.5178	NP746493	ENSMUST00000005611
AK006996	0.0483787	1.83542	up	0.0151332	2.90239	down	229.109	626.715	355.415	299.077	129.481	258.77	671.393	623.204	585.548	223.04	431.24	411.965	AK006996	1700065I16Rik	1700084L08Rik	Mus musculus adult male testis cDNA, RIKEN full-length enriched library, clone:1700084L08 product:unclassifiable, full insert sequence.	78462	chr15	63648742	63651095				Mm.82775	NP746164
AK007185	0.00500133	1.5123	up	0.00352525	2.06125	down	331.567	680.246	448.163	390.057	324.493	280.152	591.156	721.244	728.337	433.611	474.428	436.452	AK007185	1700112M02Rik	-	Mus musculus adult male testis cDNA, RIKEN full-length enriched library, clone:1700112M02 product:unclassifiable, full insert sequence.	73583	chr13	71625053	71750157
AK007191	0.00888196	2.75291	up	0.00514912	3.03589	down	417.415	1243.21	463.21	556.306	386.443	309.495	1433.39	1008.96	1287.28	393.109	644.085	352.435	AK007191	1700113A16Rik	2210408E11Rik,AA408983	Mus musculus adult male testis cDNA, RIKEN full-length enriched library, clone:1700113A16 product:unclassifiable, full insert sequence.	76642	chr3	87975481	87981704				Mm.432649	TC1631587
AK010323	0.01525	1.76715	up	0.00610945	1.91136	down	97.3704	188.832	105.809	95.409	101.325	95.3774	234.913	156.898	174.685	94.1666	103.181	120.078	AK010323	Tmem134	2410001H17Rik,AI463452	Mus musculus ES cells cDNA, RIKEN full-length enriched library, clone:2410001H17 product:CDNA: FLJ21749 FIS, CLONE COLF5897 homolog [Homo sapiens], full insert sequence.	66990	chr19	4125959	4132307	GO:0006468(protein amino acid phosphorylation)	GO:0016020(membrane);GO:0016021(integral to membrane)	GO:0004672(protein kinase activity);GO:0005524(ATP binding)	Mm.276255	NP585714	ENSMUST00000064575///ENSMUST00000071372
AK010782	0.0218247	1.72785	up	0.00822274	2.10643	down	118.471	251.91	144.308	133.788	101.104	120.521	191.826	290.146	273.757	126.004	143.05	163.87	AK010782	Ppfia3	2410127E16Rik	Mus musculus ES cells cDNA, RIKEN full-length enriched library, clone:2410127E16 product:Liprin-alpha3 (Fragment) homolog [Homo sapiens], full insert sequence.	76787	chr7	52594642	52596141				Mm.277235	TC1581164	ENSMUST00000003961
AK013012	0.00660358	1.52743	up	0.00540963	1.9109	down	161.813	308.943	201.002	135.584	169.273	180.58	269.395	355.316	302.117	204.363	203.763	194.88	AK013012	Klhl35	2810406K13Rik	Mus musculus 10, 11 days embryo whole body cDNA, RIKEN full-length enriched library, clone:2810406K13 product:hypothetical BTB/POZ domain/Kelch repeat containing protein, full insert sequence.	72184	chr7	106614536	106622527			GO:0005515(protein binding)	Mm.153585	TC1587226	ENSMUST00000037359
AK013856	0.00450031	2.09939	up	0.0288116	1.67655	down	79.3509	133.125	62.8871	97.0869	72.0933	68.8726	162.792	124.463	112.119	57.6867	59.7759	71.1986	AK013856	Map2k5	AI324775,AI428457,MEK5,Mapkk5,Prkmk5	Mus musculus 12 days embryo head cDNA, RIKEN full-length enriched library, clone:3000002B10 product:mitogen activated protein kinase kinase 5, full insert sequence.	23938	chr9	63064077	63150967	GO:0000165(MAPKKK cascade);GO:0006468(protein amino acid phosphorylation);GO:0007507(heart development)	GO:0005819(spindle)	GO:0000166(nucleotide binding);GO:0004672(protein kinase activity);GO:0004674(protein serine/threonine kinase activity);GO:0004713(protein-tyrosine kinase activity);GO:0005524(ATP binding);GO:0016301(kinase activity);GO:0016740(transferase activity)	Mm.325746	NP527335///TC1595375	ENSMUST00000034920
AK016553	0.006873	1.87598	up	0.0033261	2.56714	down	55.4105	141.147	75.2648	55.4002	67.0604	43.7708	157.676	147.368	118.397	64.6372	73.7847	87.3726	AK016553	Hsf2bp	4932437G14Rik	Mus musculus adult male testis cDNA, RIKEN full-length enriched library, clone:4932437G14 product:heat shock transcription factor 2 binding protein, full insert sequence.	74377	chr17	32081713	32171437	GO:0006366(transcription from RNA polymerase II promoter);GO:0007283(spermatogenesis)			Mm.75856	TC1584368	ENSMUST00000002145
AK019176	0.0362259	1.52645	up	0.00318807	1.60505	down	80.1443	128.495	85.3105	77.934	73.3711	89.1278	132.928	135.929	116.627	65.1031	97.1696	93.6589	AK019176	Csnk1a1	2610208K14Rik,4632404G05Rik,5430427P18Rik,Csnk1a,MGC29354,MGC30571	Mus musculus 10 days embryo whole body cDNA, RIKEN full-length enriched library, clone:2610208K14 product:CASEIN KINASE I-ALPHA (FRAGMENT) homolog [Bos taurus], full insert sequence.	93687	chr18	61715235	61717892	GO:0006468(protein amino acid phosphorylation);GO:0008150(biological_process);GO:0016055(Wnt receptor signaling pathway)	GO:0005575(cellular_component)	GO:0000166(nucleotide binding);GO:0004672(protein kinase activity);GO:0004674(protein serine/threonine kinase activity);GO:0005524(ATP binding);GO:0016301(kinase activity);GO:0016740(transferase activity)	Mm.26908	TC1632500///TC1765645///TC1709417///TC1572012	ENSMUST00000025469
AK019838	0.00562277	1.57331	up	0.00197829	1.87277	down	49.2028	91.8187	58.5456	54.1694	51.1679	42.271	94.7011	96.8423	83.9126	54.2307	54.2988	67.1073	AK019838	4930593C16Rik	-	Mus musculus adult male testis cDNA, RIKEN full-length enriched library, clone:4930593C16 product:unclassifiable, full insert sequence.	78060	chr9	120833572	120839920
AK020716	0.0139004	2.12657	up	0.0440565	2.81833	down	112.929	300.619	137.726	140.883	55.3515	142.551	394.697	218.155	289.004	141.651	148.587	122.942	AK020716	Map2k5	AI324775,AI428457,MEK5,Mapkk5,Prkmk5	Mus musculus adult male hypothalamus cDNA, RIKEN full-length enriched library, clone:A230106F01 product:MITOGEN ACTIVATED PROTEIN KINASE KINASE 5 homolog [Mus musculus], full insert sequence.	23938	chr9	63188032	63225659	GO:0000165(MAPKKK cascade);GO:0006468(protein amino acid phosphorylation);GO:0007507(heart development)	GO:0005819(spindle)	GO:0000166(nucleotide binding);GO:0004672(protein kinase activity);GO:0004674(protein serine/threonine kinase activity);GO:0004713(protein-tyrosine kinase activity);GO:0005524(ATP binding);GO:0016301(kinase activity);GO:0016740(transferase activity)	Mm.325746	NP527335///TC1595375	ENSMUST00000034920
AK028130	0.0003074	4.36397	up	0.0188754	1.84357	down	431.084	795.932	180.35	350.089	511.512	431.652	942.79	631.472	813.535	187.174	163.839	190.036	AK028130	Magi2	Acvri1,Acvrinp1,Acvrip1,Magi-2,S-SCAM,mKIAA0705	Mus musculus adult male stomach cDNA, RIKEN full-length enriched library, clone:2210404I19 product:hypothetical protein, full insert sequence.	50791	chr5	20208094	20211867	GO:0007165(signal transduction);GO:0007242(intracellular signaling cascade)		GO:0004871(signal transducer activity);GO:0005515(protein binding)	Mm.332231	TC1582217
AK035702	0.00394806	2.37501	up	0.00114221	5.70139	down	83.3107	472.325	195.432	107.987	63.257	78.6882	350.232	526.007	540.734	193.802	184.246	208.247	AK035702	Glp2r	9530092J08Rik,GLP-2	Mus musculus adult male urinary bladder cDNA, RIKEN full-length enriched library, clone:9530092J08 product:similar to GLUCAGON-LIKE PEPTIDE 2 RECEPTOR PRECURSOR (GLP-2 RECEPTOR) (GLP-2-R) (GLP-2R) [Rattus norvegicus], full insert sequence.	93896	chr11	67475003	67571205	GO:0007186(G-protein coupled receptor protein signaling pathway)	GO:0016020(membrane);GO:0016021(integral to membrane)	GO:0004872(receptor activity);GO:0004930(G-protein coupled receptor activity);GO:0004967(glucagon receptor activity)	Mm.118883	TC1598616///TC1730583	ENSMUST00000051765
AK036404	0.045697	1.50752	up	0.0101439	2.61497	down	114.944	292.08	195.091	77.1685	119.027	148.635	249.093	295.578	331.569	159.213	238.058	188	AK036404	Cacnb1	Cchb1,Cchlb1	Mus musculus adult male bone cDNA, RIKEN full-length enriched library, clone:9830006D01 product:calcium channel, voltage-dependent, beta 1 subunit, full insert sequence.	12295	chr11	97866238	97879686	GO:0006612(protein targeting to membrane);GO:0006810(transport);GO:0006811(ion transport);GO:0006816(calcium ion transport);GO:0006936(muscle contraction)	GO:0005624(membrane fraction);GO:0005891(voltage-gated calcium channel complex);GO:0016529(sarcoplasmic reticulum);GO:0030315(T-tubule)	GO:0005216(ion channel activity);GO:0005244(voltage-gated ion channel activity);GO:0005245(voltage-gated calcium channel activity);GO:0005262(calcium channel activity);GO:0005509(calcium ion binding);GO:0005515(protein binding);GO:0008331(high voltage-gated calcium channel activity);GO:0015270(dihydropyridine-sensitive calcium channel activity)	Mm.41252	TC1607224	ENSMUST00000092736
AK036547	0.0277112	1.8541	up	0.0102112	2.48017	down	56.1506	143.145	74.6602	48.0346	63.6363	56.7809	197.453	122.604	109.379	71.5121	74.7082	77.7603	AK036547	N/A	N/A	Mus musculus adult male bone cDNA, RIKEN full-length enriched library, clone:9830132M16 product:arachidonate 5-lipoxygenase activating protein, full insert sequence.	N/A	chr5	150094327	150099444
AK037114	0.012378	1.7327	up	0.00196625	2.76118	down	71.4949	193.694	113.574	69.5839	89.6107	55.29	201.138	192.471	187.473	100.736	143.411	96.5745	AK037114	Osbpl3	1200014M06Rik,6720421I08Rik,A530055M08,MGC102333,ORP3,OSBP3	Mus musculus adult female vagina cDNA, RIKEN full-length enriched library, clone:9930118D02 product:oxysterol binding protein-like 3, full insert sequence.	71720	chr6	50250212	50332836	GO:0006810(transport);GO:0006869(lipid transport);GO:0008202(steroid metabolic process)	GO:0005575(cellular_component)	GO:0003674(molecular_function)	Mm.392849///Mm.44153	TC1586511///TC1630908	ENSMUST00000071728
AK038868	0.013105	2.16387	up	0.0130758	2.38316	down	82.6129	198.784	90.2124	80.1332	102.152	65.5534	173.849	264.637	157.866	82.5467	106.714	81.3768	AK038868	Ccdc13	2900041A11Rik,Gm188	Mus musculus adult male hypothalamus cDNA, RIKEN full-length enriched library, clone:A230069K20 product:hypothetical Regulator of chromosome condensation (RCC1) containing protein, full insert sequence.	434446	chr9	121707698	121719282				Mm.335550	TC1588124
AK049295	0.0115329	1.80021	up	6.66575e-05	2.79761	down	110.316	307.701	173.725	104.928	102.863	123.158	314.907	311.175	297.021	131.261	195.79	194.124	AK049295	C330020E22Rik	-	Mus musculus ES cells cDNA, RIKEN full-length enriched library, clone:C330020E22 product:unclassifiable, full insert sequence.	320896	chr4	129060004	129072505
AK053804	0.000251977	2.29022	up	0.00784727	1.84889	down	141.457	259.557	112.927	133.029	119.705	171.637	288.451	258.969	231.25	110.064	110.831	117.886	AK053804	Rgs12	1200016K18Rik,4632412M04Rik,AI481290,E130309H11	Mus musculus 0 day neonate eyeball cDNA, RIKEN full-length enriched library, clone:E130309H11 product:G-protein signaling regulator 12 homolog [Rattus norvegicus], full insert sequence.	71729	chr5	35292099	35362743	GO:0007165(signal transduction)		GO:0004871(signal transducer activity);GO:0005057(receptor signaling protein activity);GO:0005096(GTPase activator activity);GO:0005515(protein binding)	Mm.196208	TC1575711	ENSMUST00000030984
AK054009	0.0166117	1.74018	up	0.0162973	1.60728	down	48.2909	77.3579	44.8207	41.1527	56.7258	46.9941	85.3238	80.1052	66.6447	35.189	52.349	46.9242	AK054009	Fbxl5	Fbl4,Fir4	Mus musculus 2 days pregnant adult female oviduct cDNA, RIKEN full-length enriched library, clone:E230011P14 product:F-box and leucine-rich repeat protein 5, full insert sequence.	242960	chr5	44153550	44173335	GO:0006512(ubiquitin cycle);GO:0008150(biological_process)	GO:0005575(cellular_component)	GO:0003674(molecular_function);GO:0005515(protein binding)	Mm.25794	TC1657287///TC1585474///TC1571899	ENSMUST00000087465///ENSMUST00000047857
AK076943	0.00316128	2.45427	up	0.0130232	5.41708	down	106.751	517.607	209.827	145.51	130.474	44.268	597.111	410.006	545.704	185.652	198.088	245.741	AK076943	Pias4	PIASY,Pias-gamma,Piasg	Mus musculus adult male testis cDNA, RIKEN full-length enriched library, clone:4930568A14 product:protein inhibitor of activated STAT gamma, full insert sequence.	59004	chr10	80625787	80630559	GO:0000122(negative regulation of transcription from RNA polymerase II promoter);GO:0006350(transcription);GO:0006355(regulation of transcription, DNA-dependent);GO:0006512(ubiquitin cycle);GO:0007259(JAK-STAT cascade);GO:0007275(multicellular organismal development);GO:0016481(negative regulation of transcription);GO:0016925(protein sumoylation)	GO:0005634(nucleus);GO:0016363(nuclear matrix)	GO:0003676(nucleic acid binding);GO:0003677(DNA binding);GO:0003714(transcription corepressor activity);GO:0005515(protein binding);GO:0008270(zinc ion binding);GO:0019789(SUMO ligase activity);GO:0046872(metal ion binding)	Mm.34428	TC1579881	ENSMUST00000005064
AK078399	0.0220576	1.88981	up	0.0495764	1.85147	down	195.833	350.892	188.969	249.032	212.365	126.102	312.624	409.124	330.929	174.743	145.489	246.676	AK078399	Slc6a13	GAT3,Gabt3	Mus musculus 12 days embryo male wolffian duct includes surrounding region cDNA, RIKEN full-length enriched library, clone:6720408E06 product:solute carrier family 6 (neurotransmitter transporter, GABA), member 13, full insert sequence.	14412	chr6	121250313	121283609	GO:0006810(transport);GO:0006836(neurotransmitter transport)	GO:0005887(integral to plasma membrane);GO:0016020(membrane);GO:0016021(integral to membrane)	GO:0005328(neurotransmitter:sodium symporter activity);GO:0005332(gamma-aminobutyric acid:sodium symporter activity);GO:0015293(symporter activity)	Mm.258596	TC1580120	ENSMUST00000064580
AK079431	0.0326649	1.58297	up	0.0325702	1.89748	down	74.4504	139.974	87.6233	90.8767	78.788	53.6865	153.424	107.978	158.519	98.059	88.6594	76.1515	AK079431	Tgm5	2310007C07Rik,MGC143848,MGC143849,TGMX,TGx	Mus musculus adult female vagina cDNA, RIKEN full-length enriched library, clone:9930010E14 product:transglutaminase 5, full insert sequence.	74176	chr2	120900296	120911495	GO:0008150(biological_process);GO:0018149(peptide cross-linking)	GO:0005575(cellular_component)	GO:0003674(molecular_function);GO:0003810(protein-glutamine gamma-glutamyltransferase activity);GO:0005509(calcium ion binding);GO:0008415(acyltransferase activity);GO:0016740(transferase activity);GO:0046872(metal ion binding)	Mm.20187	TC1744245	ENSMUST00000102489
AK082667	0.0197017	1.85613	up	0.0230436	1.71267	down	76.2314	131.948	70.653	69.4191	87.9537	71.3214	139.743	155.296	100.805	84.0804	68.3595	59.5191	AK082667	Nav1	9530089B19,9930003A20Rik,C230080M11Rik,Pomfil3,Unc53h1,mKIAA1151,steerin-1	Mus musculus 0 day neonate cerebellum cDNA, RIKEN full-length enriched library, clone:C230080M11 product:hypothetical Serine-rich region/Treacher Collins syndrome protein Treacle containing protein, full insert sequence.	215690	chr1	137355223	137407028	GO:0001578(microtubule bundle formation);GO:0001764(neuron migration);GO:0008152(metabolic process)	GO:0015630(microtubule cytoskeleton);GO:0016020(membrane)	GO:0000166(nucleotide binding);GO:0005524(ATP binding);GO:0016462(pyrophosphatase activity);GO:0017111(nucleoside-triphosphatase activity)	Mm.34977	TC1585174///TC1579027///TC1606638	ENSMUST00000040599
AK086033	0.00327042	2.10329	up	0.000375589	2.76117	down	124.277	341.924	164.103	115.594	113.247	143.991	370.724	312.134	342.913	148.193	200.81	143.307	AK086033	Rora	9530021D13Rik,Nr1f1,ROR1,ROR2,ROR3,nmf267,sg,staggerer	Mus musculus 16 days neonate heart cDNA, RIKEN full-length enriched library, clone:D830046K01 product:RAR-related orphan receptor alpha, full insert sequence.	19883	chr9	68501608	68512001	GO:0006350(transcription);GO:0006355(regulation of transcription, DNA-dependent);GO:0006809(nitric oxide biosynthetic process);GO:0043030(regulation of macrophage activation);GO:0045944(positive regulation of transcription from RNA polymerase II promoter);GO:0046068(cGMP metabolic process)	GO:0005634(nucleus)	GO:0003677(DNA binding);GO:0003700(transcription factor activity);GO:0003707(steroid hormone receptor activity);GO:0004872(receptor activity);GO:0004879(ligand-dependent nuclear receptor activity);GO:0005515(protein binding);GO:0008270(zinc ion binding);GO:0046872(metal ion binding)	Mm.427266///Mm.393686	TC1681027///TC1586960	ENSMUST00000034766
AK087725	0.0260075	1.92206	up	0.0186084	1.75825	down	218.109	388.418	202.164	206.817	248.647	198.863	339.414	330.862	494.979	151.247	220.243	235.002	AK087725	E330011O21Rik	-	Mus musculus 2 days pregnant adult female ovary cDNA, RIKEN full-length enriched library, clone:E330011O21 product:unclassifiable, full insert sequence.	100126450	chr16	78251112	78295260
AK129026	0.035955	1.98296	up	0.0200229	2.21455	down	42.98	92.3742	48.1012	37.6019	31.4681	59.8701	76.6509	97.12	103.352	32.884	65.8552	45.5643	AK129026	Fmo2	2310008D08Rik,2310042I22Rik,AW107733,MGC28212	Mus musculus cDNA fis, clone TRACH3037267, highly similar to Mus musculus flavin containing monooxygenase 2 (Fmo2).	55990	chr1	164805177	164816646	GO:0006118(electron transport);GO:0006800(oxygen and reactive oxygen species metabolic process)	GO:0005615(extracellular space);GO:0005783(endoplasmic reticulum);GO:0005792(microsome);GO:0016020(membrane);GO:0016021(integral to membrane)	GO:0000287(magnesium ion binding);GO:0004497(monooxygenase activity);GO:0004499(dimethylaniline monooxygenase (N-oxide-forming) activity);GO:0016491(oxidoreductase activity);GO:0050660(FAD binding)	Mm.10929	TC1713715///TC1582614	ENSMUST00000045902
AK134832	0.0434428	1.55298	up	0.0366078	2.12211	down	97.6284	202.235	128.971	62.556	124.558	105.771	251.091	162.058	193.557	148.164	111.8	126.949	AK134832	Dok7	A930013K19Rik,AW049091,Dok-7,EF-12,MGC107606,Oit5	Mus musculus adult male medulla oblongata cDNA, RIKEN full-length enriched library, clone:6330587L01 product:Hypothetical PH domain-like structure containing protein homolog [Mus musculus], full insert sequence.	231134	chr5	35417606	35423613	GO:0001934(positive regulation of protein amino acid phosphorylation);GO:0007528(neuromuscular junction development);GO:0043113(receptor clustering)	GO:0016020(membrane);GO:0045202(synapse)	GO:0005158(insulin receptor binding);GO:0005515(protein binding)	Mm.205483	TC1590875///TC1581722	ENSMUST00000101298///ENSMUST00000050709
AK135576	0.0165109	1.82058	up	0.0411154	1.85593	down	47.8109	88.6832	47.7097	38.5287	62.5368	42.3673	115.778	78.1157	72.1554	45.4556	51.269	46.4046	AK135576	Akap13	1700026G02Rik,5730522G15Rik,5830460E08Rik,AKAP-Lbc,BRX,Ht31,LBC,PROTO-LB,PROTO-LBC	Mus musculus 11 days embryo gonad cDNA, RIKEN full-length enriched library, clone:7030408L02 product:A kinase (PRKA) anchor protein 13, full insert sequence.	75547	chr7	82788204	82849425	GO:0007242(intracellular signaling cascade);GO:0035023(regulation of Rho protein signal transduction)	GO:0005622(intracellular)	GO:0005089(Rho guanyl-nucleotide exchange factor activity);GO:0008270(zinc ion binding);GO:0016301(kinase activity);GO:0019992(diacylglycerol binding);GO:0046872(metal ion binding)	Mm.216107	TC1590701///TC1772315///TC1629323///TC1721087	ENSMUST00000094307///ENSMUST00000098366
AK135842	0.00798348	4.30351	up	2.62295e-06	7.13967	down	77.8097	555.525	139.588	75.1834	83.4886	74.7572	595.329	530.659	540.586	72.8814	195.489	150.394	AK135842	Nlrp4g	MGC91128,nalp4g	Mus musculus in vitro fertilized eggs cDNA, RIKEN full-length enriched library, clone:7420424P07 product:unclassifiable, full insert sequence.	235779	chr9_random	122642	153968
AK140955	0.0290886	1.76782	up	0.0118215	1.90853	down	49.8815	96.0726	54.2464	51.3931	42.4161	55.8354	120.817	82.1826	85.2185	56.1216	63.9328	42.6848	AK140955	Pigu	5430426F17Rik,BC028278,Cdc91l1	Mus musculus 16 days embryo head cDNA, RIKEN full-length enriched library, clone:C130083E04 product:Cell division cycle protein 91-like 1 (CDC91-like 1 protein) homolog [Mus musculus], full insert sequence.	228812	chr2	155158381	155183160	GO:0006506(GPI anchor biosynthetic process);GO:0051301(cell division)	GO:0005783(endoplasmic reticulum);GO:0005789(endoplasmic reticulum membrane);GO:0016020(membrane);GO:0016021(integral to membrane)		Mm.5434	TC1686010///TC1641149	ENSMUST00000077626
AK141686	0.010176	1.74004	up	0.0101198	3.02591	down	38.5334	112.602	64.3165	24.3121	50.9911	40.2971	92.4022	131.487	113.918	72.8233	59.801	60.3252	AK141686	Duxbl	1110051B16Rik,Duxl,MGC67567	Mus musculus 9 days embryo whole body cDNA, RIKEN full-length enriched library, clone:D030023E22 product:weakly similar to Putative homeobox protein (Fragment) [Macaca mulatta], full insert sequence.	278672	chr14	26942408	26949271	GO:0006355(regulation of transcription, DNA-dependent)	GO:0005634(nucleus)	GO:0003677(DNA binding);GO:0003700(transcription factor activity)	Mm.440101	TC1588182
AK143792	0.000695328	1.79325	up	0.0165092	3.08297	down	39.5484	113.788	63.5113	50.1723	47.4386	21.0343	105.444	116.619	119.299	57.6411	67.7566	65.1362	AK143792	Lpar2	Edg4,IPA2,LPA2	Mus musculus 6 days neonate spleen cDNA, RIKEN full-length enriched library, clone:F430109D09 product:endothelial differentiation, lysophosphatidic acid G-protein-coupled receptor 4, full insert sequence.	53978	chr8	72346463	72348674	GO:0007165(signal transduction);GO:0007186(G-protein coupled receptor protein signaling pathway)	GO:0016020(membrane);GO:0016021(integral to membrane)	GO:0001584(rhodopsin-like receptor activity);GO:0001619(lysosphingolipid and lysophosphatidic acid receptor activity);GO:0004871(signal transducer activity);GO:0004872(receptor activity);GO:0004930(G-protein coupled receptor activity);GO:0005515(protein binding);GO:0030274(LIM domain binding)	Mm.23253	TC1624331	ENSMUST00000034325
AK144315	0.0495018	2.30617	up	0.00990529	3.10107	down	427.811	1265.92	587.643	386.581	279.07	617.782	1282.1	1079.31	1436.34	309.42	660.047	793.463	AK144315	Epb4.1l4b	6430543G08Rik,AA589614,AU021054,BB007528,D4Ertd346e,Ehm2	Mus musculus cDNA, RIKEN full-length enriched library, clone:G630018E22 product:erythrocyte protein band 4.1-like 4b, full insert sequence.	54357	chr4	57074612	57156023
AK145215	0.00400632	3.89438	up	0.00115523	2.76674	down	116.461	325.464	85.6854	117.46	105.933	125.989	318.46	266.027	391.904	56.174	109.456	91.4263	AK145215	N/A	N/A	Mus musculus mammary gland RCB-0527 Jyg-MC(B) cDNA, RIKEN full-length enriched library, clone:G930021K18 product:unclassifiable, full insert sequence.	N/A	chr8	66887439	66895897
AK147298	0.0114466	1.53609	up	0.000263788	1.65504	down	476.975	789.863	517.788	454.706	483.934	492.286	770.732	755.634	843.221	432.152	533.061	588.153	AK147298	Adarb1	1700057H01Rik,AW124433,AW558573,Adar2,BB220382,D10Bwg0447e,Red1	Mus musculus cDNA, RIKEN full-length enriched library, clone:M5C1010E10 product:adenosine deaminase, RNA-specific, B1, full insert sequence.	110532	chr10	76753477	76881018	GO:0006396(RNA processing);GO:0006397(mRNA processing);GO:0016553(base conversion or substitution editing)	GO:0005622(intracellular);GO:0005634(nucleus)	GO:0003723(RNA binding);GO:0003725(double-stranded RNA binding);GO:0003726(double-stranded RNA adenosine deaminase activity);GO:0003729(mRNA binding);GO:0004000(adenosine deaminase activity);GO:0008270(zinc ion binding);GO:0016787(hydrolase activity);GO:0046872(metal ion binding)	Mm.276815	TC1610262///NP746270///TC1583142	ENSMUST00000095501
AK161459	0.0273641	2.99603	up	0.0197339	2.09286	down	515.383	1040.84	386.619	712.037	463.287	370.825	1100.22	1067.78	954.508	277.986	651.712	230.158	AK161459	Ppp4r1l	1700007P14Rik,5830403E09Rik,C030010B13Rik	Mus musculus adult male testis cDNA, RIKEN full-length enriched library, clone:4932411J20 product:Hypothetical HMG-I and HMG-Y DNA-binding domain (Fragment), full insert sequence.	100043911	chr2	173411354	173485033
AK162990	0.0197305	2.05774	up	0.0196172	2.80791	down	107.633	293.127	140.874	160.404	83.6077	78.8867	254.389	387.223	237.769	111.03	163.674	147.918	AK162990	Ccdc55	8030451K07,AI851076,AL022898,MGC107323	Mus musculus 0 day neonate thymus cDNA, RIKEN full-length enriched library, clone:A430032G03 product:hypothetical protein, full insert sequence.	237859	chr11	76865150	76891937				Mm.156195	TC1628600///TC1579286///TC1604685	ENSMUST00000102494
AK165640	0.0312099	1.6638	up	0.023288	1.6633	down	59.8117	100.282	60.0629	68.2623	59.0589	52.1138	99.6924	121.021	80.132	54.2368	53.1898	72.762	AK165640	N/A	N/A	Mus musculus nullipotent stem cell CRL-2070 NE cDNA, RIKEN full-length enriched library, clone:G430086G22 product:cytokine receptor-like factor 3, full insert sequence.	N/A	chr11	79876185	79894457
AK216578	0.00755155	3.425	up	0.000997754	5.73067	down	186.587	1038.09	317.694	220.79	215.978	122.994	1003.36	937.625	1173.29	187.809	371.323	393.949	AK216578	N/A	N/A	Mus musculus cDNA, clone:Y2G0138N05, strand:unspecified.	N/A	chr9	21070150	21070295
AK217249	0.00865884	1.70369	up	0.00522042	1.92008	down	47.3042	91.5137	53.2304	49.6688	42.1194	50.1243	75.5048	90.9791	108.057	55.8034	54.8147	49.0732	AK217249	Shf	-	Mus musculus cDNA, clone:Y2G0141C22, strand:minus, reference:ENSEMBL:Mouse-Transcript-ENST:ENSMUST00000048635, based on BLAT search.	435684	chr2	122174627	122179867	GO:0007242(intracellular signaling cascade)			Mm.18929	TC1699183	ENSMUST00000048635
AK217990	0.0116229	1.73214	up	0.00327427	1.66176	down	374.369	624.003	362.269	399.758	377.609	345.739	708.711	561.895	601.403	291.486	391.664	403.656	AK217990	N/A	N/A	Mus musculus cDNA, clone:Y2G0143K12, strand:plus, reference:ENSEMBL:Mouse-Transcript-ENST:ENSMUST00000038217, based on BLAT search.	N/A	chr10	126630785	126632765
AY072796	0.0328703	1.80625	up	0.0361326	1.6123	down	159.214	253.801	143.528	180.158	177.708	119.775	282.353	218.285	260.765	100.64	175.744	154.198	AY072796	Ccrl1	A630091E18Rik,CCBP2,CCR11,CCX-CKR,CCX-CKR1,Cmkbrl1,PPR1,VSHK1	Mus musculus chemokine receptor CCX CKR mRNA, complete cds.	252837	chr9	104000472	104005349	GO:0007165(signal transduction);GO:0007186(G-protein coupled receptor protein signaling pathway)	GO:0016020(membrane);GO:0016021(integral to membrane)	GO:0001584(rhodopsin-like receptor activity);GO:0004871(signal transducer activity);GO:0004872(receptor activity);GO:0004930(G-protein coupled receptor activity);GO:0016493(C-C chemokine receptor activity)	Mm.269254	TC1593626///TC1596586	ENSMUST00000050139///ENSMUST00000076147
AY427560	0.040187	1.50277	up	0.0252006	1.53794	down	122.653	185.984	126.084	143.445	129.106	95.4077	191.676	185.836	180.441	110.384	105.985	161.884	AY427560	Gja1	AU042049,AW546267,Cnx43,Cx43,Cx43alpha1,Gja-1,Npm1,connexin43	Mus musculus isolate exon1A-1E connexin 43 (Gja1) mRNA, partial cds	14609	chr10	56097152	56110223	GO:0001701(in utero embryonic development);GO:0001764(neuron migration);GO:0001947(heart looping);GO:0007154(cell communication);GO:0007267(cell-cell signaling);GO:0007507(heart development);GO:0007512(adult heart development);GO:0008016(regulation of heart contraction);GO:0035050(embryonic heart tube development);GO:0043403(skeletal muscle regeneration);GO:0045844(positive regulation of striated…	GO:0005921(gap junction);GO:0005922(connexon complex);GO:0016020(membrane);GO:0016021(integral to membrane);GO:0030054(cell junction)	GO:0005243(gap-junction forming channel activity);GO:0015285(connexon channel activity)	Mm.378921	TC1573904	ENSMUST00000068581
BC005432	7.45986e-05	7.60387	up	2.58235e-05	7.0899	down	340.495	2413.84	319.716	377.851	340.717	302.916	2366.63	2699.22	2175.65	388.978	283.077	287.094	BC005432	Ctse	A430072O03Rik,C920004C08Rik,CE,CatE	Mus musculus cathepsin E, mRNA (cDNA clone MGC:5924 IMAGE:3601519), complete cds.	13034	chr1	133534890	133572079	GO:0006508(proteolysis);GO:0019886(antigen processing and presentation of exogenous peptide antigen via MHC class II)	GO:0005615(extracellular space);GO:0005768(endosome);GO:0019028(viral capsid);GO:0019031(viral envelope)	GO:0004190(aspartic-type endopeptidase activity);GO:0004193(cathepsin E activity);GO:0004194(pepsin A activity);GO:0005198(structural molecule activity);GO:0008130(neutrophil collagenase activity);GO:0008233(peptidase activity);GO:0016787(hydrolase activity);GO:0042803(protein homodimerization activity)	Mm.230249	TC1576142
BC005474	0.0336517	1.50538	up	0.0232381	1.93709	down	912.78	1716.97	1155.64	1012.02	1107.76	618.556	1688.31	1840.59	1622.01	1265.9	1310.17	890.833	BC005474	Slc39a1	Zip1,Zirtl	Mus musculus solute carrier family 39 (zinc transporter), member 1, mRNA (cDNA clone MGC:6744 IMAGE:3591856), complete cds.	30791	chr3	90052151	90057534	GO:0006829(zinc ion transport);GO:0030001(metal ion transport)	GO:0005575(cellular_component);GO:0016020(membrane)	GO:0005385(zinc ion transporter activity);GO:0046873(metal ion transporter activity)	Mm.428687///Mm.294709	TC1577398///TC1771059	ENSMUST00000015467
BC010551	0.0229669	1.89277	up	0.00385027	1.93556	down	213.887	418.114	222.939	213.732	224.98	202.949	335.621	446.618	472.102	226.061	168.045	274.71	BC010551	Mst1	D3F15S2h,D9H3F15S2,DNF15S2h,Hgfl	Mus musculus macrophage stimulating 1 (hepatocyte growth factor-like), mRNA (cDNA clone MGC:18560 IMAGE:4195560), complete cds.	15235	chr9	107982781	107987322	GO:0006508(proteolysis);GO:0007566(embryo implantation);GO:0007596(blood coagulation)	GO:0005615(extracellular space)	GO:0004252(serine-type endopeptidase activity);GO:0005509(calcium ion binding)	Mm.8369	TC1583338	ENSMUST00000035211
BC010789	0.00611211	1.61064	up	0.000483939	1.96143	down	1185.34	2319.37	1449.48	1229.4	1054.4	1272.23	2298.04	2447.55	2212.53	1350.62	1295.11	1702.72	BC010789	Plac8	C15,D5Wsu111e	Mus musculus placenta-specific 8, mRNA (cDNA clone MGC:18842 IMAGE:4216402), complete cds.	231507	chr5	100982744	101001195	GO:0008150(biological_process)	GO:0005575(cellular_component)	GO:0003674(molecular_function)	Mm.34609	TC1621975	ENSMUST00000031264
BC011217	0.0270969	1.61332	up	0.00291804	1.71829	down	77.1964	131.766	83.2063	83.3155	64.9337	83.3399	129.856	133.334	132.109	61.7049	94.1642	93.7498	BC011217	Serpina3k	1300001I07Rik,D12Rp54,MMCM2,MMSpi2,RP54,Spi-2,Spi2,contrapsin	Mus musculus serine (or cysteine) peptidase inhibitor, clade A, member 3K, mRNA (cDNA clone MGC:18504 IMAGE:4195356), complete cds.	20714	chr12	105576718	105583949			GO:0004866(endopeptidase inhibitor activity);GO:0004867(serine-type endopeptidase inhibitor activity)	Mm.291569	TC1573358///TC1670976	ENSMUST00000043058
BC013056	0.00265239	1.69555	up	0.00519298	1.92028	down	142.864	272.302	160.533	127.846	173.509	127.239	252.364	260.297	304.244	148.941	178.045	154.612	BC013056	Atp6v0a2	8430408C20Rik,AI385560,ATP6a2,AW489264,Atp6n1d,Atp6n2,C76904,MGC124341,MGC124342,Stv1,TJ6M,TJ6s,Tj6	Mus musculus ATPase, H+ transporting, lysosomal V0 subunit A2, mRNA (cDNA clone IMAGE:3585690), with apparent retained intron.	21871	chr5	125192579	125195091	GO:0006810(transport);GO:0006811(ion transport);GO:0015992(proton transport)	GO:0001669(acrosome);GO:0005615(extracellular space);GO:0016020(membrane);GO:0016021(integral to membrane)	GO:0005515(protein binding);GO:0015078(hydrogen ion transporter activity)	Mm.391970///Mm.1158	TC1574260///TC1758390	ENSMUST00000037865
BC017616	0.00418854	1.89339	up	0.000138885	2.48177	down	712.622	1765.38	941.272	680.037	667.059	790.771	1649.78	1842.73	1803.63	778.243	1112.71	932.862	BC017616	Spon2	2310045I24Rik,AI504350,M-spondin,Mindin,Mspondin	Mus musculus spondin 2, extracellular matrix protein, mRNA (cDNA clone MGC:27697 IMAGE:4923292), complete cds.	100689	chr5	33556580	33560820	GO:0006955(immune response);GO:0007155(cell adhesion);GO:0007275(multicellular organismal development)	GO:0005578(proteinaceous extracellular matrix);GO:0005615(extracellular space)	GO:0005515(protein binding)	Mm.34694	NP730029	ENSMUST00000046186
BC019775	0.00345642	1.84184	up	0.0105449	2.32192	down	1003.61	2265.37	1236.62	685.723	1082.51	1242.61	2206.32	2476.75	2113.05	1118.93	1458.68	1132.24	BC019775	Prelp	7330409J17Rik,SLRR2A	Mus musculus proline arginine-rich end leucine-rich repeat, mRNA (cDNA clone MGC:25825 IMAGE:4165772), complete cds.	116847	chr1	135806881	135817954	GO:0001501(skeletal development)	GO:0005578(proteinaceous extracellular matrix);GO:0005615(extracellular space)	GO:0005201(extracellular matrix structural constituent);GO:0005515(protein binding)	Mm.214514	TC1575610	ENSMUST00000048432
BC019947	0.006446	1.66229	up	0.0123397	1.53992	down	1006.89	1547.35	932.419	1155.17	979.652	885.862	1733.46	1510.35	1398.25	1075.3	850.525	871.434	BC019947	Dbndd2	1110017A21Rik,2900022J10Rik,AU041050,AW048677,D2Bwg0891e,R74724	Mus musculus dysbindin (dystrobrevin binding protein 1) domain containing 2, mRNA (cDNA clone MGC:28389 IMAGE:4022474), complete cds.	52840	chr2	164312052	164316267		GO:0005737(cytoplasm)	GO:0005515(protein binding)	Mm.256927	TC1704523///TC1611781///TC1593670	ENSMUST00000069385
BC023170	0.0367855	2.13735	up	0.0316417	1.59696	down	246.032	387.741	191.323	269.269	282.794	186.035	366.455	434.033	362.735	119.817	179.666	274.486	BC023170	Tnni1	2700018B22Rik,AI747285,ssTnI	Mus musculus troponin I, skeletal, slow 1, mRNA (cDNA clone MGC:35867 IMAGE:4949804), complete cds.	21952	chr1	137696409	137707542	GO:0006937(regulation of muscle contraction);GO:0007517(muscle development)	GO:0005861(troponin complex)	GO:0003779(actin binding);GO:0005200(structural constituent of cytoskeleton)	Mm.44379	TC1654952	ENSMUST00000027674
BC024580	0.0335544	1.57327	up	0.0121574	1.53918	down	168.49	259.09	166.54	190.988	166.243	148.24	228.542	260.932	287.797	201.914	130.695	167.01	BC024580	Cmbl	2310016A09Rik	Mus musculus carboxymethylenebutenolidase-like (Pseudomonas), mRNA (cDNA clone MGC:37697 IMAGE:5064316), complete cds.	69574	chr15	31498662	31519874			GO:0003824(catalytic activity);GO:0016787(hydrolase activity)	Mm.28108	TC1579708	ENSMUST00000070918
BC024675	0.0309912	1.74663	up	0.049826	1.66803	down	133.428	226.929	126.824	115.031	129.925	155.327	175.835	302.201	202.751	115.608	139.427	125.437	BC024675	Pik3c3	5330434F23Rik,Vps34	Mus musculus phosphoinositide-3-kinase, class 3, mRNA (cDNA clone MGC:30377 IMAGE:3661094), complete cds.	225326	chr18	30432525	30502769	GO:0006468(protein amino acid phosphorylation)	GO:0005942(phosphoinositide 3-kinase complex)	GO:0000166(nucleotide binding);GO:0004428(inositol or phosphatidylinositol kinase activity);GO:0004672(protein kinase activity);GO:0005515(protein binding);GO:0005524(ATP binding);GO:0016301(kinase activity);GO:0016303(1-phosphatidylinositol-3-kinase activity);GO:0016740(transferase activity);GO:0016773(phosphotransferase activity, alcohol group as acceptor);GO:0030145(manganese ion binding)	Mm.194127	NP748042	ENSMUST00000091978
BC025073	0.021399	1.85927	up	0.028735	1.70125	down	190.629	318.847	174.893	162.792	160.343	248.753	287.671	307.795	361.075	132.768	226.5	165.413	BC025073	Id1	AI323524,D2Wsu140e,Idb1,bHLHb24	Mus musculus inhibitor of DNA binding 1, mRNA (cDNA clone MGC:36214 IMAGE:4206508), complete cds.	15901	chr2	152562009	152563146	GO:0000122(negative regulation of transcription from RNA polymerase II promoter);GO:0007275(multicellular organismal development);GO:0007507(heart development);GO:0030509(BMP signaling pathway);GO:0045449(regulation of transcription);GO:0045765(regulation of angiogenesis)	GO:0005634(nucleus)	GO:0005515(protein binding);GO:0030528(transcription regulator activity)	Mm.444	TC1576104///TC1592216	ENSMUST00000038368
BC026458	0.00353882	1.78344	up	0.0012187	1.86628	down	83.7056	156.834	87.8649	78.6074	86.6697	85.8397	153.411	139.64	177.451	83.9178	99.0663	80.6107	BC026458	Hexim2	4933402L21Rik	Mus musculus hexamthylene bis-acetamide inducible 2, mRNA (cDNA clone MGC:31446 IMAGE:4481287), complete cds.	71059	chr11	102994676	103001186				Mm.273871	TC1585699	ENSMUST00000062530
BC027091	0.0153195	1.62689	up	0.0372118	1.75677	down	84.0147	144.771	89.0312	61.4643	108.022	82.5578	121.456	155.613	157.245	82.2749	80.1356	104.683	BC027091	Rtn1	0710005K15Rik,4930441F12Rik,MGC40985,Nsp,R75279,Rtn1-a,Rtn1-b,Rtn1-c	Mus musculus reticulon 1, mRNA (cDNA clone IMAGE:5357122), complete cds.	104001	chr12	73312738	73336726	GO:0008150(biological_process)	GO:0005783(endoplasmic reticulum);GO:0016020(membrane);GO:0016021(integral to membrane)	GO:0003674(molecular_function)	Mm.221275	TC1599734///TC1574941	ENSMUST00000078505
BC028543	0.00521323	1.62569	up	0.00222264	1.62726	down	1050.8	1710.69	1054.72	1131.85	961.638	1058.91	1593.99	1886.77	1651.31	1159.1	914.074	1090.98	BC028543	Polr2k	MafY,Mt1a,RPABC4,RPB10alpha,RPB12,RPB7.0	Mus musculus polymerase (RNA) II (DNA directed) polypeptide K, mRNA (cDNA clone MGC:41431 IMAGE:3468916), complete cds.	17749	chr15	36103816	36106700	GO:0006350(transcription)	GO:0005634(nucleus)	GO:0003677(DNA binding);GO:0003899(DNA-directed RNA polymerase activity);GO:0008270(zinc ion binding);GO:0016740(transferase activity);GO:0016779(nucleotidyltransferase activity);GO:0046872(metal ion binding)	Mm.27375	TC1579759	ENSMUST00000057177
BC036984	0.0034317	1.70012	up	0.0329999	1.57626	down	144.617	225.693	132.446	156.806	165.714	111.332	256.646	216.925	203.509	128.863	145.537	122.937	BC036984	Nnat	5730414I02Rik,AW107673,Peg5	Mus musculus neuronatin, mRNA (cDNA clone MGC:46898 IMAGE:4981517), complete cds.	18111	chr2	157385866	157388186	GO:0007275(multicellular organismal development)			Mm.233903	TC1582095	ENSMUST00000088484
BC038914	0.0239089	1.63028	up	0.000390228	2.93696	down	537.603	1564.32	977.84	510.492	461.753	640.564	1524.1	1560.05	1608.81	910.495	780.089	1242.94	BC038914	Rarres2	0610007L05Rik,AI303516	Mus musculus retinoic acid receptor responder (tazarotene induced) 2, mRNA (cDNA clone MGC:49275 IMAGE:5100583), complete cds.	71660	chr6	48519694	48522689	GO:0001523(retinoid metabolic process);GO:0006952(defense response)	GO:0005576(extracellular region);GO:0005615(extracellular space)		Mm.28231	TC1594969	ENSMUST00000009425
BC039128	0.0274098	1.68713	up	0.00954242	1.55008	down	815.681	1262.98	759.866	766.062	748.014	932.967	1264.08	1126.17	1398.7	563.562	836.193	879.845	BC039128	Icam2	CD102,Icam-2,Ly-60	Mus musculus intercellular adhesion molecule 2, mRNA (cDNA clone MGC:11559 IMAGE:3962648), complete cds.	15896	chr11	106238969	106243887	GO:0007155(cell adhesion);GO:0016337(cell-cell adhesion)	GO:0001931(uropod);GO:0005887(integral to plasma membrane);GO:0016020(membrane);GO:0016021(integral to membrane)	GO:0005515(protein binding)	Mm.394	TC1581293	ENSMUST00000001055
BC048592	0.00271426	1.7955	up	0.000401027	3.7896	down	89.9077	336.837	188.412	85.7195	109.809	74.1947	365.71	326.128	318.674	169.199	218.112	177.924	BC048592	1700034O15Rik	-	Mus musculus RIKEN cDNA 1700034O15 gene, mRNA (cDNA clone MGC:58639 IMAGE:6707911), complete cds.	76606	chr6	41634429	41635713				Mm.272520	TC1638429	ENSMUST00000031900
BC048660	0.00238157	2.64418	up	0.0402055	3.40834	down	92.0319	274.897	104.967	123.996	35.8519	116.248	237.082	297.779	289.831	82.2536	107.63	125.018	BC048660	1700125D06Rik	-	Mus musculus RIKEN cDNA 1700125D06 gene, mRNA (cDNA clone IMAGE:6773417).	68233	chr4	129168483	129169200				Mm.424983	TC1631121
BC049990	0.000260465	5.16404	up	0.0268126	3.40711	down	74.0844	222.751	43.3862	130.487	47.789	43.9776	232.951	246.136	189.166	37.5526	53.1297	39.4764	BC049990	Iqcg	2400003L07Rik	Mus musculus IQ motif containing G, mRNA (cDNA clone MGC:59000 IMAGE:6310844), complete cds.	69707	chr16	33015470	33056256				Mm.227918	TC1582284
BC051917	0.00267297	1.5924	up	0.000860783	2.33457	down	4773.69	11064.4	6969.06	4614.86	5593.48	4112.74	11383.8	11405.9	10403.4	6118.02	7381.83	7407.33	BC051917	Mmp17	MT4-MMP	Mus musculus matrix metallopeptidase 17, mRNA (cDNA clone MGC:62154 IMAGE:5716458), complete cds.	23948	chr5	130090088	130114086	GO:0000270(peptidoglycan metabolic process);GO:0006508(proteolysis)	GO:0005578(proteinaceous extracellular matrix);GO:0016020(membrane)	GO:0004222(metalloendopeptidase activity);GO:0005509(calcium ion binding);GO:0008233(peptidase activity);GO:0008237(metallopeptidase activity);GO:0008270(zinc ion binding);GO:0016787(hydrolase activity);GO:0046872(metal ion binding);GO:0048503(GPI anchor binding)	Mm.42047	TC1579514///TC1762804	ENSMUST00000031390
BC055291	0.0107728	1.67298	up	0.00951375	1.84658	down	247.067	454.684	271.633	203.03	249.48	288.691	397.92	438.75	527.382	244.473	254.978	315.449	BC055291	Car2	AI131712,CAII,Car-2,Ltw-5,Lvtw-5	Mus musculus carbonic anhydrase 2, mRNA (cDNA clone MGC:62540 IMAGE:6479187), complete cds.	12349	chr3	14886705	14900770	GO:0002009(morphogenesis of an epithelium);GO:0006730(one-carbon compound metabolic process);GO:0015670(carbon dioxide transport);GO:0046903(secretion)	GO:0005737(cytoplasm)	GO:0004089(carbonate dehydratase activity);GO:0008270(zinc ion binding);GO:0016829(lyase activity);GO:0046872(metal ion binding)	Mm.1186	TC1714886	ENSMUST00000029078
BC057005	0.00304656	1.80166	up	0.00520636	1.50853	down	1501.62	2259.56	1261.01	1363.93	1452.73	1688.21	2162.17	2178.08	2438.42	1097.34	1460.39	1225.3	BC057005	Spry4	A030006O18Rik,sprouty4	Mus musculus sprouty homolog 4 (Drosophila), mRNA (cDNA clone MGC:67021 IMAGE:6821944), complete cds.	24066	chr18	38745918	38760922	GO:0007275(multicellular organismal development);GO:0009966(regulation of signal transduction);GO:0043407(negative regulation of MAPK activity)	GO:0016020(membrane)	GO:0005515(protein binding)	Mm.42038	TC1766923///TC1582732	ENSMUST00000025295
BC060239	0.000584742	1.81555	up	0.000714404	1.56721	down	75.1129	117.563	64.9231	71.2683	72.5308	81.5396	119.1	112.484	121.106	58.4138	65.5342	70.8214	BC060239	2610109H07Rik	Draxin,neucrin	Mus musculus RIKEN cDNA 2610109H07 gene, mRNA (cDNA clone MGC:77973 IMAGE:6853328), complete cds.	70433	chr4	147472545	147504788				Mm.275288	TC1578595///TC1636549	ENSMUST00000030862
BC061047	0.00573969	2.4222	up	0.0292682	2.35162	down	66.1426	148.492	61.7348	62.2109	41.5015	94.7155	178.543	132.384	134.548	70.3336	68.2575	46.6132	BC061047	4930433N12Rik	-	Mus musculus RIKEN cDNA 4930433N12 gene, mRNA (cDNA clone IMAGE:6703264).	114673	chr9	3190268	3199799				Mm.422774	TC1596180
BC061225	0.0443026	2.23302	up	0.00761407	1.92134	down	382.095	724.019	346.719	438.584	293.124	414.578	672.437	756.411	743.207	188.105	457.866	394.187	BC061225	Gpihbp1	1110002J19Rik,GPI-HBP1	Mus musculus GPI-anchored HDL-binding protein 1, mRNA (cDNA clone MGC:74374 IMAGE:30298145), complete cds.	68453	chr15	75427087	75428643	GO:0006869(lipid transport);GO:0030301(cholesterol transport)	GO:0009986(cell surface);GO:0046658(anchored to plasma membrane)	GO:0008035(high-density lipoprotein binding)	Mm.46367	TC1581997	ENSMUST00000023243
BC081450	0.0282654	1.54274	up	0.00682534	1.86489	down	7711.39	14195.3	9334.76	9335.55	7591.85	6206.76	13630.6	15016.1	13939.2	10975.7	9817.26	7211.36	BC081450	Rpl41	1810055P16Rik	Mus musculus cDNA clone IMAGE:6815275.	67945	chr10	127985172	127986126	GO:0006412(translation);GO:0008150(biological_process)	GO:0005575(cellular_component);GO:0005840(ribosome);GO:0030529(ribonucleoprotein complex)	GO:0003674(molecular_function);GO:0003735(structural constituent of ribosome)	Mm.290786	TC1679553	ENSMUST00000073238
BC087831	0.0186957	1.93646	up	0.0173741	1.88221	down	233.349	436.246	227.682	292.861	216.509	190.679	358.792	444.999	504.946	181.661	292.29	209.096	BC087831	Neurod6	Atoh2,MGC90713,Math-2,Math2,Nex,Nex1m,bHLHa2	Mus musculus neurogenic differentiation 6, mRNA (cDNA clone MGC:90713 IMAGE:6411826), complete cds.	11922	chr6	55627815	55631050	GO:0006350(transcription);GO:0006355(regulation of transcription, DNA-dependent);GO:0007275(multicellular organismal development);GO:0007399(nervous system development);GO:0030154(cell differentiation);GO:0045449(regulation of transcription)	GO:0005634(nucleus)	GO:0003677(DNA binding);GO:0030528(transcription regulator activity)	Mm.5106	TC1580357	ENSMUST00000044767
BC089628	0.0002463	2.26335	up	0.0250944	1.56954	down	86.818	134.77	59.4949	90.9726	101.364	68.1174	132.133	147.891	124.285	58.8251	55.5001	64.1594	BC089628	EG627782	-	Mus musculus predicted gene, EG627782, mRNA (cDNA clone MGC:107702 IMAGE:6761066), complete cds.	627782	chrX	7674212	7683827	GO:0006511(ubiquitin-dependent protein catabolic process)	GO:0005829(cytosol);GO:0005839(proteasome core complex (sensu Eukaryota));GO:0043234(protein complex)	GO:0004298(threonine endopeptidase activity)	Mm.305432	TC1592123	ENSMUST00000089433
BC091751	0.0118159	1.83564	up	0.0338227	1.5077	down	707.51	1052.71	582.613	709.879	558.744	853.909	1091.37	968.072	1098.7	456.774	722.062	569.003	BC091751	Rbp1	CRBPI,Crbp,Rbp-1	Mus musculus retinol binding protein 1, cellular, mRNA (cDNA clone MGC:102298 IMAGE:4022443), complete cds.	19659	chr9	98325235	98346969	GO:0006810(transport);GO:0042572(retinol metabolic process)		GO:0005488(binding);GO:0005501(retinoid binding);GO:0008289(lipid binding);GO:0016918(retinal binding);GO:0019841(retinol binding)	Mm.279741	NP1489318	ENSMUST00000052068
BC092089	0.0242866	1.75598	up	0.0272715	1.58808	down	57.0908	91.3188	51.962	65.7186	53.8879	51.6658	73.173	92.4229	108.361	58.0046	41.0779	56.8034	BC092089	Cml3	4833414A14Rik,4930583K21Rik	Mus musculus camello-like 3, mRNA (cDNA clone MGC:103086 IMAGE:4975242), complete cds.	93674	chr6	85656700	85658548	GO:0006355(regulation of transcription, DNA-dependent);GO:0007162(negative regulation of cell adhesion);GO:0007275(multicellular organismal development);GO:0007369(gastrulation);GO:0008152(metabolic process);GO:0048276(gastrulation (sensu Vertebrata))	GO:0005615(extracellular space);GO:0005634(nucleus);GO:0005783(endoplasmic reticulum);GO:0005794(Golgi apparatus);GO:0016020(membrane);GO:0016021(integral to membrane)	GO:0003700(transcription factor activity);GO:0008080(N-acetyltransferase activity);GO:0008415(acyltransferase activity);GO:0016740(transferase activity)	Mm.440772	TC1642544	ENSMUST00000050780
BC094013	0.00939759	1.5971	up	0.0198003	1.68088	down	2329.91	3906.11	2429.22	2824.93	2141.66	2023.13	3995.27	3260.01	4463.04	2349.65	2317.09	2620.92	BC094013	Igk	MGC102615,MGC150007,MGC28604,MGC41421,MGC6612,kappa	Mus musculus cDNA clone MGC:102615 IMAGE:5042866, complete cds.	243469	chr6	70673879	70676960
BC098099	0.0311094	1.75298	up	0.0156179	1.75439	down	200.289	354.415	202.565	172.652	214.832	213.382	393.661	394.148	275.437	195.951	249.407	162.338	BC098099	BC005764	KIAA4076,Prg2,mKIAA4076	Mus musculus cDNA sequence BC005764, mRNA (cDNA clone MGC:106510 IMAGE:6813259), complete cds.	216152	chr10	79323219	79337132				Mm.29678	NP717762	ENSMUST00000092325
BC108989	0.0264277	1.89566	up	0.0451529	1.68593	down	69.3179	116.733	61.8075	79.131	52.2604	76.5624	146.822	99.0708	104.307	47.9061	77.6177	59.8987	BC108989	Trpc3	MGC124333,Mwk,Trcp3,Trp3,Trrp3	Mus musculus transient receptor potential cation channel, subfamily C, member 3, mRNA (cDNA clone MGC:124333 IMAGE:40047766), complete cds.	22065	chr3	36520126	36570525	GO:0006355(regulation of transcription, DNA-dependent);GO:0006810(transport);GO:0006811(ion transport);GO:0006816(calcium ion transport)	GO:0005887(integral to plasma membrane);GO:0016020(membrane);GO:0016021(integral to membrane)	GO:0003677(DNA binding);GO:0003700(transcription factor activity);GO:0004872(receptor activity);GO:0005216(ion channel activity);GO:0005262(calcium channel activity);GO:0005509(calcium ion binding);GO:0005515(protein binding)	Mm.74363	TC1583927	ENSMUST00000029271
BC116674	0.000936131	2.74003	up	0.00231066	1.63217	down	130.85	213.983	78.5763	140.938	123.907	127.705	189.712	222.054	230.182	65.073	79.2297	91.4263	BC116674	Faim3	1810037B05Rik,MGC144825,MGC144826,Toso	Mus musculus Fas apoptotic inhibitory molecule 3, mRNA (cDNA clone MGC:144825 IMAGE:40106407), complete cds.	69169	chr1	132762248	132777335	GO:0006955(immune response)	GO:0016020(membrane);GO:0016021(integral to membrane)		Mm.46042	TC1582507	ENSMUST00000038829
BC119068	0.0250146	1.55048	up	0.0426204	2.3387	down	58.8404	127.862	82.5107	40.0453	94.074	42.4018	137.639	139.618	106.328	74.9028	74.8495	97.7798	BC119068	Olfr769	MOR114-14	Mus musculus olfactory receptor 769, mRNA (cDNA clone MGC:155384 IMAGE:8733817), complete cds.	257667	chr10	128548483	128549567	GO:0007165(signal transduction);GO:0007186(G-protein coupled receptor protein signaling pathway);GO:0007608(sensory perception of smell);GO:0050896(response to stimulus)	GO:0016020(membrane);GO:0016021(integral to membrane)	GO:0004871(signal transducer activity);GO:0004872(receptor activity);GO:0004930(G-protein coupled receptor activity);GO:0004984(olfactory receptor activity)	Mm.377271	NP646521	ENSMUST00000050915
BC119083	0.0488694	2.12571	up	0.0381557	3.12386	down	73.8543	213.9	103.07	34.1117	102.026	85.4254	182.511	284.877	174.312	71.1261	88.9557	149.127	BC119083	Sele	CD62E,E-selectin,Elam	Mus musculus selectin, endothelial cell, mRNA (cDNA clone MGC:155399 IMAGE:8733832), complete cds.	20339	chr1	165978413	165986975	GO:0007155(cell adhesion);GO:0007157(heterophilic cell adhesion)	GO:0016020(membrane);GO:0016021(integral to membrane)	GO:0005509(calcium ion binding);GO:0005515(protein binding);GO:0005529(sugar binding)	Mm.5245	TC1593440	ENSMUST00000027874
BC119116	0.010068	2.0297	up	0.00926211	2.33946	down	130.8	302.563	149.509	127.522	99.1031	165.774	362.363	254.859	290.466	133.408	185.449	129.669	BC119116	Olfr1261	MOR234-3	Mus musculus olfactory receptor 1261, mRNA (cDNA clone MGC:155432 IMAGE:8733865), complete cds.	258466	chr2	89833519	89834552	GO:0007165(signal transduction);GO:0007186(G-protein coupled receptor protein signaling pathway);GO:0007608(sensory perception of smell);GO:0050896(response to stimulus)	GO:0016020(membrane);GO:0016021(integral to membrane)	GO:0004871(signal transducer activity);GO:0004872(receptor activity);GO:0004930(G-protein coupled receptor activity);GO:0004984(olfactory receptor activity)	Mm.246628	TC1600979	ENSMUST00000077785
BC130255	0.0139894	1.67093	up	0.00285944	1.64084	down	264.436	431.898	262.077	300.66	257.689	234.961	412.421	448.481	434.791	208.936	260.127	317.169	BC130255	Slc16a11	AB041591,MNCb-2717,RP23-198E14.4	Mus musculus solute carrier family 16 (monocarboxylic acid transporters), member 11, mRNA (cDNA clone IMAGE:40142554), partial cds.	216867	chr11	70028145	70029787	GO:0006810(transport)	GO:0016020(membrane);GO:0016021(integral to membrane)	GO:0005215(transporter activity)	Mm.289238	TC1621582	ENSMUST00000069008
E07271	0.00696093	2.34913	up	0.000600464	2.07286	down	446.861	923.322	403.621	471.338	389.852	479.393	952.262	954.727	862.978	309.332	537.571	363.959	E07271	N/A	N/A	cDNA encoding mouse BNP,proBNP and preproBNP,and ditto.	N/A	chr4	147360007	147361307
NM_001098810	0.0360879	1.67831	up	0.000714471	2.12739	down	232.469	493.398	301.321	209.698	262.332	225.377	509.555	449.691	520.948	402.147	263.722	238.095	NM_001098810	Ptrh2	A230072I16Rik,Bit1,CGI-147	Mus musculus peptidyl-tRNA hydrolase 2 (Ptrh2), transcript variant 2, mRNA.	217057	chr11	86497484	86505959		GO:0005739(mitochondrion)	GO:0004045(aminoacyl-tRNA hydrolase activity);GO:0016787(hydrolase activity)	Mm.24868	TC1577548///TC1622393	ENSMUST00000100665
NR_001460	0.00368808	1.74815	up	2.8445e-05	2.17004	down	1321.49	2867.14	1651.79	1305.66	1267.68	1391.12	3004.66	2790.04	2806.72	1854.43	1720.8	1380.14	NR_001460	Rmrp	1110032O22Rik,Rmrpr	Mus musculus RNA component of mitochondrial RNAase P (Rmrp) on chromosome 4.	19782	chr4	43505656	43505931		GO:0005615(extracellular space);GO:0005739(mitochondrion)
XM_001000857	0.0366341	1.63664	up	0.0456708	1.69859	down	45.9466	75.6019	47.292	61.1525	44.1093	32.5781	74.9719	71.5488	80.285	61.4979	44.4039	35.9743	XM_001000857	Tchh	AHF,AI597080,Thh	PREDICTED: Mus musculus trichohyalin (Tchh), mRNA.	99681	chr3	93246251	93252999	GO:0045109(intermediate filament organization)		GO:0005509(calcium ion binding);GO:0030674(protein binding, bridging)	Mm.316671	TC1707494///TC1710934	ENSMUST00000064257
XM_001471969	0.0431007	1.78916	up	0.0184073	2.4747	down	42.9791	106.602	58.446	36.6015	57.5139	34.8218	74.4102	133.873	111.524	49.7693	69.4471	56.1216	XM_001471969	1700110I01Rik	1700016F01Rik	PREDICTED: Mus musculus RIKEN cDNA 1700110I01 gene (1700110I01Rik), mRNA.	73549	chr14	20315546	20324089				Mm.398741	TC1587950	ENSMUST00000100902
XM_001472553	0.0334611	1.70094	up	0.0263634	2.17273	down	36.2561	77.7241	45.2267	48.9189	26.6897	33.1596	86.0011	89.4409	57.7304	38.3484	44.7523	52.5793	XM_001472553	Gm10436	ENSMUSG00000072907,MGC107361	PREDICTED: Mus musculus similar to Oog1 protein, transcript variant 2 (LOC100039315), mRNA.	100039315	chr12	89414032	89420338
XM_001473075	0.0387364	1.77732	up	0.0404595	2.03476	down	46.3513	95.6141	51.9489	60.1906	41.4611	37.4023	127.698	66.3819	92.7621	53.1447	52.5722	50.1297	XM_001473075	Gm2298	-	PREDICTED: Mus musculus hypothetical protein LOC100039538 (LOC100039538), mRNA.	100039538	chr14	27143261	27144113
XM_001473265	0.00184308	1.98552	up	0.00395661	1.88025	down	81.8746	154.348	77.3516	86.2222	87.8741	71.5276	176.113	132.201	154.73	71.0789	78.6827	82.2931	XM_001473265	Gm2356	-	PREDICTED: Mus musculus similar to Glycine Rich Secreted Protein family member (grsp-2) (LOC100039650), mRNA.	100039650	chr9	117730701	117731454
XM_001473448	0.0164797	1.64517	up	0.00075392	2.64812	down	402.397	1057.25	650.458	385.265	478.233	343.694	1069.45	978.071	1124.22	514.588	664.682	772.103	XM_001473448	Gm10153	ENSMUSG00000066101	PREDICTED: Mus musculus similar to keratin associated protein 5-4 (LOC100039757), mRNA.	100039757	chr7	149375331	149376294
XM_001473784	0.00693168	2.08891	up	0.00707585	2.47704	down	148.553	365.121	174.286	184.682	147.524	113.454	428.597	372.538	294.228	207.469	162.714	152.674	XM_001473784	Gm2494	-	PREDICTED: Mus musculus similar to Ubtf protein (LOC100039920), mRNA.	100039920	chr8	86629806	86649161
XM_001473836	0.0176679	1.57531	up	0.0123453	1.70609	down	185.515	314.233	200.621	148.222	203.763	204.56	277.202	326.278	339.218	163.262	223.999	214.602	XM_001473836	Gm2514	-	PREDICTED: Mus musculus similar to reproductive homeobox on X chromosome 8 (LOC100039952), mRNA.	100039952	chr3	143767460	143795994
XM_001474170	0.0165627	1.57363	up	0.0401875	1.562	down	173.075	268.848	170.257	209.543	170.608	139.074	241.962	319.43	245.152	154.789	194.341	161.641	XM_001474170	Gm2629	-	PREDICTED: Mus musculus hypothetical protein LOC100040151 (LOC100040151), mRNA.	100040151	chr18	15352792	15372324
XM_001474300	0.0447725	1.7613	up	0.0151957	1.94666	down	146.51	278.734	163.726	174.086	161.24	104.205	281.586	260.819	293.797	108.674	175.807	206.698	XM_001474300	Gm2667	-	PREDICTED: Mus musculus hypothetical protein LOC100040215 (LOC100040215), mRNA.	100040215	chr19	9999053	10003078
XM_001474959	0.0193247	1.57708	up	0.000234301	4.1987	down	40.176	167.559	107.043	35.6739	48.4402	36.414	175.4	178.564	148.712	86.5233	111.277	123.33	XM_001474959	Gm2790	-	PREDICTED: Mus musculus similar to 4930408F14Rik protein (LOC100040467), mRNA.	100040467	chrX	30373996	30375797
XM_001475161	0.00157042	1.96622	up	0.0293523	1.72269	down	922.4	1560.61	792.413	733.65	1203.59	829.962	1779.99	1467.18	1434.65	876.739	776.526	723.974	XM_001475161	Gm2935	-	PREDICTED: Mus musculus similar to retinitis pigmentosa GTPase regulator interacting protein 1 (LOC100040735), mRNA.	100040735	chr4	28228554	28237716
XM_001475452	0.00259112	1.58248	up	0.000135499	2.71451	down	198.454	539.277	340.371	198.191	183.811	213.359	482.649	560.934	574.248	351.503	312.745	356.867	XM_001475452	Gm10526	ENSMUSG00000073524	PREDICTED: Mus musculus similar to elongation factor 1 homolog (S. cerevisiae) (LOC100040604), mRNA.	100040604	chr18	80216047	80216923
XM_001475469	0.0101147	1.53193	up	0.0033681	4.343	down	167.484	699.857	453.682	229.364	165.141	107.946	796.285	715.047	588.239	430.708	456.012	474.326	XM_001475469	Gm10525	ENSMUSG00000073521	PREDICTED: Mus musculus similar to elongation factor 1 homolog (S. cerevisiae) (LOC639825), mRNA.	639825	chr18	80225849	80226725
XM_001475709	0.00868561	1.50415	up	0.000807591	5.26634	down	117.426	606.794	401.178	82.6777	130.666	138.936	641.089	665.315	513.977	383.478	421.674	398.382	XM_001475709	Gm3114	-	PREDICTED: Mus musculus hypothetical protein LOC100041051 (LOC100041051), mRNA.	100041051	chr7	66887993	66891144
XM_001476851	0.0116679	1.57356	up	0.00175475	2.82899	down	146.519	413.811	261.121	118.662	152.67	168.225	353.382	400.4	487.651	272.059	239.363	271.942	XM_001476851	Gm3219	-	PREDICTED: Mus musculus similar to Bcl7c protein (LOC100041231), mRNA.	100041231	chr14	35158240	35158872
XM_001476878	0.000257595	2.42572	up	0.00409529	3.07081	down	332.356	984.003	407.747	457.006	239.286	300.777	1004.93	972.158	974.921	381.58	467.954	373.708	XM_001476878	Gm3481	-	PREDICTED: Mus musculus similar to keratin associated protein 5-1 (LOC100041716), mRNA.	100041716	chr3	78749870	78751694
XM_001477941	0.00212208	1.79626	up	0.0125651	2.33355	down	75.0234	169.204	94.2751	63.8496	56.4952	104.725	177.642	150.944	179.025	87.1373	106.101	89.5874	XM_001477941	Gm3790	-	PREDICTED: Mus musculus similar to Ubtf protein (LOC100042323), mRNA.	100042323	chr18	48518536	48529949
XM_001478078	0.00789046	1.54572	up	0.00258734	6.83189	down	450.322	2869.4	1860.12	491.311	617.596	242.059	3169.68	2646.42	2792.1	1632.1	1866.58	2081.7	XM_001478078	Ttll13	1700111A04Rik,4921538O11,BC024578	PREDICTED: Mus musculus hypothetical protein LOC100042379 (LOC100042379), mRNA.	269954	chr7	87391186	87391692	GO:0006464(protein modification process)		GO:0004835(tubulin-tyrosine ligase activity);GO:0016874(ligase activity)	Mm.276780	TC1587023///TC1690996	ENSMUST00000058266
XM_001478105	0.0295637	1.53118	up	0.00437492	2.33818	down	116.736	275.462	177.372	135.52	105.98	108.709	265.807	339.241	221.337	166.142	187.531	178.443	XM_001478105	Gm3823	-	PREDICTED: Mus musculus similar to CG2839-PA (LOC100042396), mRNA.	100042396	chr12	13617042	13629754
XM_001478994	0.00490237	1.59499	up	0.0402944	2.09	down	42.1981	83.37	52.2848	35.3763	28.1862	63.0318	88.3756	74.016	87.7184	58.4026	47.8338	50.6179	XM_001478994	N/A	N/A	PREDICTED: Mus musculus hypothetical protein LOC100042884 (LOC100042884), mRNA.	N/A	chr16	18348260	18354343
XM_001479233	0.00230248	2.07591	up	0.0300292	1.62509	down	341.66	546.295	264.651	423.573	262.753	338.653	565.141	492.046	581.699	278.02	296.825	219.108	XM_001479233	N/A	N/A	PREDICTED: Mus musculus hypothetical protein LOC100042978 (LOC100042978), mRNA.	N/A	chr14	63741170	63742790
XM_001479658	0.0206854	2.12256	up	0.0170132	1.90287	down	54.563	105.659	49.6627	62.2083	51.3669	50.1138	81.2799	100.142	135.555	42.2106	42.5764	64.2012	XM_001479658	Pik3c2b	C330011J12Rik,Gm199,PI3K-C2beta	PREDICTED: Mus musculus phosphoinositide-3-kinase, class 2, beta polypeptide (Pik3c2b), mRNA.	240752	chr1	134962876	135004025	GO:0007154(cell communication)	GO:0005942(phosphoinositide 3-kinase complex)	GO:0004428(inositol or phosphatidylinositol kinase activity);GO:0005515(protein binding);GO:0016301(kinase activity);GO:0016303(1-phosphatidylinositol-3-kinase activity);GO:0035091(phosphoinositide binding)	Mm.425057	TC1610275
XM_001480053	0.0313937	1.9502	up	0.00533127	2.88546	down	51.5673	149.058	76.6582	58.3605	38.8949	57.4465	168.46	110.648	168.066	55.5082	88.0466	86.4197	XM_001480053	Gm4311	-	PREDICTED: Mus musculus hypothetical protein LOC100043245 (LOC100043245), mRNA.	100043245	chr19	43713016	43716337
XM_001480324	0.00294132	1.79901	up	0.00111027	2.0054	down	164.135	328.756	183.207	152.462	185.555	154.388	302.12	321.551	362.596	162.764	209.061	177.795	XM_001480324	Gm5112	D530008I22	PREDICTED: Mus musculus hypothetical protein D530008I22 (D530008I22), mRNA.	330414	chr6	122761157	122763555
XM_135594	0.0168287	1.62573	up	0.0262445	2.36656	down	47.6203	107.566	66.08	43.2944	68.7966	30.77	89.6408	121.815	111.243	56.4879	75.1949	66.5571	XM_135594	4930402K13Rik	-	PREDICTED: Mus musculus RIKEN cDNA 4930402K13 gene (4930402K13Rik), mRNA.	75775	chrX	8681687	8683468				Mm.50374	TC1592425	ENSMUST00000059967
XM_894112	0.000882952	1.98021	up	0.000393011	1.997	down	739.09	1479.54	746.764	779.702	713.871	723.698	1519.75	1597.54	1321.34	674.83	761.733	803.728	XM_894112	Gm6959	EG629257	PREDICTED: Mus musculus predicted gene, EG629257 (EG629257), mRNA.	629257	chr12	21109860	21109980
XM_900336	0.0289157	1.56004	up	0.00104485	2.56345	down	1666.65	4223.68	2751.24	2011.35	1603.91	1384.7	4239.15	4063.41	4368.49	2080.01	3094.31	3079.4	XM_900336	Gm6837	EG628080	PREDICTED: Mus musculus predicted gene, EG628080 (EG628080), mRNA.	628080	chrX	68266262	68268209
XM_913285	0.00547998	1.8676	up	3.26685e-05	3.24001	down	126.938	410.501	222.491	134.922	131.419	114.474	397.9	402.021	431.581	190.904	273.827	202.741	XM_913285	Gm7209	EG637566	PREDICTED: Mus musculus predicted gene, EG637566 (EG637566), mRNA.	637566	chrX	164974333	164984273
